# Supplementary material for: Iridium complex immobilized on a high-nitrogen containing covalent triazine framework derived from 2,5-pyrazinedicarbonitrile as a recyclable catalyst for the selective N-alkylation of aminobenzenesulfonamides with alcohols
Source: Royal Society of Chemistry journal article supplement (doi:10.1039/d2qm00357k), 2022-01-01

## Electronic Supplementary Information for

# Iridium complex immobilized on high-nitrogen containing covalent triazine framework derived from 2,5-pyrazinedicarbonitrile as a recyclable catalyst for the selective N-alkylation of aminobenzenesulfonamides with alcohols

Chenchen Yang, Shushu Hao, Lu Shen, Peng Liu, Jiazhi Yang, and Feng Li\*

\* E-mail: fengli@njust.edu.cn

School of Chemistry and Chemical Engineering, Nanjing University of Science & Technology, Nanjing  
210094, P. R. China

### Contents

|                                                                                              |        |
|----------------------------------------------------------------------------------------------|--------|
| General Experimental Details                                                                 | S2     |
| Procedure for the synthesis of CTF                                                           | S2     |
| Procedure for the synthesis of Cp*Ir@CTF                                                     | S3     |
| Experimental procedures and characterization data of products                                | S3-11  |
| Fig. S1. FT-IR spectra of 2,5-pyridinedicarbonitrile, CTF, Cp*Ir@CTF and recovered Cp*Ir@CTF | S12    |
| Fig. S2. XRD of CTF                                                                          | S12    |
| Fig. S3. TGA of CTF                                                                          | S12    |
| Fig. S4. TEM image of CTF                                                                    | S13    |
| Fig. S5. SEM image of CTF                                                                    | S13    |
| Fig. S6. TEM image of Cp*Ir@CTF and recovered Cp*Ir@CTF                                      | S13    |
| Fig. S7. SEM image of Cp*Ir@CTF and recovered Cp*Ir@CTF                                      | S14    |
| Fig. S8. SEM image of Cp*Ir@CTF and EDS mapping                                              | S14    |
| Fig. S9. SEM image of recovered Cp*Ir@CTF and EDS mapping                                    | S15    |
| Fig. S10. The structure of [Cp*Ir(bpy)Cl]Cl                                                  | S15    |
| Fig. S11. XPS of Cp*Ir@CTF and recovered Cp*Ir@CTF                                           | S16    |
| Table S1. Atomic composition by EDS                                                          | S16    |
| Table S2. BET analysis of CTF and Cp*Ir@CTF, and ICP-MS data                                 | S16    |
| Copies of <sup>1</sup> H NMR and <sup>13</sup> C NMR spectra of products                     | S17-74 |

**General Experimental Details.** All reagents and materials used in this study were obtained from commercial sources and used as received unless mentioned otherwise. Quant 250 FEG operated at an accelerating voltage of 20.0 kV was used for the Scanning Electron Microscopy (SEM) and Energy-Dispersive X-ray Spectroscopy (EDS) measurements. X-ray Photoelectron Spectroscopy (XPS) analysis was performed on a PHI QUANTERA II using Mg K $\alpha$  as the excitation source. All binding energy values were calibrated using the adventitious carbon C1s peak at 284.6 eV. XRD patterns were collected on a Bruker D8 Advanced Diffractometer using Cu K $\alpha$  irradiation ( $\lambda=0.15406$  Å). TGA was performed on a Mettler 851e instrument with a heating rate of 10 °C min<sup>-1</sup> in oxygen atmosphere. Metal contents in the Cp\*Ir@CTF was determined by inductively coupled plasma optical emission spectrometry (ICP-MS) (iCAP-Q, Thermo Fisher Scientific) using microwave assisted acid digestion system (MARS6, CEM/U.S.A). BET surface area and N<sub>2</sub> adsorption-desorption measurements were conducted at 77 K using an automated gas sorption system (ASAP 2020). ATR-IR measurements were recorded on a Thermo Fisher Scientific Nicolet iS 10 instrument. Melting points were measured on a X-6 micro-melting apparatus. Proton nuclear magnetic resonance (<sup>1</sup>H NMR) spectra were recorded at 500 MHz using a 500 spectrometer. Chemical shifts are reported in delta ( $\delta$ ) units, parts per million (ppm) downfield from tetramethylsilane or ppm relative to the center of the singlet at 2.50 ppm for DMSO-d<sub>6</sub>. Coupling constants J values are reported in Hertz (Hz), and the splitting patterns were designated as follows: s, singlet; d, doublet; t, triplet; m, multiplet; b, broad. Carbon-13 nuclear magnetic resonance (<sup>13</sup>C NMR) spectra were recorded at 125 MHz using a 500 spectrometer. Chemical shifts are reported in delta ( $\delta$ ) units, ppm relative to the center of the triplet at 39.52 ppm for DMSO-d<sub>6</sub>. <sup>13</sup>C NMR spectra were routinely run with broadband decoupling. Analytical thin-layer chromatography (TLC) was carried out using 0.2 mm commercial silica gel plates. [Cp\*IrCl<sub>2</sub>]<sub>2</sub><sup>1</sup> and [Cp\*Ir(bpy)Cl]Cl<sup>2</sup> were synthesized according to the previously reported methods.

**Procedure for the synthesis of CTF.**<sup>3</sup> 2,5-pyrazinedicarbonitrile (0.30 g, 2.31 mmol) and zinc chloride (1.61 g, 11.8 mmol) were charged to a 20 mL ampoule under Ar atmosphere and closed with septum. The ampoule was then sealed under vacuum by flame and the contents were heated to 400 °C in a furnace for a period of 48 h. The heating rate was maintained to be 60 °C/h. The furnace was cooled to 20 °C after 48 h. The crude product was collected, ground well and stirred with 500 mL of water for 3 h. The black solid was filtered and washed with water and acetone. The resulting solid was

refluxed with 1 M HCl solution (500 mL) for 16 h, filtered and washed with 1 M HCl (3 × 100 mL), H<sub>2</sub>O (3 × 100 mL), THF (3 × 100 mL) and acetone (3 × 100 mL). The black solid was dried under vacuum at 60 °C for 12 h.

**Procedure for the synthesis of Cp\*Ir@CTF.** To a suspension of CTF (0.15 g) in mixed solution of 5.0 mL of dichloromethane was added [Cp\*IrCl<sub>2</sub>]<sub>2</sub> (0.10 g) under N<sub>2</sub> atm. The resulting suspension was reacted at 70 °C under N<sub>2</sub> atm for 12 h. After 12 h, the black solid was filtered and washed with an excess of dichloromethane (10 × 25 mL) to remove the unreacted metal precursor. The synthesized catalyst was dried under vacuum at 60 °C for 12 h for analysis and use as a catalyst.

**General procedure for the N-alkylation of aminobenzenesulfonamides with alcohols catalyzed by Cp\*Ir@CTF.** Under a nitrogen atmosphere, to a 25-mL Schlenk tube were added aminobenzenesulfonamide (0.5 mmol), alcohol (0.6 mmol, 1.2 equiv), Cp\*Ir@CTF (20 mg, 1 mol % Ir), Cs<sub>2</sub>CO<sub>3</sub> (1 equiv) and *tert*-amyl alcohol (1 mL). The mixture was heated at 125 °C for 12 h and was then allowed to cool to ambient temperature. The reaction mixture was concentrated in vacuo and purified by flash column chromatography with hexanes/ethyl acetate to afford the corresponding product.

**4-amino-N-benzylbenzenesulfonamide (3aa).**<sup>4</sup> Purified by flash column chromatography on silica gel (hexanes/ethyl acetate = 2/1); White solid; 86% yield (113 mg); mp 186-187 °C; <sup>1</sup>H NMR (500 MHz, DMSO-d<sub>6</sub>) δ 7.63 (t, *J* = 6.4 Hz, 1H), 7.45 (d, *J* = 8.5 Hz, 2H), 7.30-7.21 (m, 5H), 6.61 (d, *J* = 8.6 Hz, 2H), 5.92 (s, 2H), 3.87 (d, *J* = 6.4 Hz, 2H); <sup>13</sup>C {<sup>1</sup>H} NMR (125 MHz, DMSO-d<sub>6</sub>) δ 152.8, 138.4, 128.8, 128.5, 127.8, 127.3, 125.9, 113.0, 46.4.

**N-(3-methoxybenzyl)-4-aminobenzenesulfonamide (3ab).**<sup>5</sup> Purified by flash column chromatography on silica gel (hexanes/ethyl acetate = 2/1); White solid; 82% yield (120 mg); mp 100-101 °C; <sup>1</sup>H NMR (500 MHz, DMSO-d<sub>6</sub>) δ 7.62 (t, *J* = 6.4 Hz, 1H), 7.44 (d, *J* = 8.7 Hz, 2H), 7.19 (t, *J* = 7.5 Hz, 1H), 6.82-6.77 (m, 3H), 6.61 (d, *J* = 8.6 Hz, 2H), 5.91 (s, 2H), 3.86 (d, *J* = 6.3 Hz, 2H), 3.70 (s, 3H); <sup>13</sup>C {<sup>1</sup>H} NMR (125 MHz, DMSO-d<sub>6</sub>) δ 164.3, 157.5, 144.7, 134.3, 133.5, 130.7, 124.8, 118.0, 117.8, 117.5, 60.0, 51.1.

**N-(4-methoxybenzyl)-4-aminobenzenesulfonamide (3ac).**<sup>5</sup> Purified by flash column chromatography on silica gel (hexanes/ethyl acetate = 2/1); White solid; 85% yield (124 mg); mp 130-131 °C; <sup>1</sup>H NMR (500 MHz, DMSO-d<sub>6</sub>) δ 7.53 (t, *J* = 6.4 Hz, 1H), 7.44 (d, *J* = 8.7 Hz, 2H), 7.14 (d, *J* = 8.5 Hz, 2H), 6.84 (d, *J* = 8.6 Hz, 2H), 6.61 (d, *J* = 8.7 Hz, 2H), 5.91 (s, 2H), 3.79 (d, *J* = 6.4 Hz, 2H), 3.71 (s, 3H); <sup>13</sup>C {<sup>1</sup>H} NMR (125 MHz, DMSO-d<sub>6</sub>) δ 158.7, 152.7, 130.1, 129.2, 128.8, 126.0, 113.9, 113.0, 55.3, 45.9.

**N-(4-methylbenzyl)-4-aminobenzenesulfonamide (3ad).**<sup>5</sup> Purified by flash column chromatography on silica gel (hexanes/ethyl acetate = 2/1); White solid; 88% yield (122 mg); mp 146-147 °C; <sup>1</sup>H NMR (500 MHz, DMSO-d<sub>6</sub>) δ 7.56 (t, *J* = 6.3 Hz, 1H), 7.44 (d, *J* = 8.6 Hz, 2H), 7.10 (q, *J* = 8.0 Hz, 4H), 6.61 (d, *J* = 8.6 Hz, 2H), 5.91 (s, 2H), 3.81 (d, *J* = 6.3 Hz, 2H), 2.26 (s, 3H); <sup>13</sup>C {<sup>1</sup>H} NMR (125 MHz, DMSO-d<sub>6</sub>) δ 152.7, 136.4, 135.2, 129.0, 128.8, 127.8, 125.9, 113.0, 46.2, 20.9.

**N-(4-isopropylbenzyl)-4-aminobenzenesulfonamide (3ae).**<sup>5</sup> Purified by flash column chromatography on silica gel (hexanes/ethyl acetate = 2/1); White solid; 85% yield (129 mg); mp 137-138 °C; <sup>1</sup>H NMR (500 MHz, DMSO-d<sub>6</sub>) δ 7.55 (t, *J* = 6.1 Hz, 1H), 7.44 (d, *J* = 8.5 Hz, 2H), 7.14 (s, 4H), 6.61 (d, *J* = 8.6 Hz, 2H), 5.91 (s, 2H), 3.83 (d, *J* = 6.3 Hz, 2H), 2.88-2.80 (m, 1H), 1.17 (d, *J* = 7.0 Hz, 6H); <sup>13</sup>C {<sup>1</sup>H} NMR (125 MHz, DMSO-d<sub>6</sub>) δ 152.7, 147.5, 135.6, 128.8, 127.9, 126.4, 125.9, 112.9, 46.2, 33.4, 24.2.

**N-(4-bromobenzyl)-4-aminobenzenesulfonamide (3af).**<sup>5</sup> Purified by flash column chromatography on silica gel (hexanes/ethyl acetate = 2/1); White solid; 86% yield (147 mg); mp 186-187 °C; <sup>1</sup>H NMR (500 MHz, DMSO-d<sub>6</sub>) δ 7.69 (s, 1H), 7.48-7.41 (m, 4H), 7.21 (d, *J* = 8.4 Hz, 2H), 6.60 (d, *J* = 8.7 Hz, 2H), 5.94 (s, 2H), 3.84 (d, *J* = 6.6 Hz, 2H); <sup>13</sup>C {<sup>1</sup>H} NMR (125 MHz, DMSO-d<sub>6</sub>) δ 152.8, 138.0, 131.3, 130.0, 128.7, 125.7, 120.3, 113.0, 45.7.

**N-(2-chlorobenzyl)-4-aminobenzenesulfonamide (3ag).**<sup>5</sup> Purified by flash column chromatography on silica gel (hexanes/ethyl acetate = 2/1); White solid; 85% yield (126 mg); mp 111-112 °C; <sup>1</sup>H NMR (500 MHz, DMSO-d<sub>6</sub>) δ 7.76 (t, *J* = 6.1 Hz, 1H), 7.54-7.48 (m, 3H), 7.37 (d, *J* = 7.7 Hz, 1H), 7.31-7.24 (m, 2H), 6.68 (d, *J* = 8.1 Hz, 2H), 5.96 (s, 2H), 4.01 (d, *J* = 5.9 Hz, 2H); <sup>13</sup>C {<sup>1</sup>H} NMR (125 MHz, DMSO-d<sub>6</sub>) δ 152.9, 135.6, 132.4, 129.9, 129.3, 129.1, 128.9, 127.3, 125.6, 113.1, 43.9.

**N-(4-chlorobenzyl)-4-aminobenzenesulfonamide (3ah).**<sup>6</sup> Purified by flash column chromatography on silica gel (hexanes/ethyl acetate = 2/1); White solid; 87% yield (129 mg); mp 167-168 °C; <sup>1</sup>H NMR (500 MHz, DMSO-d<sub>6</sub>) δ 7.68 (t, *J* = 6.4 Hz, 1H), 7.43 (d, *J* = 8.6 Hz, 2H), 7.33 (d, *J* = 8.2 Hz, 2H), 7.26 (d, *J* = 8.2 Hz, 2H), 6.60 (d, *J* = 8.6 Hz, 2H), 5.93 (s, 2H), 3.86 (d, *J* = 6.4 Hz, 2H); <sup>13</sup>C {<sup>1</sup>H} NMR (125 MHz, DMSO-d<sub>6</sub>) δ 152.8, 137.5, 131.8, 129.7, 128.7, 128.4, 125.8, 113.0, 45.6.

**N-(3-fluorobenzyl)-4-aminobenzenesulfonamide (3ai).**<sup>7</sup> Purified by flash column chromatography on silica gel (hexanes/ethyl acetate = 2/1); White solid; 91% yield (127 mg); mp 107-108 °C; <sup>1</sup>H NMR (500 MHz, DMSO-d<sub>6</sub>) δ 7.72 (t, *J* = 6.4 Hz, 1H), 7.43 (d, *J* = 8.6 Hz, 2H), 7.34-7.30 (m, 1H), 7.09-7.03 (m, 3H), 6.60 (d, *J* = 8.9 Hz, 2H), 5.94 (s, 2H), 3.91 (d, *J* = 6.7 Hz, 2H); <sup>13</sup>C {<sup>1</sup>H} NMR (125 MHz, DMSO-d<sub>6</sub>) δ 163.3, 161.4, 152.8, 141.5, (C-F, <sup>3</sup>*J*<sub>C-F</sub> = 7.2 Hz), 130.4 (C-F, <sup>3</sup>*J*<sub>C-F</sub> = 8.2 Hz), 128.7, 125.8, 123.7 (C-F, <sup>4</sup>*J*<sub>C-F</sub> = 2.5 Hz), 114.2 (C-F, <sup>2</sup>*J*<sub>C-F</sub> = 31.4 Hz), 112.9, 45.7.

**N-(4-(trifluoromethoxy)benzyl)-4-aminobenzenesulfonamide (3aj).**<sup>5</sup> Purified by flash column chromatography on silica gel (hexanes/ethyl acetate = 2/1); White solid; 85% yield (147 mg); mp 151-152 °C; <sup>1</sup>H NMR (500 MHz, DMSO-d<sub>6</sub>) δ 7.70 (t, *J* = 6.4 Hz, 1H), 7.43 (d, *J* = 8.6 Hz, 2H), 7.37 (d, *J* = 8.4 Hz, 2H), 7.28 (d, *J* = 8.2 Hz, 2H), 6.60 (d, *J* = 8.6 Hz, 2H), 5.94 (s, 2H), 3.91 (d, *J* = 6.4 Hz, 2H); <sup>13</sup>C {<sup>1</sup>H} NMR (125 MHz, DMSO-d<sub>6</sub>) δ 152.8, 147.6, 138.0, 129.6, 128.7, 125.7, 121.1, 120.4 (C-F, <sup>1</sup>*J*<sub>C-F</sub> = 256.0 Hz), 112.9, 45.6.

**N-(3-(trifluoromethyl)benzyl)-4-aminobenzenesulfonamide (3ak).**<sup>8</sup> Purified by flash column chromatography on silica gel (hexanes/ethyl acetate = 2/1); White solid; 84% yield (139 mg); mp 176-177 °C; <sup>1</sup>H NMR (500 MHz, DMSO-d<sub>6</sub>) δ 7.80 (t, *J* = 6.2 Hz, 1H), 7.59-7.51 (m, 4H), 7.44 (d, *J* = 8.4 Hz, 2H), 6.60 (d, *J* = 8.4 Hz, 2H), 5.94 (s, 2H), 4.01 (d, *J* = 6.2 Hz, 2H); <sup>13</sup>C {<sup>1</sup>H} NMR (125 MHz, DMSO-d<sub>6</sub>) δ 152.9, 140.1, 131.9, 129.5, 129.2 (C-F, <sup>2</sup>*J*<sub>C-F</sub> = 31.2 Hz), 128.7, 125.7, 124.5 (C-F, <sup>1</sup>*J*<sub>C-F</sub> = 272.2 Hz), 124.2, 124.0, 113.0, 45.7.

**N-(4-(trifluoromethyl)benzyl)-4-aminobenzenesulfonamide (3al).**<sup>9</sup> Purified by flash column chromatography on silica gel (hexanes/ethyl acetate = 2/1); White solid; 80% yield (132 mg); mp 168-170 °C; <sup>1</sup>H NMR (500 MHz, DMSO-d<sub>6</sub>) δ 7.77 (t, *J* = 6.4 Hz, 1H), 7.65 (d, *J* = 8.0 Hz, 2H), 7.48 (d, *J* = 8.0 Hz, 2H), 7.43 (d, *J* = 8.6 Hz, 2H), 6.60 (d, *J* = 8.6 Hz, 2H), 5.94 (s, 2H), 3.98 (d, *J* = 6.4 Hz,

2H);  $^{13}\text{C}$   $\{^1\text{H}\}$  NMR (125 MHz, DMSO- $d_6$ )  $\delta$  152.9, 143.4, 128.8, 128.5, 127.9 (C-F,  $^2J_{\text{C-F}} = 31.6$  Hz), 125.6, 125.3 (C-F,  $^3J_{\text{C-F}} = 3.7$  Hz), 124.6 (C-F,  $^1J_{\text{C-F}} = 268.8$  Hz), 112.9, 45.8.

**4-amino-N-(thiophen-2-ylmethyl)benzenesulfonamide (3am).**<sup>5</sup> Purified by flash column chromatography on silica gel (hexanes/ethyl acetate = 2/1); White solid; 81% yield (109 mg); mp 130-131 °C;  $^1\text{H}$  NMR (500 MHz, DMSO- $d_6$ )  $\delta$  7.75 (t,  $J = 6.3$  Hz, 1H), 7.44 (d,  $J = 8.6$  Hz, 2H), 7.39-7.38 (d,  $J = 4.8$  Hz, 1H), 6.91 (t,  $J = 5.0$  Hz, 2H), 6.61 (d,  $J = 8.6$  Hz, 2H), 5.93 (s, 2H), 4.05 (d,  $J = 6.3$  Hz, 2H);  $^{13}\text{C}$   $\{^1\text{H}\}$  NMR (125 MHz, DMSO- $d_6$ )  $\delta$  152.8, 141.4, 128.8, 127.0, 125.9, 125.7, 125.6, 113.0, 41.7.

**4-amino-N-(naphthalen-1-ylmethyl)benzenesulfonamide (3an).**<sup>5</sup> Purified by flash column chromatography on silica gel (hexanes/ethyl acetate = 2/1); White solid; 89% yield (139 mg); mp 174-175 °C;  $^1\text{H}$  NMR (500 MHz, DMSO- $d_6$ )  $\delta$  8.05 (t,  $J = 5.4$  Hz, 1H), 7.94-7.92 (m, 1H), 7.86-7.84 (m, 1H), 7.64 (t,  $J = 6.3$  Hz, 1H), 7.54-7.51 (m, 4H), 7.45-7.40 (m, 2H), 6.65 (d,  $J = 8.6$  Hz, 2H), 5.97 (s, 2H), 4.28 (d,  $J = 6.1$  Hz, 2H);  $^{13}\text{C}$   $\{^1\text{H}\}$  NMR (125 MHz, DMSO- $d_6$ )  $\delta$  152.9, 133.5, 133.3, 131.3, 128.9, 128.7, 128.3, 126.8, 126.5, 126.1, 125.6, 124.0, 113.0, 44.8.

**4-amino-N-octylbenzenesulfonamide (3ao).**<sup>10</sup> Purified by flash column chromatography on silica gel (hexanes/ethyl acetate = 2/1); White solid; 90% yield (128 mg); mp 113-114 °C;  $^1\text{H}$  NMR (500 MHz, DMSO- $d_6$ )  $\delta$  7.40 (d,  $J = 8.8$  Hz, 2H), 7.02 (t,  $J = 5.9$  Hz, 1H), 6.60 (d,  $J = 8.7$  Hz, 2H), 5.88 (s, 2H), 2.62 (q,  $J = 6.6$  Hz, 2H), 1.33-1.29 (m, 2H), 1.24-1.16 (m, 10H), 0.84 (t,  $J = 7.1$  Hz, 3H);  $^{13}\text{C}$   $\{^1\text{H}\}$  NMR (125 MHz, DMSO- $d_6$ )  $\delta$  152.6, 128.7, 125.9, 112.9, 42.7, 31.5, 29.2, 28.9, 28.8, 26.4, 22.4, 14.2.

**4-amino-N-pentylbenzenesulfonamide (3ap).**<sup>11</sup> Purified by flash column chromatography on silica gel (hexanes/ethyl acetate = 2/1); White solid; 86% yield (104 mg); mp 115-116 °C;  $^1\text{H}$  NMR (500 MHz, DMSO- $d_6$ )  $\delta$  7.40 (d,  $J = 8.7$  Hz, 2H), 7.02 (t,  $J = 6.0$  Hz, 1H), 6.60 (d,  $J = 8.6$  Hz, 2H), 5.88 (s, 2H), 2.64-2.60 (m, 2H), 1.35-1.30 (m, 2H), 1.19-1.16 (m, 4H), 0.80 (t,  $J = 6.8$  Hz, 3H);  $^{13}\text{C}$   $\{^1\text{H}\}$  NMR (125 MHz, DMSO- $d_6$ )  $\delta$  152.6, 128.7, 126.0, 112.9, 42.7, 28.8, 28.6, 22.0, 14.1.

**4-amino-N-butylbenzenesulfonamide (3aq).**<sup>12</sup> Purified by flash column chromatography on silica gel (hexanes/ethyl acetate = 2/1); Pink solid; 82% yield (94 mg); mp 92-93 °C;  $^1\text{H}$  NMR (500 MHz,

DMSO- $d_6$ )  $\delta$  7.40 (d,  $J = 8.6$  Hz, 2H), 7.03 (t,  $J = 5.9$  Hz, 1H), 6.60 (d,  $J = 8.8$  Hz, 2H), 5.89 (s, 2H), 2.62 (q,  $J = 6.7$  Hz, 2H), 1.31 (q,  $J = 7.4$  Hz, 2H), 1.22 (m, 2H), 0.78 (t,  $J = 7.1$  Hz, 3H);  $^{13}\text{C}$   $\{^1\text{H}\}$  NMR (125 MHz, DMSO- $d_6$ )  $\delta$  152.6, 128.7, 125.9, 112.9, 42.4, 31.2, 19.6, 13.8.

**4-amino-N-(cyclohexylmethyl)benzenesulfonamide (3ar).**<sup>5</sup> Purified by flash column chromatography on silica gel (hexanes/ethyl acetate = 2/1); White solid; 83% yield (111 mg); mp 168-169 °C;  $^1\text{H}$  NMR (500 MHz, DMSO- $d_6$ )  $\delta$  7.39 (d,  $J = 8.8$  Hz, 2H), 7.05 (t,  $J = 6.2$  Hz, 1H), 6.59 (d,  $J = 8.8$  Hz, 2H), 5.88 (s, 2H), 2.46 (t,  $J = 6.7$  Hz, 2H), 1.64-1.57 (m, 5H), 1.32-1.25 (m, 1H), 1.12-1.05 (m, 3H), 0.80-0.72 (m, 2H);  $^{13}\text{C}$   $\{^1\text{H}\}$  NMR (125 MHz, DMSO- $d_6$ )  $\delta$  152.6, 128.6, 126.1, 112.9, 49.0, 37.4, 30.6, 26.3, 25.6.

**4-amino-N-cyclohexylbenzenesulfonamide (3as).**<sup>13</sup> Purified by flash column chromatography on silica gel (hexanes/ethyl acetate = 2/1); White solid; 60% yield (76 mg); mp 84-85 °C;  $^1\text{H}$  NMR (500 MHz, DMSO- $d_6$ )  $\delta$  7.41 (d,  $J = 8.6$  Hz, 2H), 7.10 (t,  $J = 7.3$  Hz, 1H), 6.58 (d,  $J = 8.7$  Hz, 2H), 5.87 (s, 2H), 2.78 (s, 1H), 1.55 (s, 4H), 1.43 (d,  $J = 11.1$  Hz, 1H), 1.13-1.00 (m, 5H);  $^{13}\text{C}$   $\{^1\text{H}\}$  NMR (125 MHz, DMSO- $d_6$ )  $\delta$  152.5, 128.5, 127.6, 112.9, 52.1, 33.5, 25.2, 24.7.

**4-amino-N-cyclopentylbenzenesulfonamide (3at).**<sup>13</sup> Purified by flash column chromatography on silica gel (hexanes/ethyl acetate = 2/1); White solid; 56% yield (67 mg); mp 104-105 °C;  $^1\text{H}$  NMR (500 MHz, DMSO- $d_6$ )  $\delta$  7.41 (d,  $J = 8.4$  Hz, 2H), 7.10 (t,  $J = 7.0$  Hz, 1H), 6.59 (d,  $J = 8.4$  Hz, 2H), 5.88 (s, 2H), 3.28 (q,  $J = 6.7$  Hz, 1H), 1.57-1.50 (m, 4H), 1.35-1.34 (m, 2H), 1.30-1.23 (m, 2H);  $^{13}\text{C}$   $\{^1\text{H}\}$  NMR (125 MHz, DMSO- $d_6$ )  $\delta$  152.6, 128.7, 126.9, 112.9, 54.6, 32.7, 23.1.

**4-amino-N-benzyl-3-bromobenzenesulfonamide (3ba).**<sup>5</sup> Purified by flash column chromatography on silica gel (hexanes/ethyl acetate = 2/1); White solid; 84% yield (143 mg); mp 136-137 °C;  $^1\text{H}$  NMR (500 MHz, DMSO- $d_6$ )  $\delta$  7.85 (t,  $J = 6.4$  Hz, 1H), 7.72 (d,  $J = 2.0$  Hz, 1H), 7.50-7.47 (m, 1H), 7.28-7.21 (m, 5H), 6.86 (d,  $J = 6.6$  Hz, 1H), 6.12 (s, 2H), 3.93 (d,  $J = 6.4$  Hz, 2H);  $^{13}\text{C}$   $\{^1\text{H}\}$  NMR (125 MHz, DMSO- $d_6$ )  $\delta$  149.6, 138.0, 131.4, 128.5, 128.3, 127.9, 127.7, 127.4, 114.5, 106.2, 46.4.

**4-amino-N-benzyl-3,5-dibromobenzenesulfonamide (3ca).**<sup>5</sup> Purified by flash column chromatography on silica gel (hexanes/ethyl acetate = 2/1); White solid; 81% yield (170 mg); mp 183-184 °C;  $^1\text{H}$  NMR (500 MHz, DMSO- $d_6$ )  $\delta$  8.02 (t,  $J = 6.4$  Hz, 1H), 7.71 (s, 2H), 7.28-7.21 (m,

5H), 6.12 (s, 2H), 3.97 (d,  $J = 6.4$  Hz, 2H);  $^{13}\text{C}$   $\{^1\text{H}\}$  NMR (125 MHz, DMSO- $d_6$ )  $\delta$  146.5, 137.7, 130.6, 129.1, 128.4, 127.9, 127.4, 106.6, 46.5.

**4-amino-N-benzyl-3-chlorobenzenesulfonamide (3da).** Purified by flash column chromatography on silica gel (hexanes/ethyl acetate = 2/1); White solid; 83% yield (123 mg); mp 103-104 °C;  $^1\text{H}$  NMR (500 MHz, DMSO- $d_6$ )  $\delta$  7.84 (t,  $J = 6.3$  Hz, 1H), 7.57-7.55 (m, 1H), 7.45-7.43 (m, 1H), 7.28-7.23 (m, 5H), 6.86 (d,  $J = 8.6$  Hz, 1H), 6.19 (s, 2H), 3.92 (d,  $J = 6.5$  Hz, 2H);  $^{13}\text{C}$   $\{^1\text{H}\}$  NMR (125 MHz, DMSO- $d_6$ )  $\delta$  148.6, 138.0, 128.5, 128.2, 127.9, 127.4, 127.1, 117.4, 116.2, 114.6, 46.4. HRMS (ESI)  $m/z$  calcd for  $\text{C}_{13}\text{H}_{14}\text{ClN}_2\text{O}_2\text{S}^+[\text{M}^+\text{H}^+]$  297.0465 found 297.0464.

**4-amino-N-benzyl-3,5-dichlorobenzenesulfonamide (3ea).**<sup>5</sup> Purified by flash column chromatography on silica gel (hexanes/ethyl acetate = 2/1); White solid; 86% yield (142 mg); mp 184-185 °C;  $^1\text{H}$  NMR (500 MHz, DMSO- $d_6$ )  $\delta$  8.02 (t,  $J = 6.1$  Hz, 1H), 7.56 (s, 2H), 7.27-7.20 (m, 5H), 6.34 (s, 2H), 3.98 (d,  $J = 6.5$  Hz, 2H);  $^{13}\text{C}$   $\{^1\text{H}\}$  NMR (125 MHz, DMSO- $d_6$ )  $\delta$  144.9, 137.7, 128.4, 128.0, 127.8, 127.4, 126.9, 117.5, 46.5.

**3-amino-N-benzylbenzenesulfonamide (3fa).**<sup>5</sup> Purified by flash column chromatography on silica gel (hexanes/ethyl acetate = 2/1); White solid; 85% yield (111 mg); mp 71-72 °C;  $^1\text{H}$  NMR (500 MHz, DMSO- $d_6$ )  $\delta$  7.95 (t,  $J = 6.4$  Hz, 1H), 7.32-7.18 (m, 6H), 7.04 (s, 1H), 6.93 (d,  $J = 6.5$  Hz, 1H), 6.77 (d,  $J = 8.2$  Hz, 1H), 5.58 (s, 2H), 3.95 (d,  $J = 6.4$  Hz, 2H);  $^{13}\text{C}$   $\{^1\text{H}\}$  NMR (125 MHz, DMSO- $d_6$ )  $\delta$  149.6, 141.4, 138.2, 129.9, 128.5, 127.8, 127.4, 117.5, 113.5, 111.4, 46.4.

**5-amino-N-benzyl-2-methylbenzenesulfonamide (3ga).**<sup>5</sup> Purified by flash column chromatography on silica gel (hexanes/ethyl acetate = 2/1); White solid; 80% yield (111 mg); mp 82-83 °C;  $^1\text{H}$  NMR (500 MHz, DMSO- $d_6$ )  $\delta$  7.99 (t,  $J = 6.4$  Hz, 1H), 7.28 (t,  $J = 6.9$  Hz, 2H), 7.23 (d,  $J = 7.3$  Hz, 3H), 7.14 (d,  $J = 2.4$  Hz, 1H), 6.99 (d,  $J = 8.2$  Hz, 1H), 6.68-6.66 (m, 1H), 5.31 (s, 2H), 3.97 (d,  $J = 6.2$  Hz, 2H), 2.37 (s, 3H);  $^{13}\text{C}$   $\{^1\text{H}\}$  NMR (125 MHz, DMSO- $d_6$ )  $\delta$  147.1, 139.0, 138.5, 133.2, 128.4, 127.7, 127.4, 122.3, 117.6, 114.1, 46.1, 19.0.

**2-amino-N-benzylbenzenesulfonamide (3ha).**<sup>5</sup> Purified by flash column chromatography on silica gel (hexanes/ethyl acetate = 2/1); White solid; 76% yield (100 mg); mp 55-56 °C;  $^1\text{H}$  NMR (500 MHz, DMSO- $d_6$ )  $\delta$  8.06 (t,  $J = 5.9$  Hz, 1H), 7.53 (d,  $J = 7.9$  Hz, 1H), 7.29-7.21 (m, 6H), 6.83 (t,  $J = 8.3$  Hz,



1H), 6.61 (t,  $J = 7.6$  Hz, 1H), 5.94 (s, 2H), 3.94 (d,  $J = 5.9$  Hz, 2H);  $^{13}\text{C}$   $\{^1\text{H}\}$  NMR (125 MHz, DMSO- $d_6$ )  $\delta$  146.5, 138.0, 133.8, 129.4, 128.5, 127.8, 127.4, 120.3, 117.2, 115.4, 46.0.

**Procedure for the reaction of aminobenzenesulfonamide (1a), benzaldehyde (4) and 2-propanol (5)** (Scheme 6). Under a nitrogen atmosphere, to a 25-mL Schlenk tube were added **1a** (0.5 mmol), **4** (0.6 mmol, 1.2 equiv), **5** (1.5 mmol, 3 equiv), Cp\*Ir@CTF (20 mg, 1 mol % Ir),  $\text{Cs}_2\text{CO}_3$  (1 equiv) and *tert*-amyl alcohol (1 mL). The mixture was heated at 125 °C for 12 h and was then allowed to cool to ambient temperature. The reaction mixture was concentrated in vacuo and purified by flash column chromatography with hexanes/ethyl acetate to afford the corresponding product **3aa** in 82% yield (108 mg).

**Procedure for the synthesis of 4-amino-N-phenethylbenzenesulfonamide (7)**. Under a nitrogen atmosphere, to a 25-mL Schlenk tube were added **1a** (1.72 g, 10 mmol), **6** (1.46 g, 12 mmol, 1.2 equiv), Cp\*Ir@CTF (400 mg, 1 mol % Ir),  $\text{Cs}_2\text{CO}_3$  (3.26 g, 10 mmol, 1 equiv) and *tert*-amyl alcohol (10 mL). The mixture was heated at 125 °C for 12 h and was then allowed to cool to ambient temperature. The reaction mixture was concentrated in vacuo and purified by flash column chromatography with hexanes/ethyl acetate to afford the corresponding product.

**4-amino-N-phenethylbenzenesulfonamide (7)**.<sup>13</sup> Purified by flash column chromatography on silica gel (hexanes/ethyl acetate = 2/1); White solid, 81% yield (2.24 g); mp 130-131 °C;  $^1\text{H}$  NMR (500 MHz, DMSO- $d_6$ )  $\delta$  7.42 (d,  $J = 8.6$  Hz, 2H), 7.26 (t,  $J = 7.4$  Hz, 2H), 7.21-7.17 (m, 2H), 7.14 (d,  $J = 7.2$  Hz, 2H), 6.62 (d,  $J = 8.6$  Hz, 2H), 5.92 (s, 2H), 2.87 (q,  $J = 6.7$  Hz, 2H), 2.65 (t,  $J = 7.6$  Hz, 2H);  $^{13}\text{C}$   $\{^1\text{H}\}$  NMR (125 MHz, DMSO- $d_6$ )  $\delta$  152.7, 139.2, 128.9, 128.8, 128.6, 126.5, 125.6, 113.0, 44.4, 35.5.

**Procedure for the synthesis of 4-(3-chloro-1,4-dioxo-1,4-dihydronaphthalen-2-ylamino)-N-phenethylbenzenesulfonamide (9)**. In a round-bottomed flask with a condenser tube were added **7** (1.38 g, 5 mmol), **8** (1.14 g, 5 mmol) and ethanol (20 mL). The mixture was heated under reflux for 24 h and was then allowed to cool to ambient temperature. The reaction mixture was concentrated in vacuo and purified by flash column chromatography with hexanes/ethyl acetate to afford the corresponding product.

**4-((3-chloro-1,4-dioxo-1,4-dihydronaphthalen-2-yl)amino)-N-phenethylbenzenesulfonamide**

**(9).**<sup>14</sup> Purified by flash column chromatography on silica gel (hexanes/ethyl acetate = 2/1); Orange solid, 56% yield (1.30 g); <sup>1</sup>H NMR (500 MHz, DMSO-d<sub>6</sub>) δ 9.54 (s, 1H), 8.05 (d, *J* = 7.5 Hz, 2H), 7.88 (t, *J* = 7.4 Hz, 1H), 7.83 (t, *J* = 7.4 Hz, 1H), 7.70 (d, *J* = 8.6 Hz, 2H), 7.62 (d, *J* = 5.7 Hz, 1H), 7.28-7.17 (m, 5H), 7.15 (d, *J* = 7.3 Hz, 2H), 2.97 (q, *J* = 6.6 Hz, 2H), 2.66 (t, *J* = 7.5 Hz, 2H); <sup>13</sup>C {<sup>1</sup>H} NMR (125 MHz, DMSO-d<sub>6</sub>) δ 180.2, 177.2, 143.1, 143.0, 139.0, 135.0, 134.8, 133.8, 132.0, 130.7, 128.9, 128.6, 127.0, 126.9, 126.5, 122.8, 118.7, 44.4, 35.5.

## References

- (1) R. G. Ball, W. A. G. Graham, D. M. Heinekey, J. K. Hoyano, A. D. McMaster, B. M. Mattson and S. T. Michel, *Inorg. Chem.*, 1990, **29**, 2023-2025.
- (2) R. Ziessel, *J. Chem. Soc. Chem. Commun.*, 1988, **1**, 16-17.
- (3) M. Soorholtz, L. C. Jones, D. Samuelis, C. Weidenthaler, R. J. White, M. Titirici, D. A. Cullen, T. Zimmermann, M. Antonietti, J. Maier, R. Palkovits, B. F. Chmelka and F. Schüth, *ACS Catal.*, 2016, **6**, 2332-2340.
- (4) E. M. Bissinger, R. Heinke, A. Spannhoff, A. Eberlin, E. Metzger, V. Cura, P. Hassenboehler, J. Cavarelli, R. Schule, M. T. Bedford, W. Sippl and M. Jung, *Bioorg. Med. Chem.*, 2011, **19**, 3717-3731.
- (5) L. Lu, J. Ma, P. Qu and F. Li, *Org. Lett.*, 2015, **17**, 2350-2353.
- (6) P. Wang, C. Liu, T. Sanches, Y. Zhong, B. Liu, J. Xiong, N. Neamati and G. Zhao, *Bioorg. Med. Chem. Lett.*, 2009, **19**, 4574-4578.
- (7) Y. S. Lai, F. Wang, Y. Zou, Q. Xu, W. J. Guo, Y. Wang, Q. R. Sun and Y. Z. Li, WO2018161892, **2018**.
- (8) F. Habens, N. Srinivasan, F. Oakley, D. A. Mann, A. Ganesan and G. Packham, *Apoptosis*, 2005, **10**, 481-491.
- (9) Lukin, V. Gramlich, R. Kandre, I. Zhun, T. Felder, C. A. Schalley and G. Dolgonos, *J. Am. Chem. Soc.*, 2006, **128**, 8964-8974.
- (10) P. G. Baraldi, A. R. Moorman and P. A. Borea, US 20090233878, **2009**.
- (11) D. Rennison, D. Conole, M. D. Tingle, J. Yang, C. T. Eason and M. A. Brimble, *Bioorg. Med. Chem. Lett.*, 2013, **23**, 6629-6635.
- (12) P. G. Baraldi, A. R. Moorman, and P. A. Borea, WO 2005028489, **2005**.
- (13) M. Schlitzer, M. Bohm, I. Sattler and H. M. Dahse, *Bioorg. Med. Chem.*, 2000, **8**, 1991-2006.
- (14) R. Pingaew, V. Prachayasittikul, A. Worachartcheewan, C. Nantasenamat, S. Prachayasittikul, S. Ruchirawat and V. Prachayasittikul, *Eur. J. Med. Chem.*, 2015, **103**, 446-459.

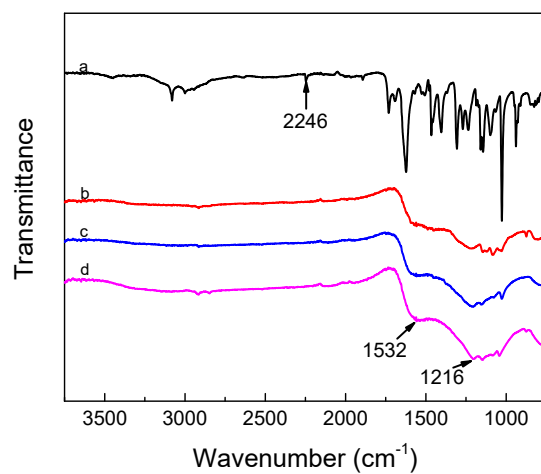

**Fig. S1.** FT-IR spectra of (a) 2,5-pyridinedicarbonitrile; (b) CTF; (c) Cp\*Ir@CTF; (d) recovered Cp\*Ir@CTF.

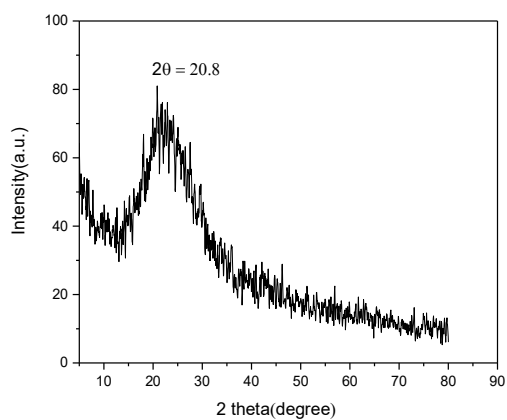

**Fig. S2.** XRD of CTF

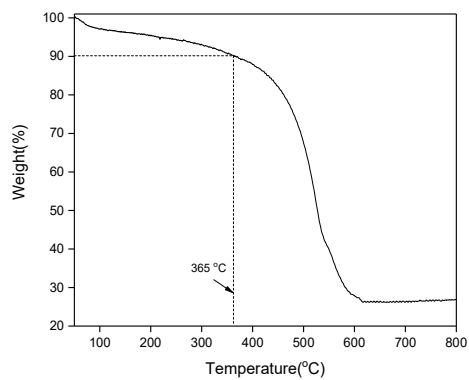

**Fig. S3.** TGA of CTF

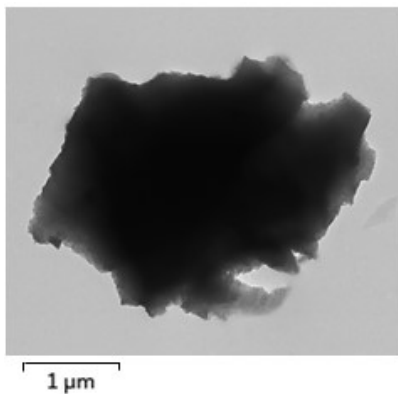

**Fig. S4.** TEM image of CTF.

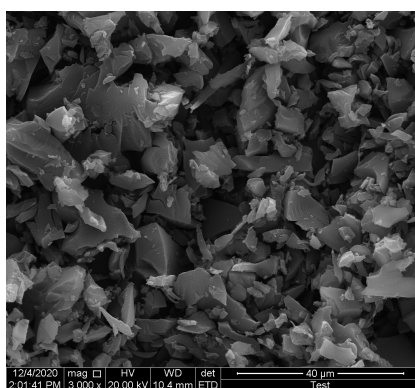

**Fig. S5.** SEM image of CTF.

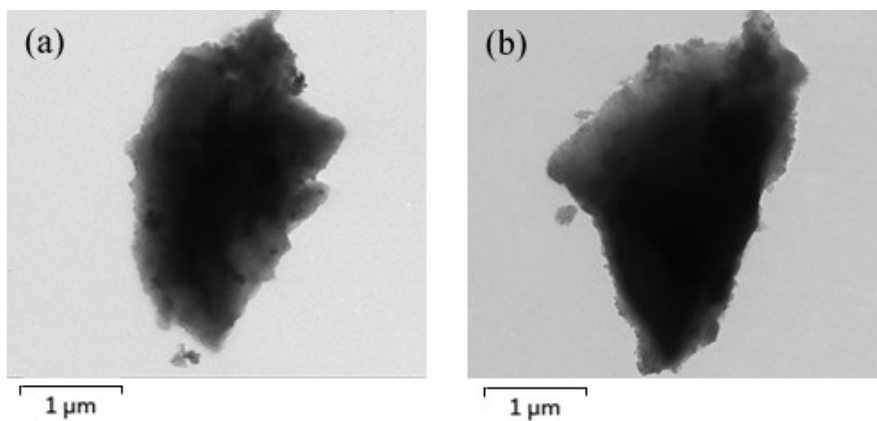

**Fig. S6.** TEM image of Cp\*Ir@CTF (left) and recovered Cp\*Ir@CTF (right).

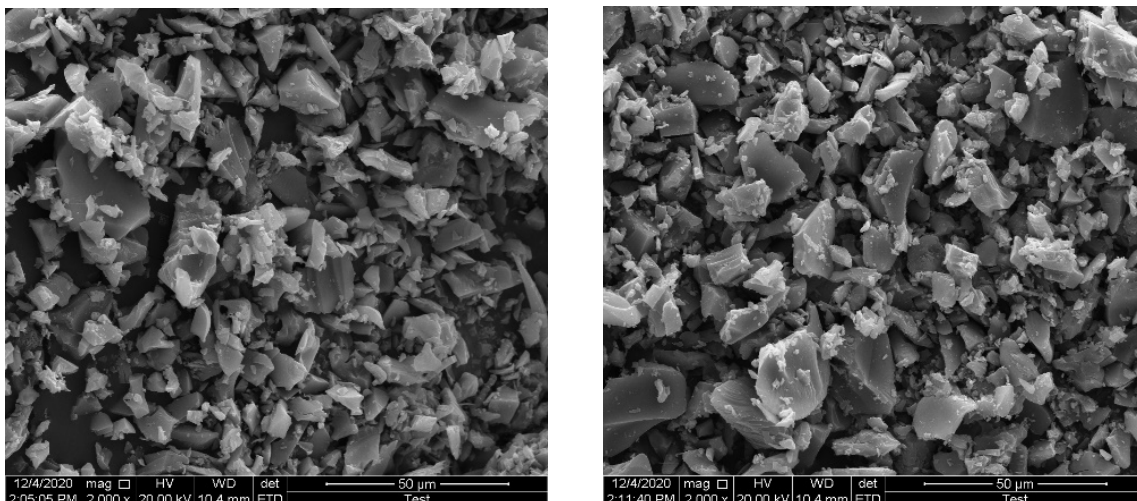

**Fig. S7.** SEM image of Cp\*Ir@CTF (left) and recovered Cp\*Ir@CTF (right).

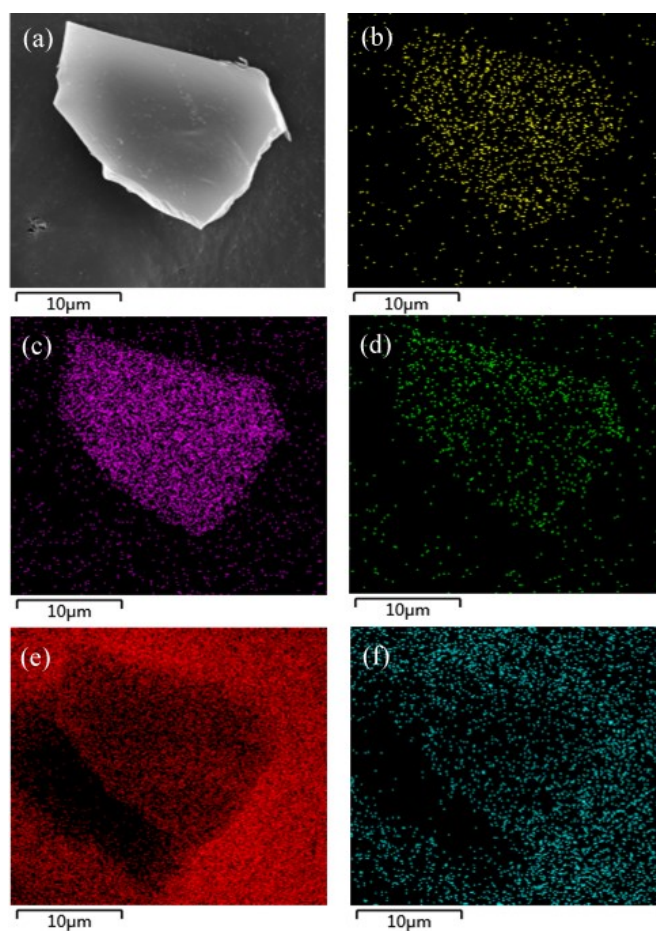

**Fig. S8.** SEM image of Cp\*Ir@CTF (a). EDS mapping of (b) Ir; (c) Cl; (d) N; (e) C and (f) O atoms in Cp\*Ir@CTF.

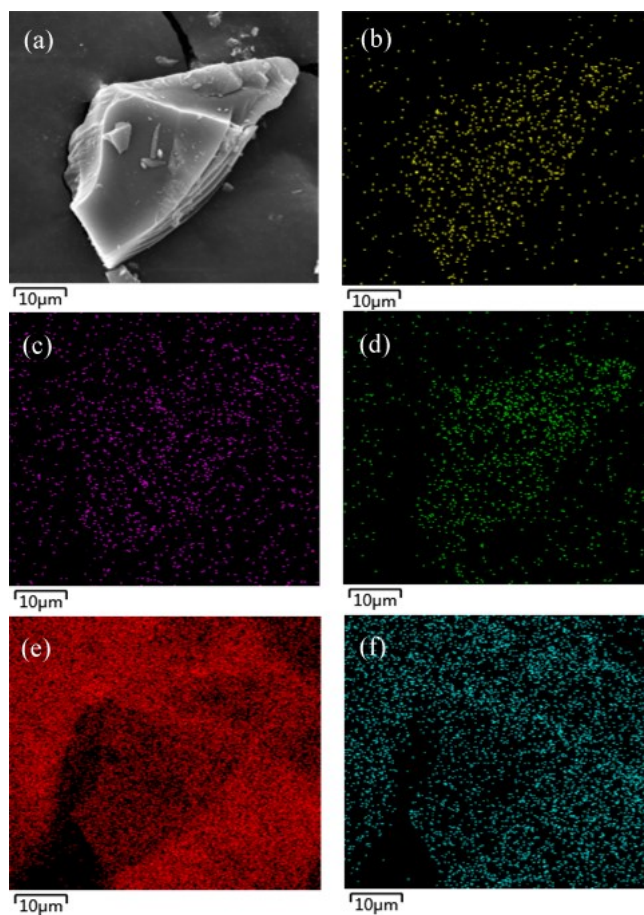

**Fig. S9.** SEM image of recovered Cp\*Ir@CTF (a). EDS mapping of (b) Ir; (c) Cl; (d) N; (e) C and (f) O atoms in recovered Cp\*Ir@CTF.

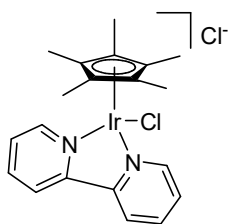

**Fig. S10.** The structure of [Cp\*Ir(bpy)Cl]Cl

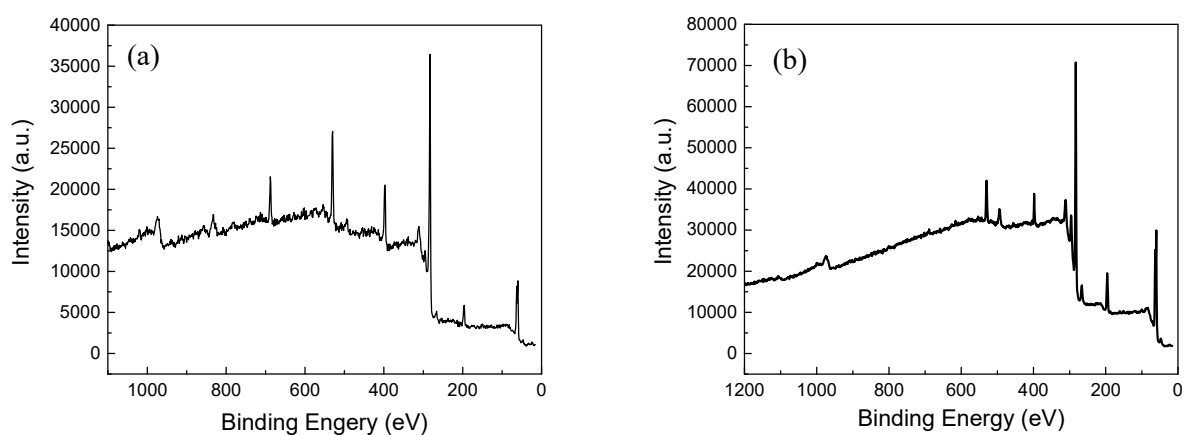

**Fig. S11.** XPS of Cp\*Ir@CTF (a) and [Cp\*Ir(bpy)Cl]Cl (b).

**Table S1.** Atomic composition by SEM-EDS.

| Element | Before catalysis (Wt%) | After 6 cycles (Wt%) |
|---------|------------------------|----------------------|
| C       | 72.41                  | 65.07                |
| N       | 6.34                   | 10.42                |
| O       | 16.34                  | 22.00                |
| Cl      | 1.27                   | 0.03                 |
| Ir      | 3.64                   | 2.47                 |
| Total   | 100.00                 | 100.00               |

**Table S2.** BET analysis of CTF and Cp\*Ir@CTF, and ICP-MS data.

| Material  | $S_{\text{BET}}$ (m <sup>2</sup> /g) | Pore volume (cm <sup>3</sup> /g) | Pore size (nm) | wt% of Ir content |
|-----------|--------------------------------------|----------------------------------|----------------|-------------------|
| CTF       | 623                                  | 0.21                             | 1.38           | —                 |
| Cp*Ir@CTF | 421                                  | 0.12                             | 1.17           | 4.80              |



4-amino-N-benzylbenzenesulfonamide  
Proton DMSO-d6

7.641  
7.628  
7.616  
7.461  
7.444  
7.302  
7.287  
7.273  
7.250  
7.237  
7.223  
7.209  
6.625  
6.607  
— 5.921

3.882  
3.869

— 2.500

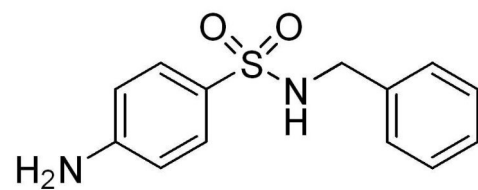

**3aa**

<sup>1</sup>H NMR (500 MHz, DMSO-d6)

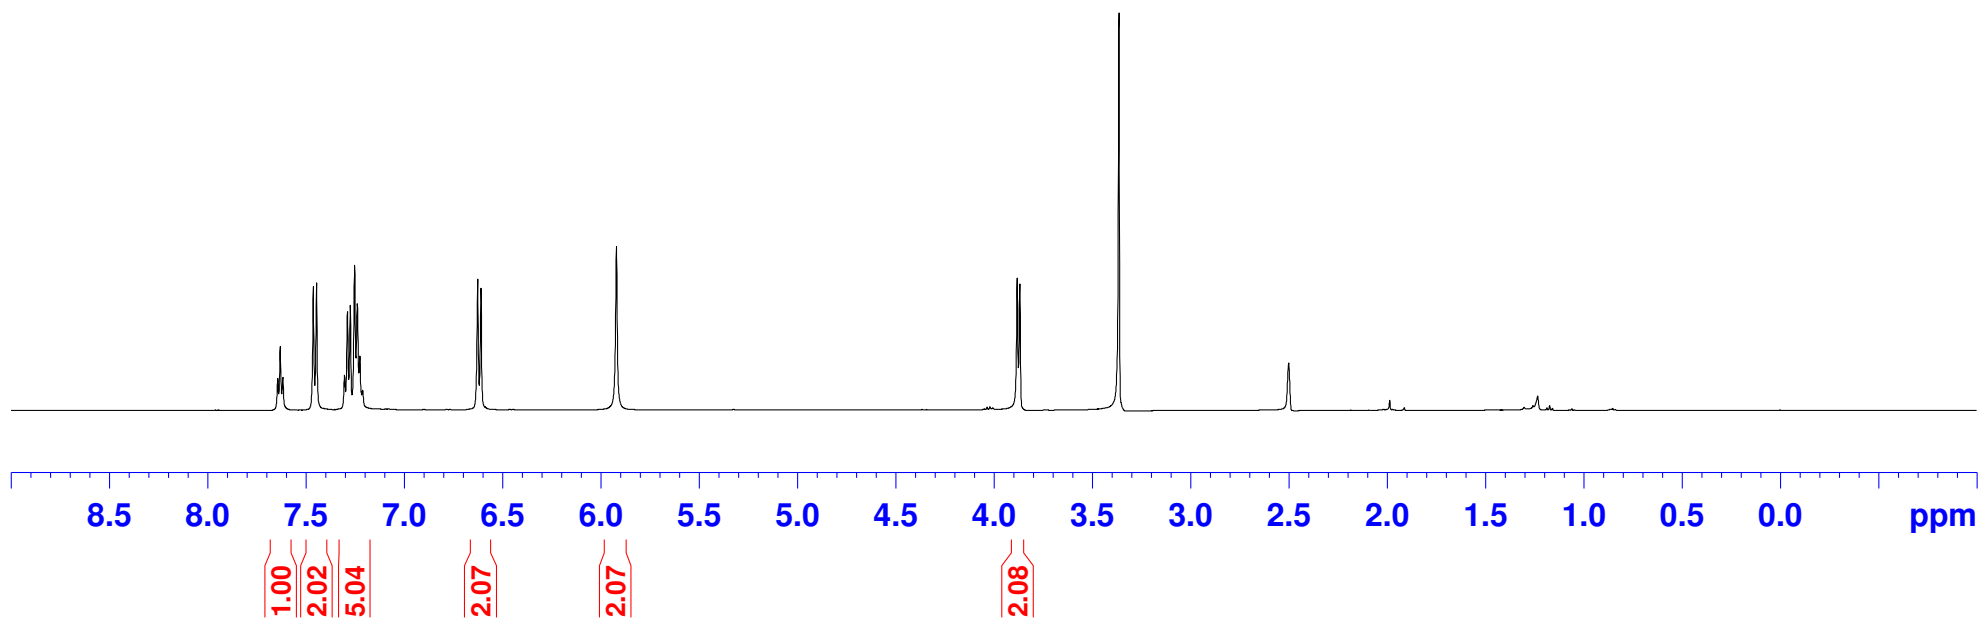

4-amino-N-benzylbenzenesulfonamide  
C13CPD DMSO-d6

— 152.757  
— 138.351  
— 128.762  
— 128.464  
— 127.848  
— 127.298  
— 125.917  
— 112.980

46.388  
40.305  
40.138  
39.971  
39.804  
39.637  
39.470  
39.303

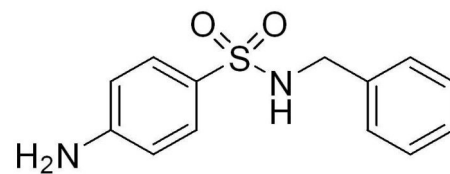

**3aa**

$^{13}\text{C} \{^1\text{H}\}$  NMR (125 MHz, DMSO-d6)

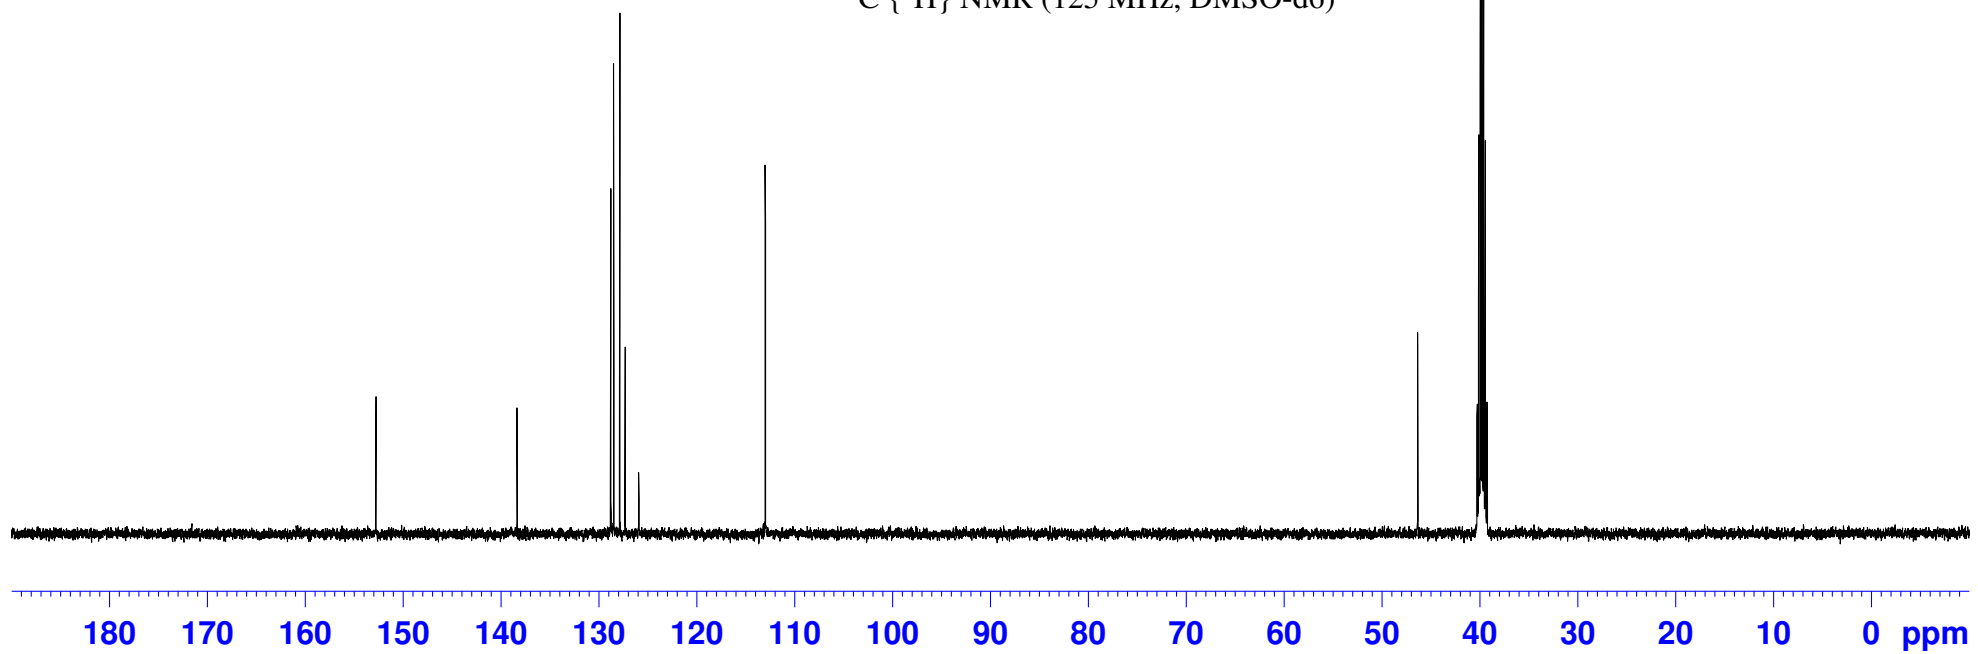

N-(3-methoxybenzyl)-4-aminobenzenesulfonamide  
Proton DMSO-d6

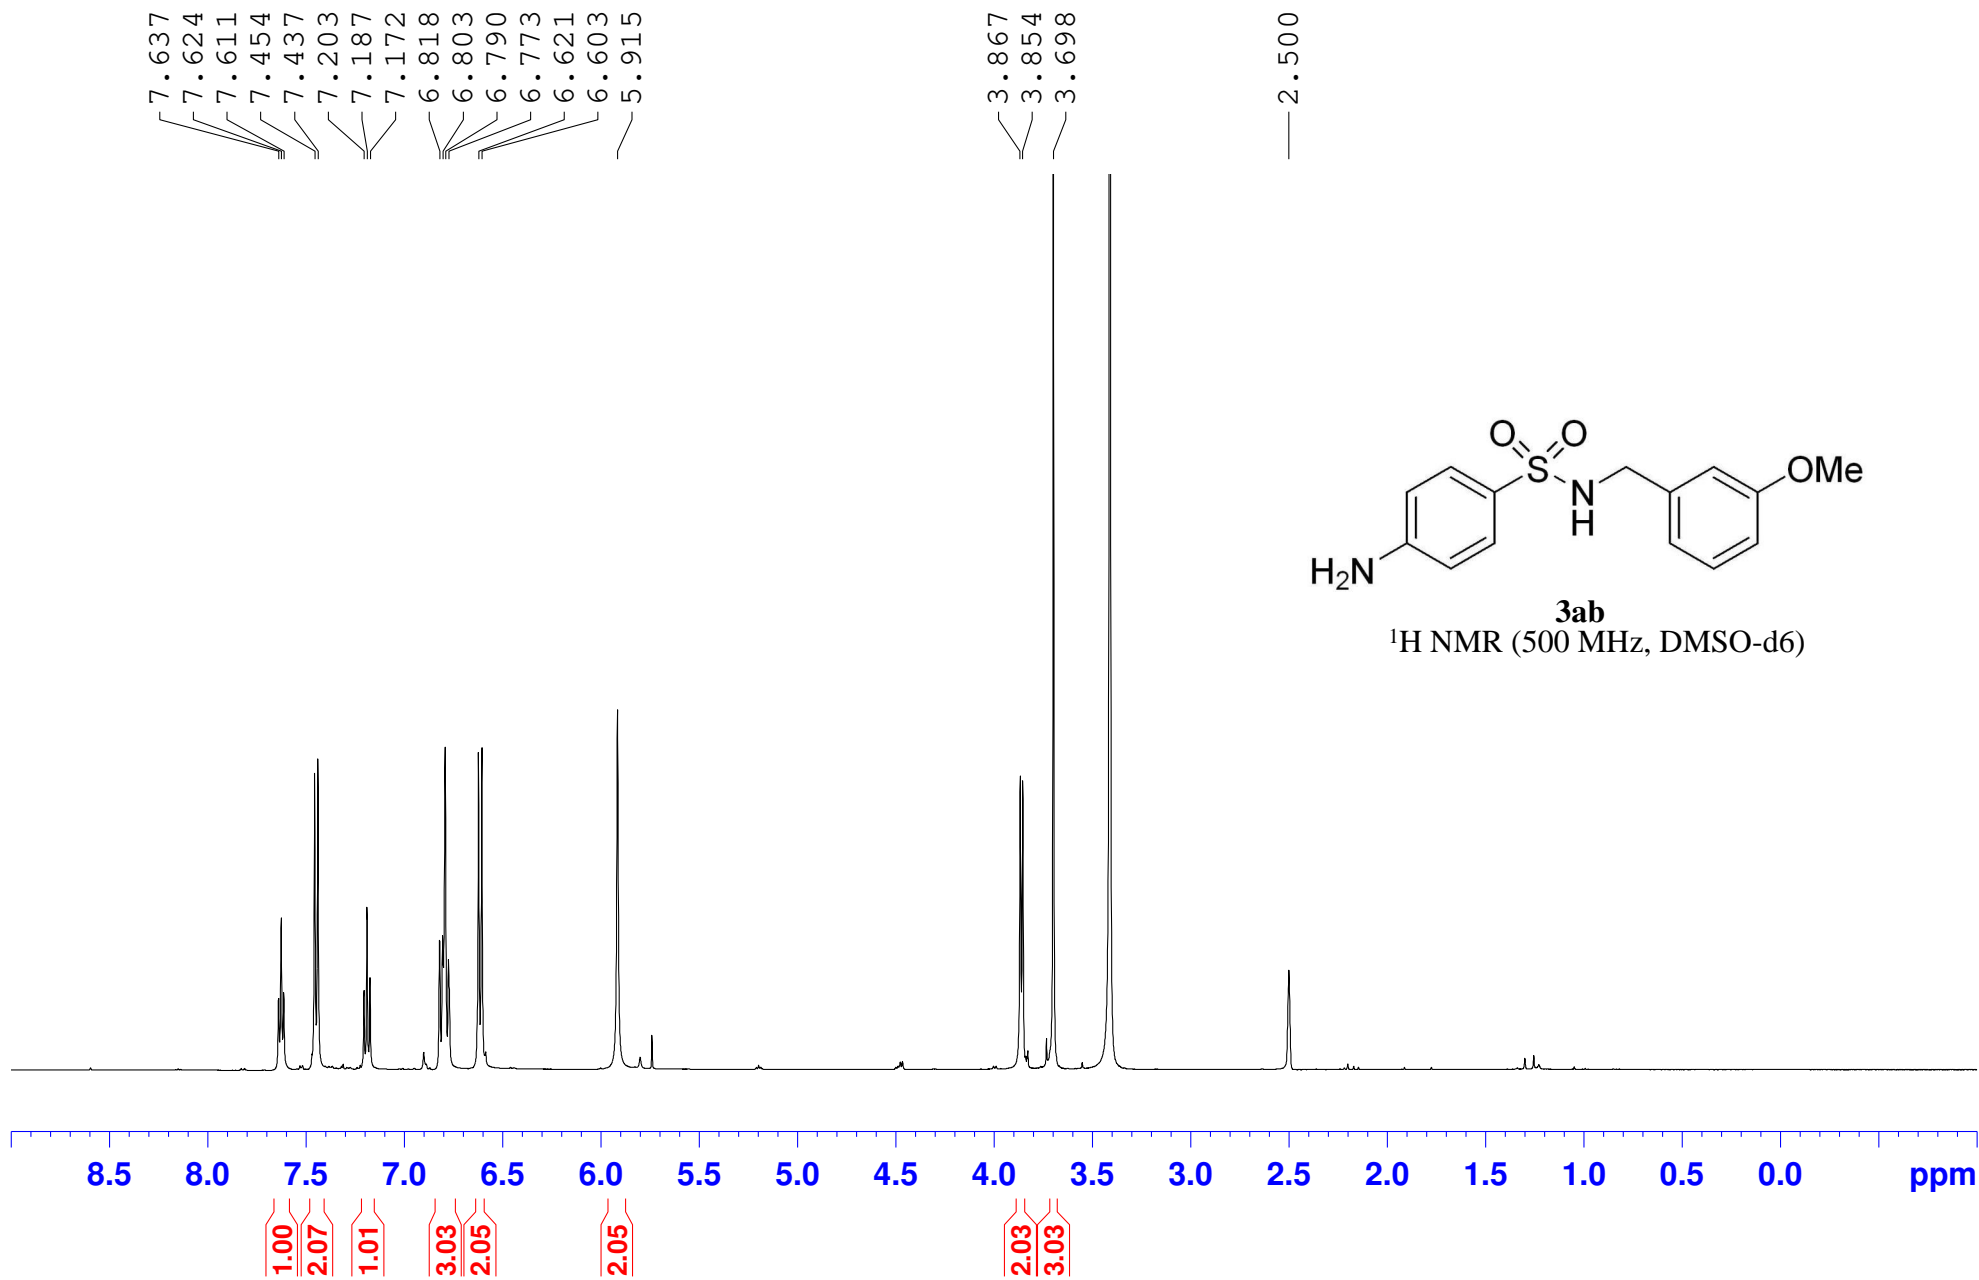

N-(3-methoxybenzyl)-4-aminobenzenesulfonamide  
C13CPD DMSO-d6

— 164.257  
— 157.537  
— 144.690  
— 134.327  
— 133.541  
— 130.743  
— 124.758  
— 117.981  
— 117.764  
— 117.526  
— 60.017  
— 51.103  
— 45.049  
— 44.882  
— 44.715  
— 44.548  
— 44.381  
— 44.214  
— 44.047

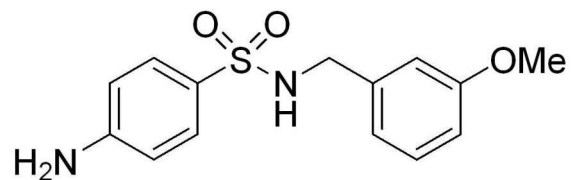

**3ab**

$^{13}\text{C}$  { $^1\text{H}$ } NMR (125 MHz, DMSO-d6)

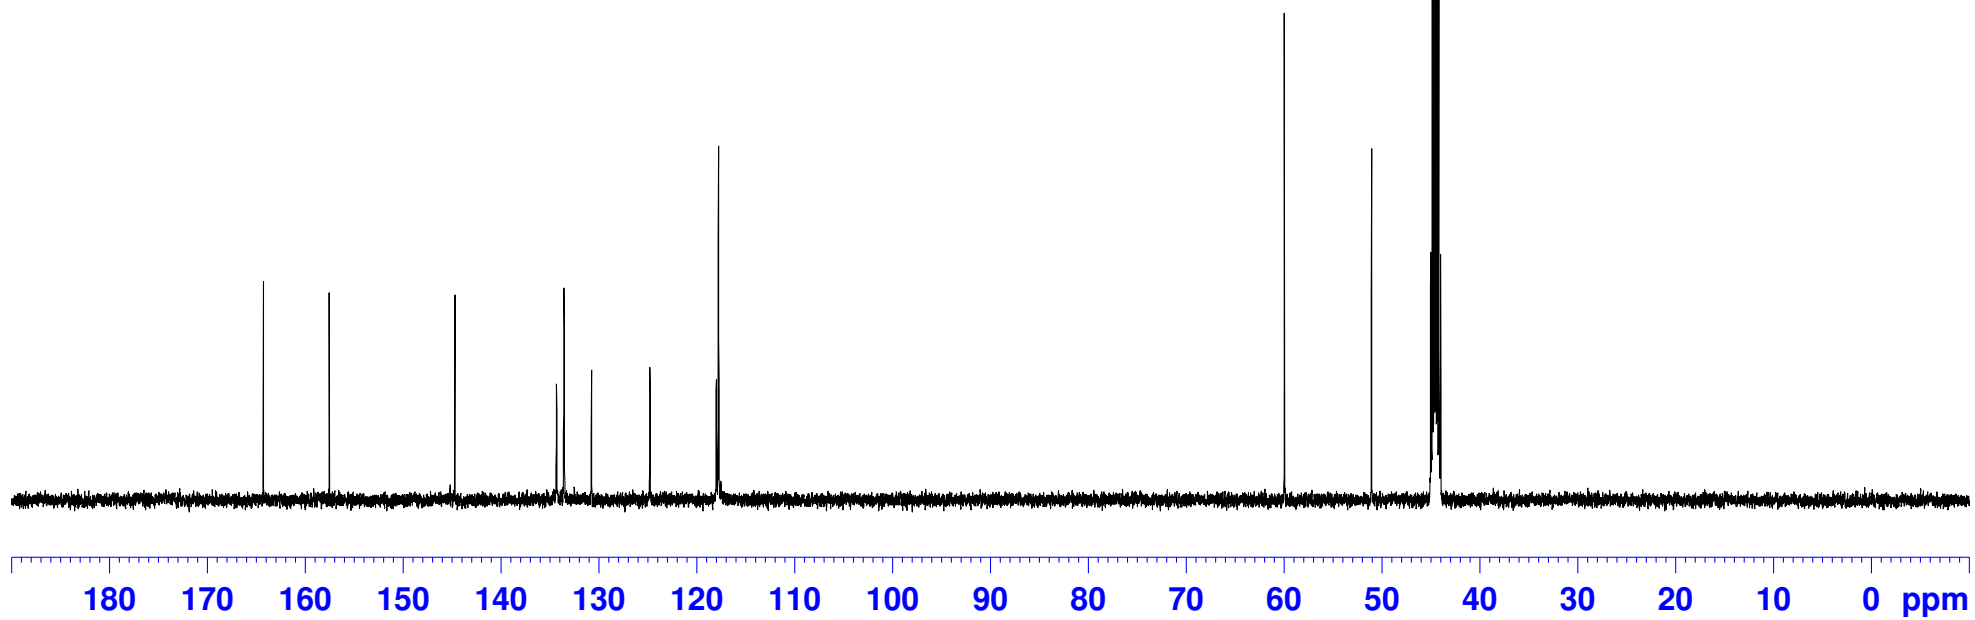

N-(4-methoxybenzyl)-4-aminobenzenesulfonamide  
Proton DMSO-d6

7.543  
7.530  
7.518  
7.445  
7.427  
7.148  
7.130  
6.844  
6.827  
6.620  
6.602  
— 5.906

3.800  
3.787  
3.708  
— 2.500

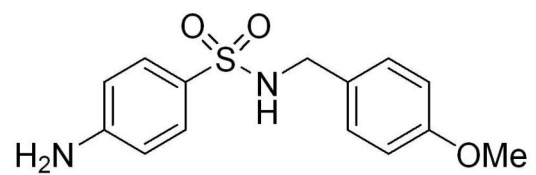

**3ac**  
<sup>1</sup>H NMR (500 MHz, DMSO-d6)

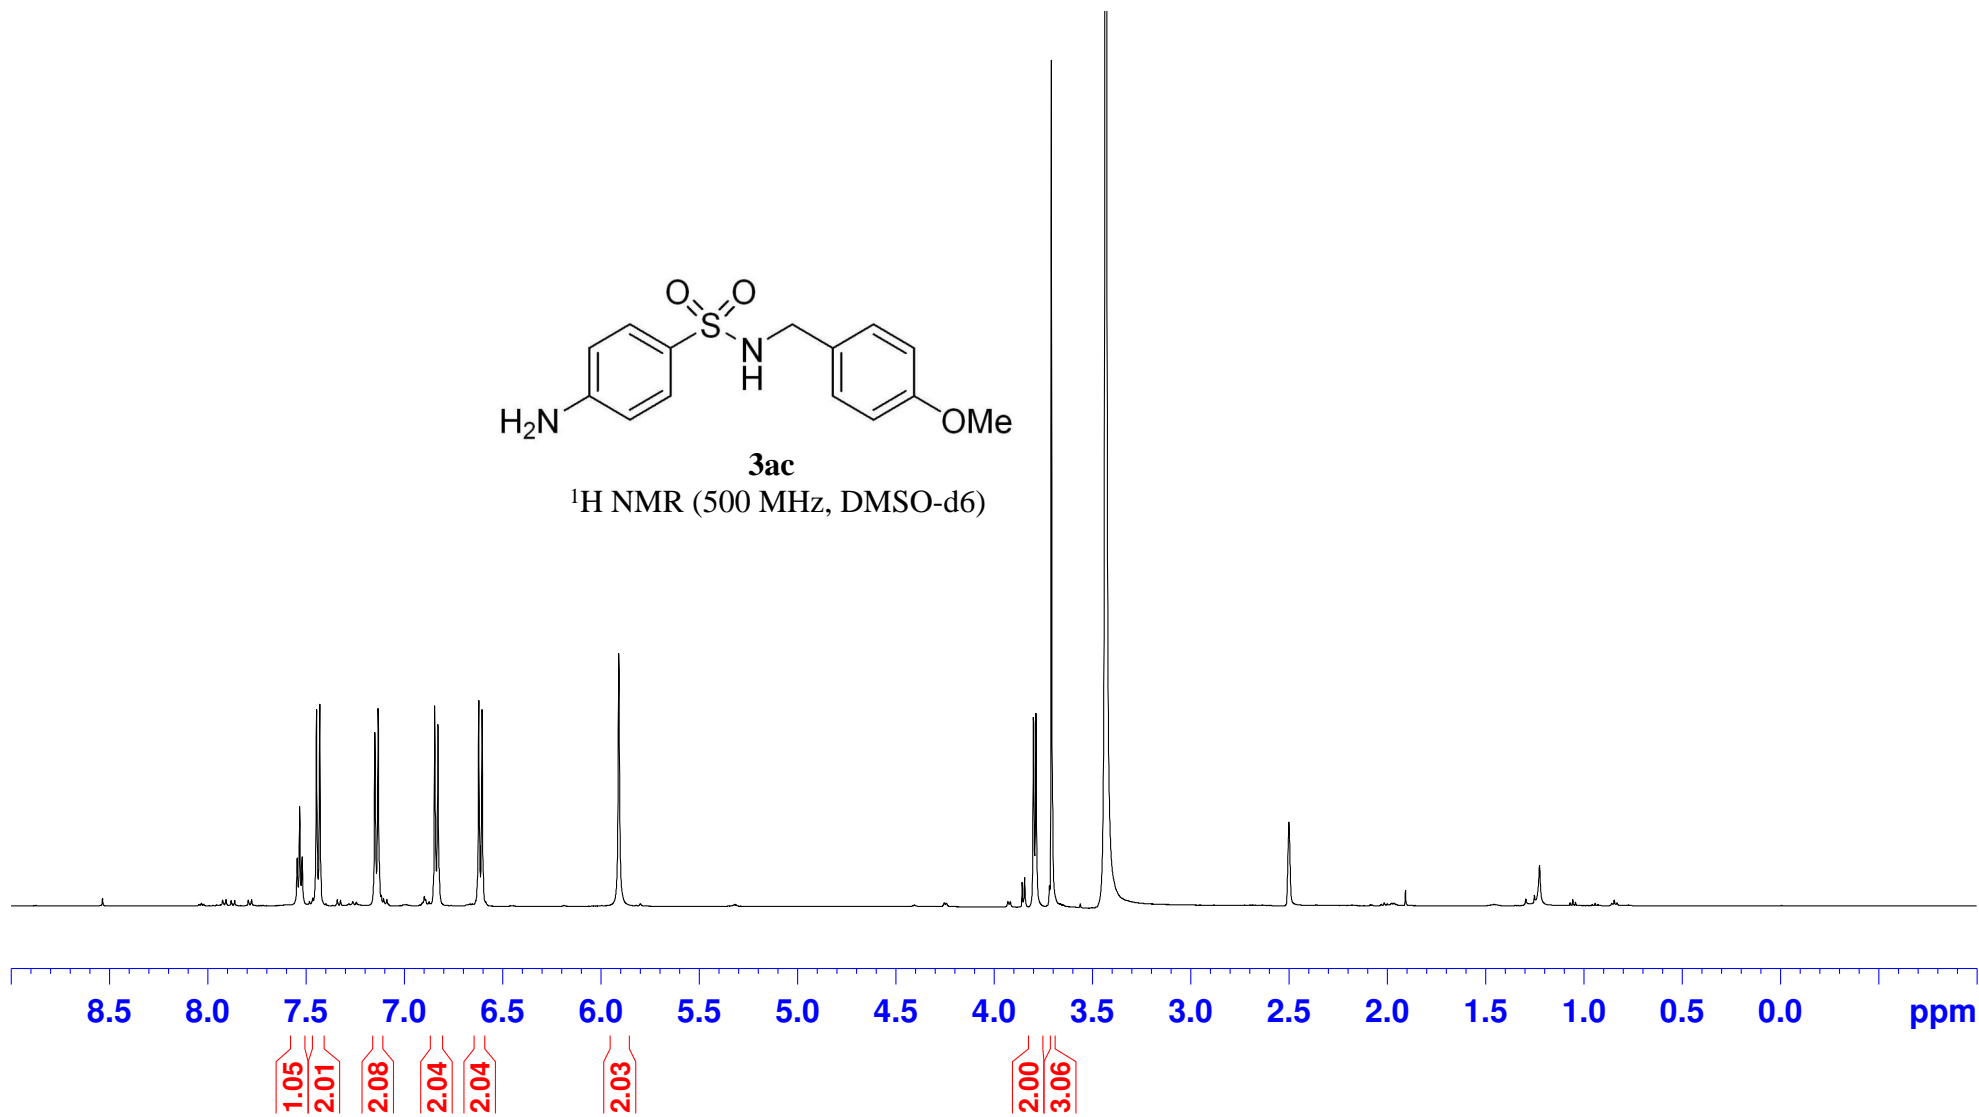

N-(4-methoxybenzyl)-4-aminobenzenesulfonamide  
C13CPD DMSO-d6

— 158.654  
— 152.705

130.139  
129.181  
128.752  
125.953

113.878  
112.980

55.344  
45.908  
40.230  
40.064  
39.985  
39.730  
39.563  
39.395  
39.229

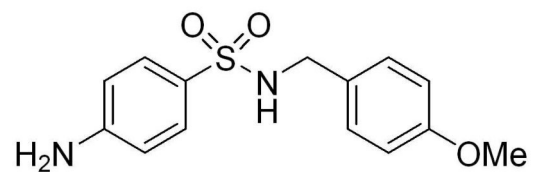

**3ac**

$^{13}\text{C}$  { $^1\text{H}$ } NMR (125 MHz, DMSO-d6)

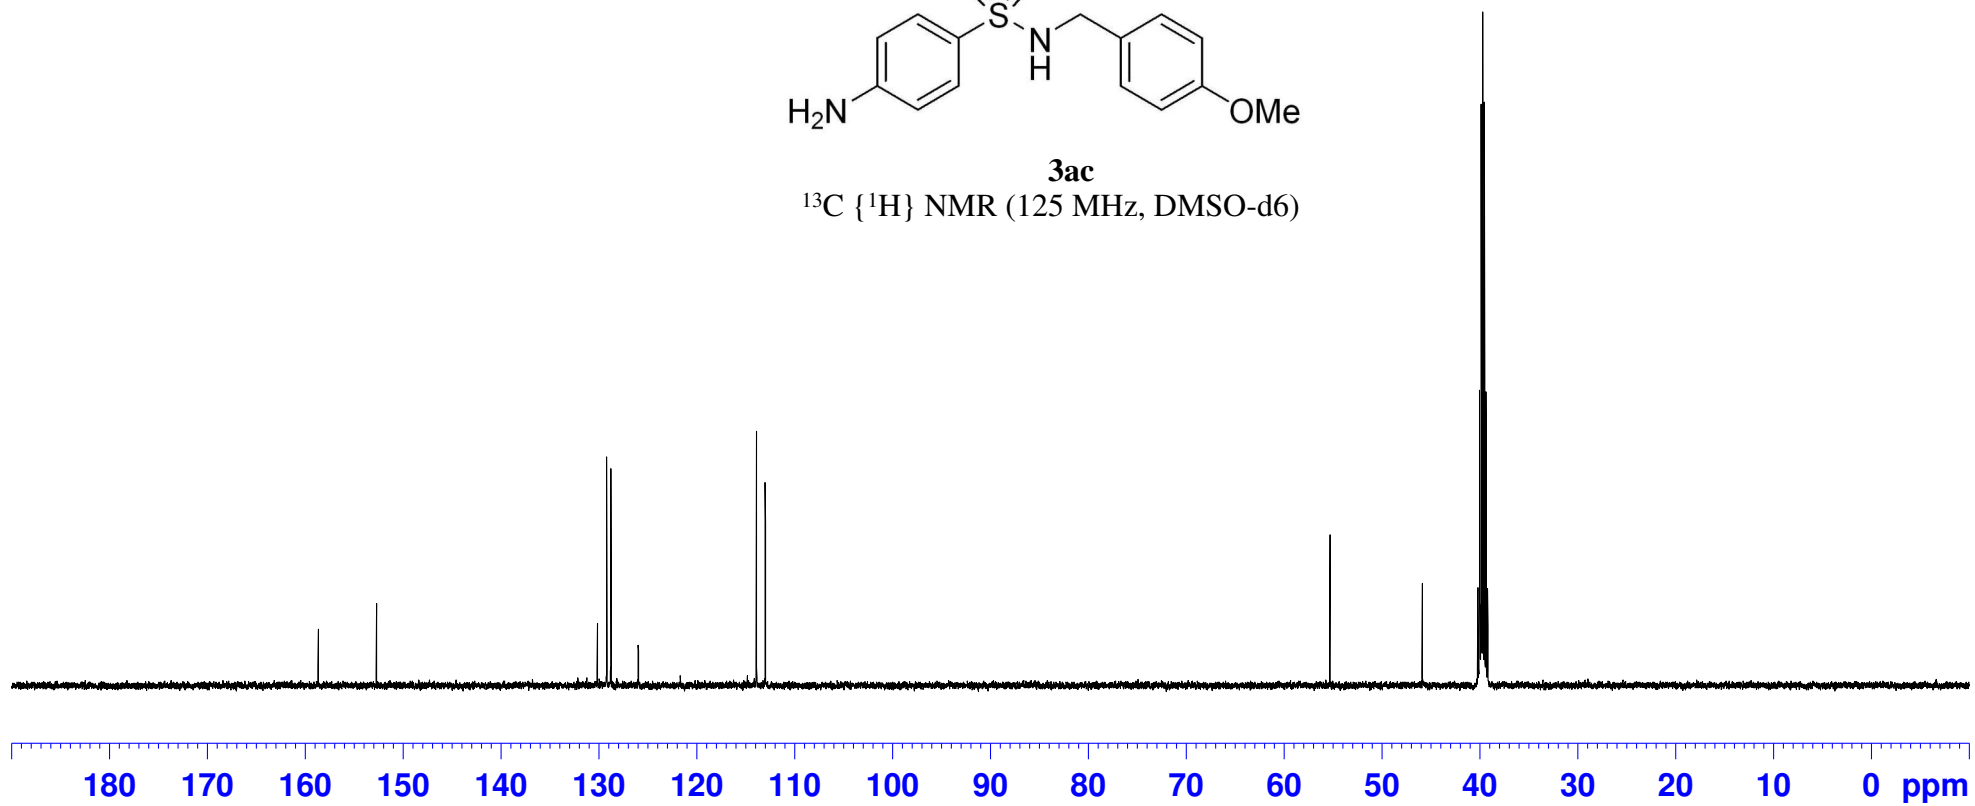

N-(4-methylbenzyl)-4aminobenzenesulfonamide  
Proton DMSO-d6

7.572  
7.559  
7.547  
7.452  
7.435  
7.124  
7.108  
7.093  
7.077  
6.622  
6.605

5.914

3.822  
3.809

2.500  
2.256

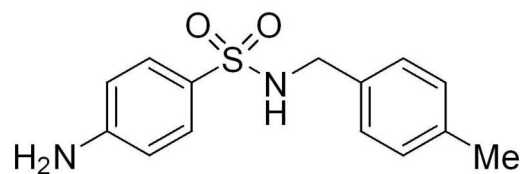

**3ad**

<sup>1</sup>H NMR (500 MHz, DMSO-d6)

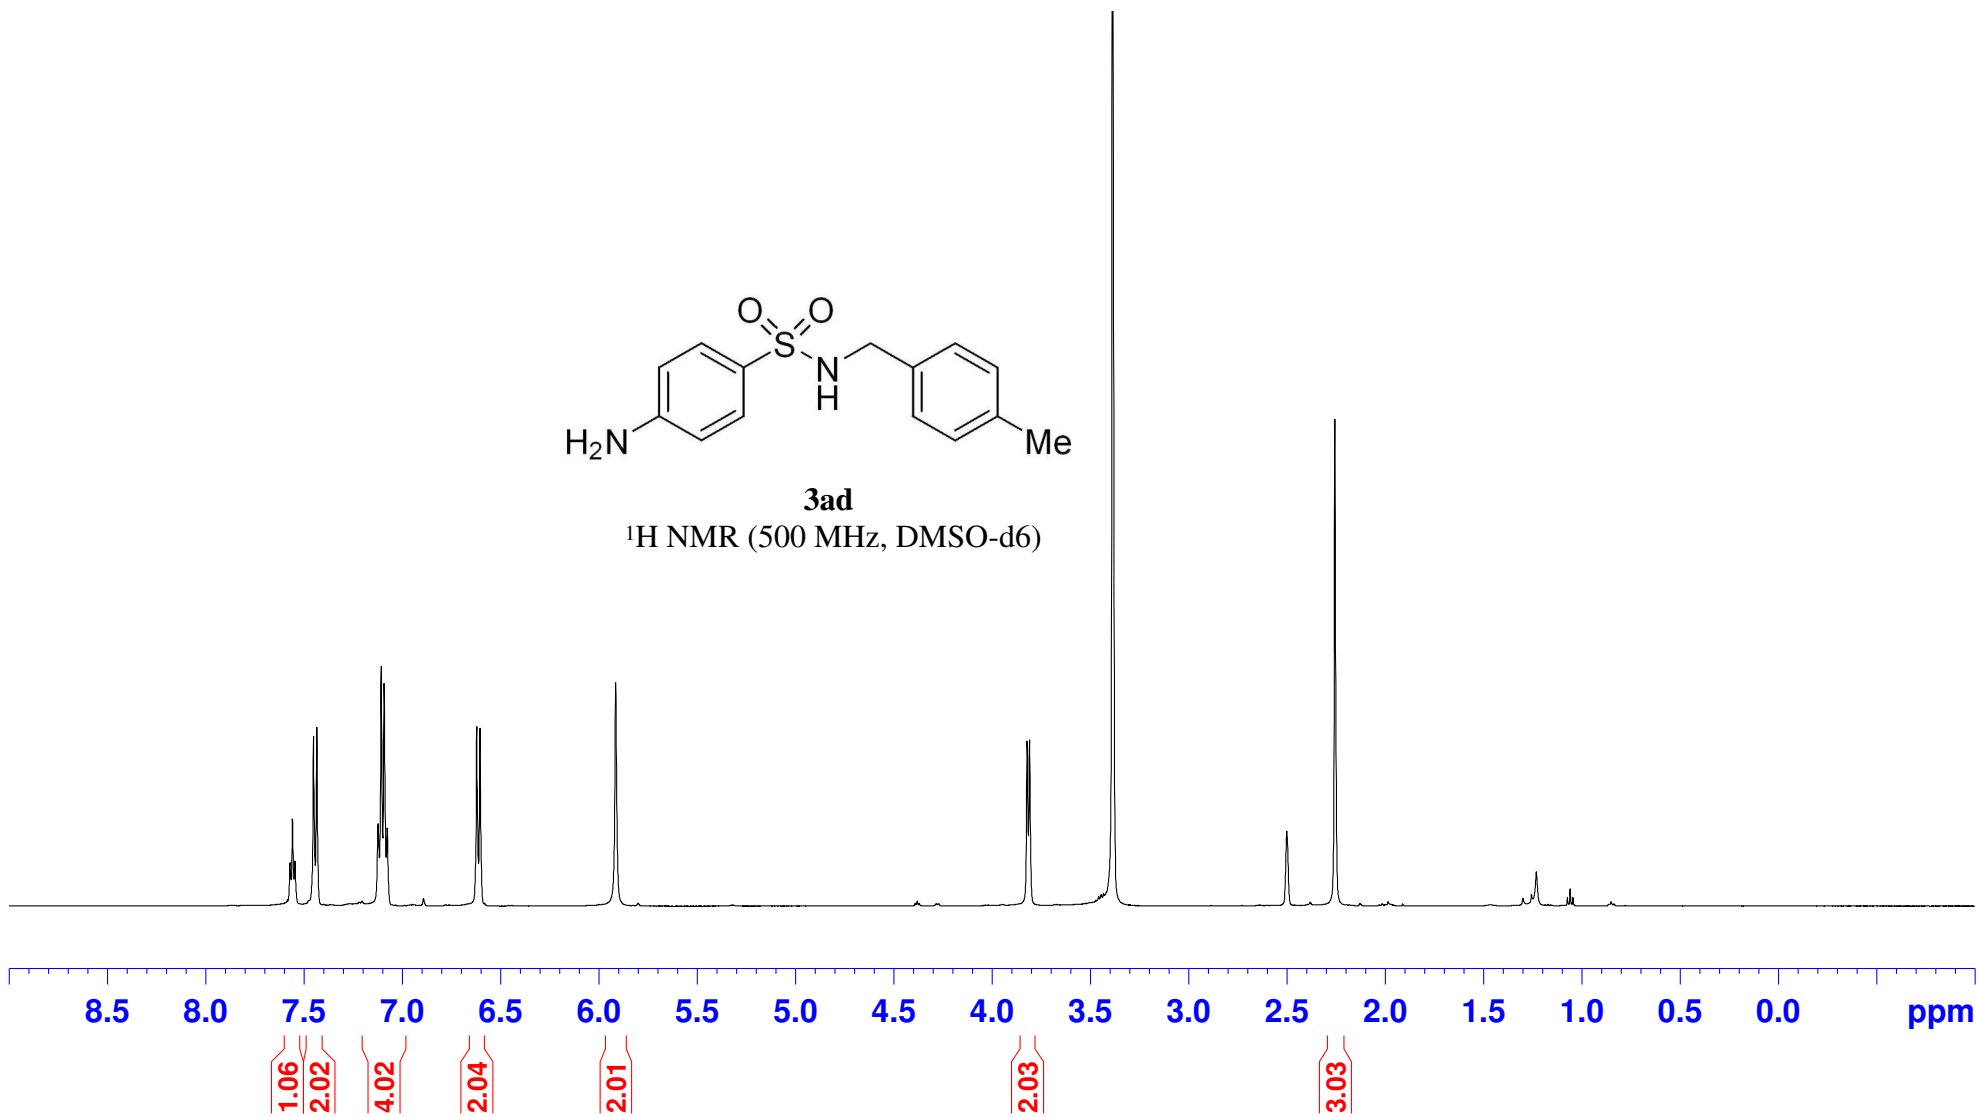

N-(4-methylbenzyl)-4-aminobenzenesulfonamide  
C13CPD DMSO-d6

— 152.742  
— 136.395  
— 135.240  
— 129.019  
— 128.762  
— 127.828  
— 125.896  
— 112.970  
  
— 46.170  
— 40.269  
— 40.100  
— 39.933  
— 39.766  
— 39.599  
— 39.432  
— 39.264  
— 20.948

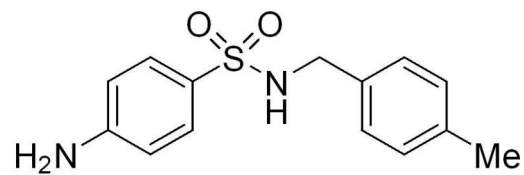

**3ad**

<sup>13</sup>C {<sup>1</sup>H} NMR (125 MHz, DMSO-d6)

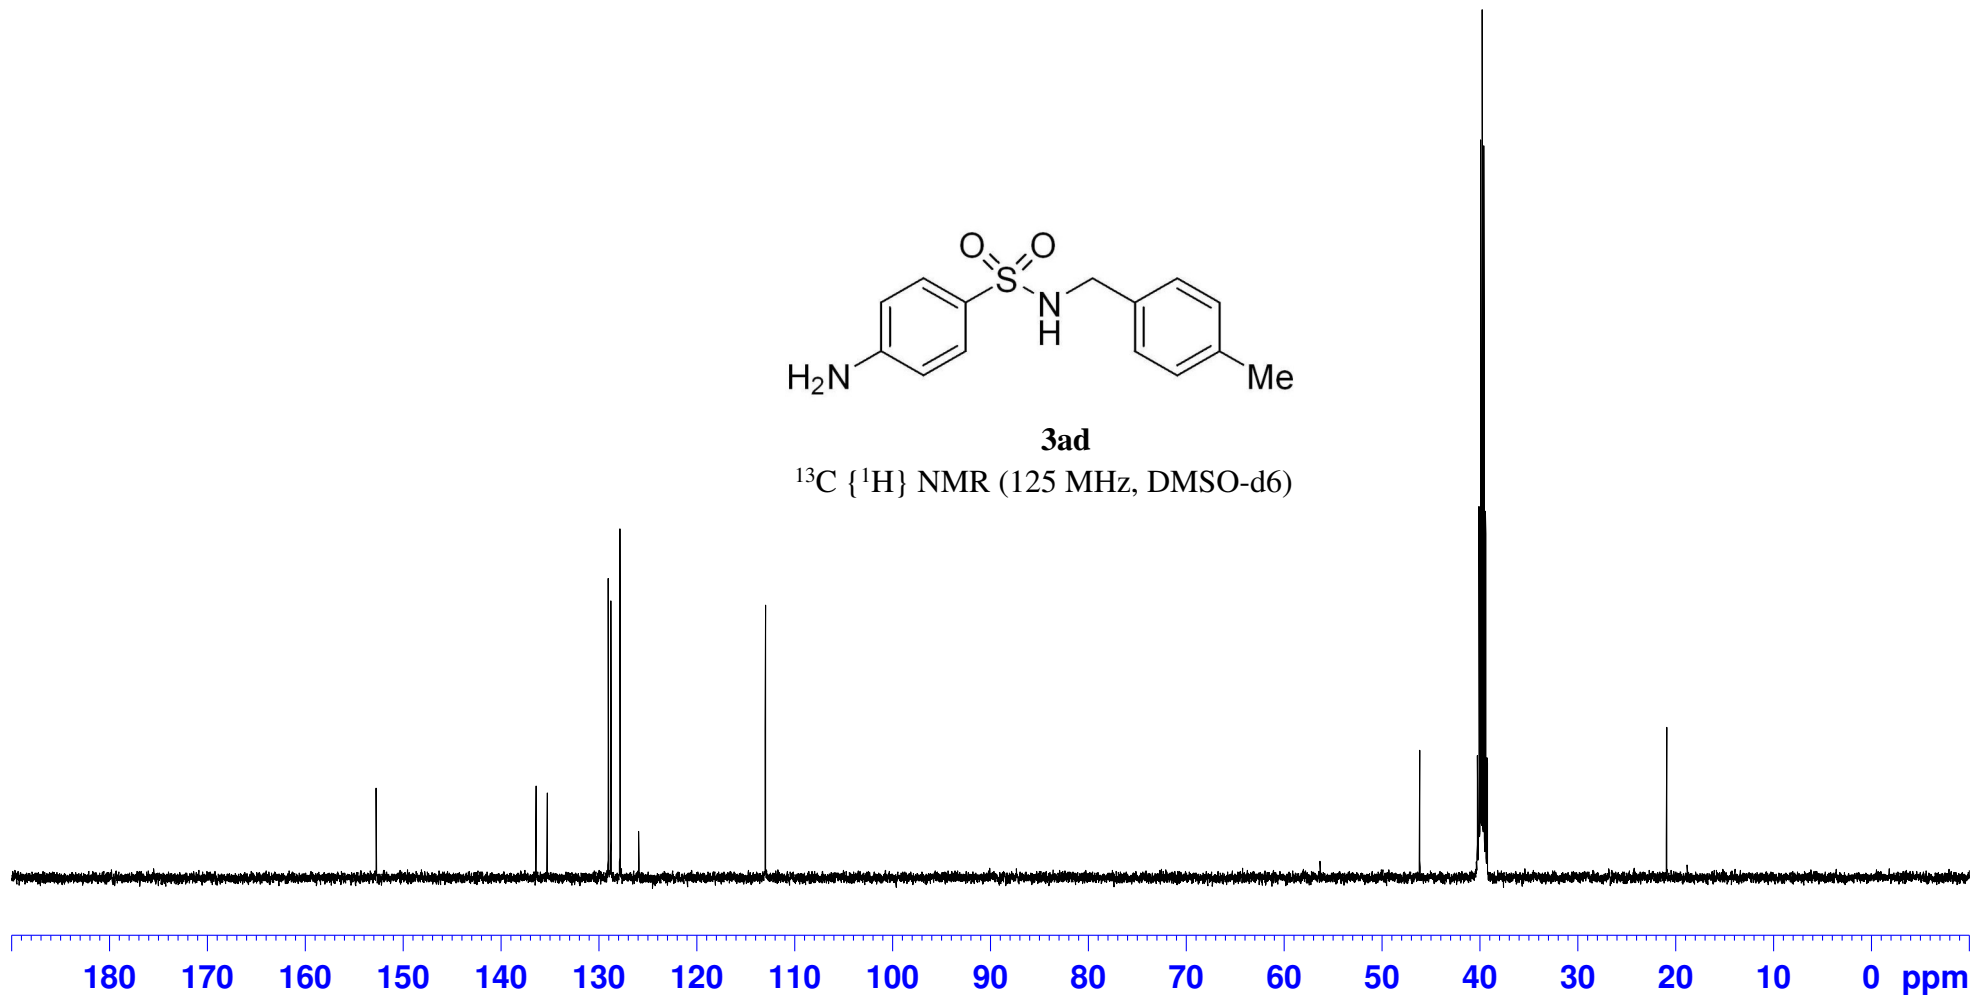



N-(4-isopropylbenzyl)-4-aminobenzenesulfonamide  
Proton DMSO-d6

7.567  
7.555  
7.542  
7.450  
7.433  
7.145

6.620  
6.603

5.910

3.834  
3.821

2.879  
2.865  
2.851  
2.837  
2.824  
2.810  
2.796  
2.500

1.175  
1.161

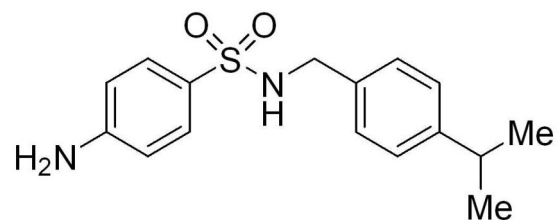

3ae

<sup>1</sup>H NMR (500 MHz, DMSO-d6)

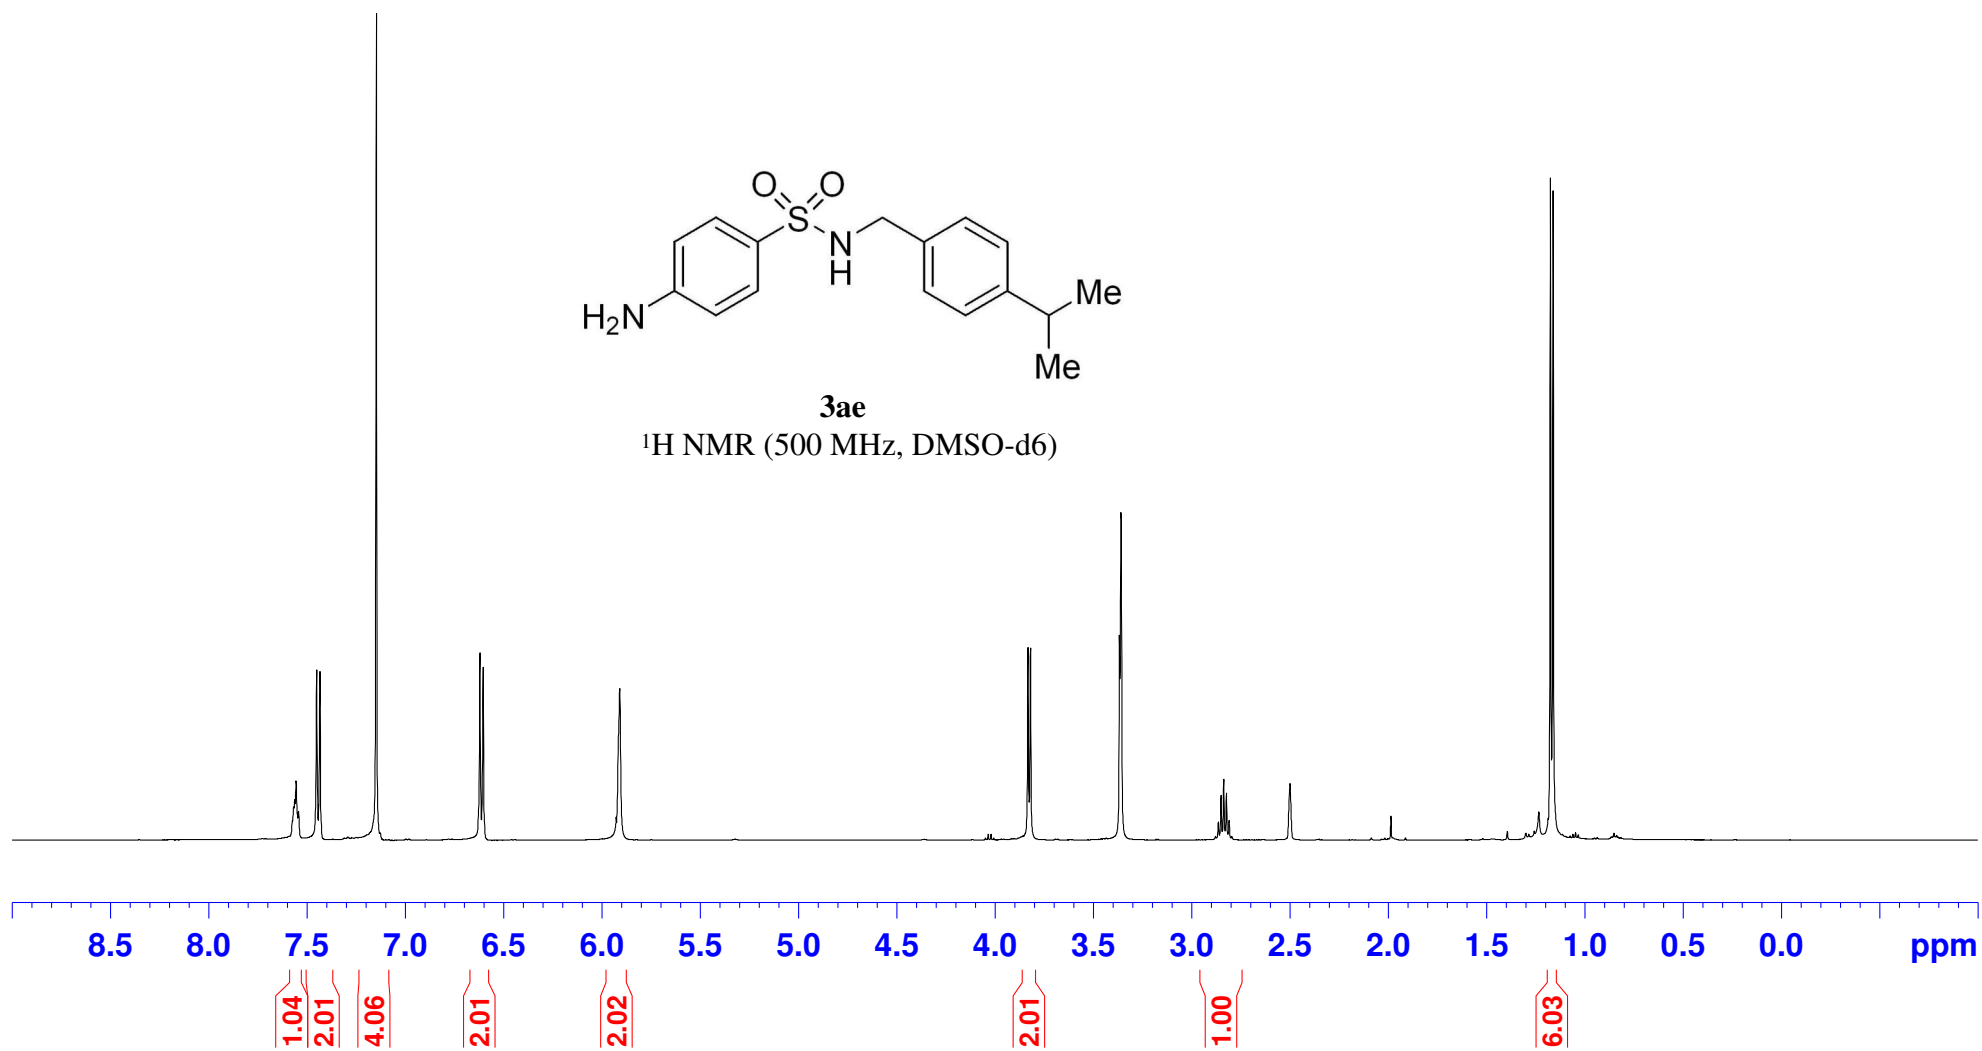

N-(4-isopropylbenzyl)-4-aminobenzenesulfonamide  
C13CPD DMSO-d6

— 152.732  
— 147.520

— 135.622  
— 128.759  
— 127.945  
— 126.365  
— 125.885

— 112.948

46.232  
40.285  
40.119  
39.952  
39.785  
39.618  
39.451  
39.284  
33.408  
24.215

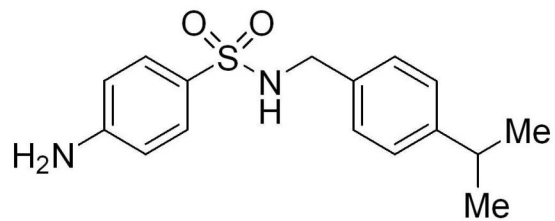

**3ae**

<sup>13</sup>C {<sup>1</sup>H} NMR (125 MHz, DMSO-d6)

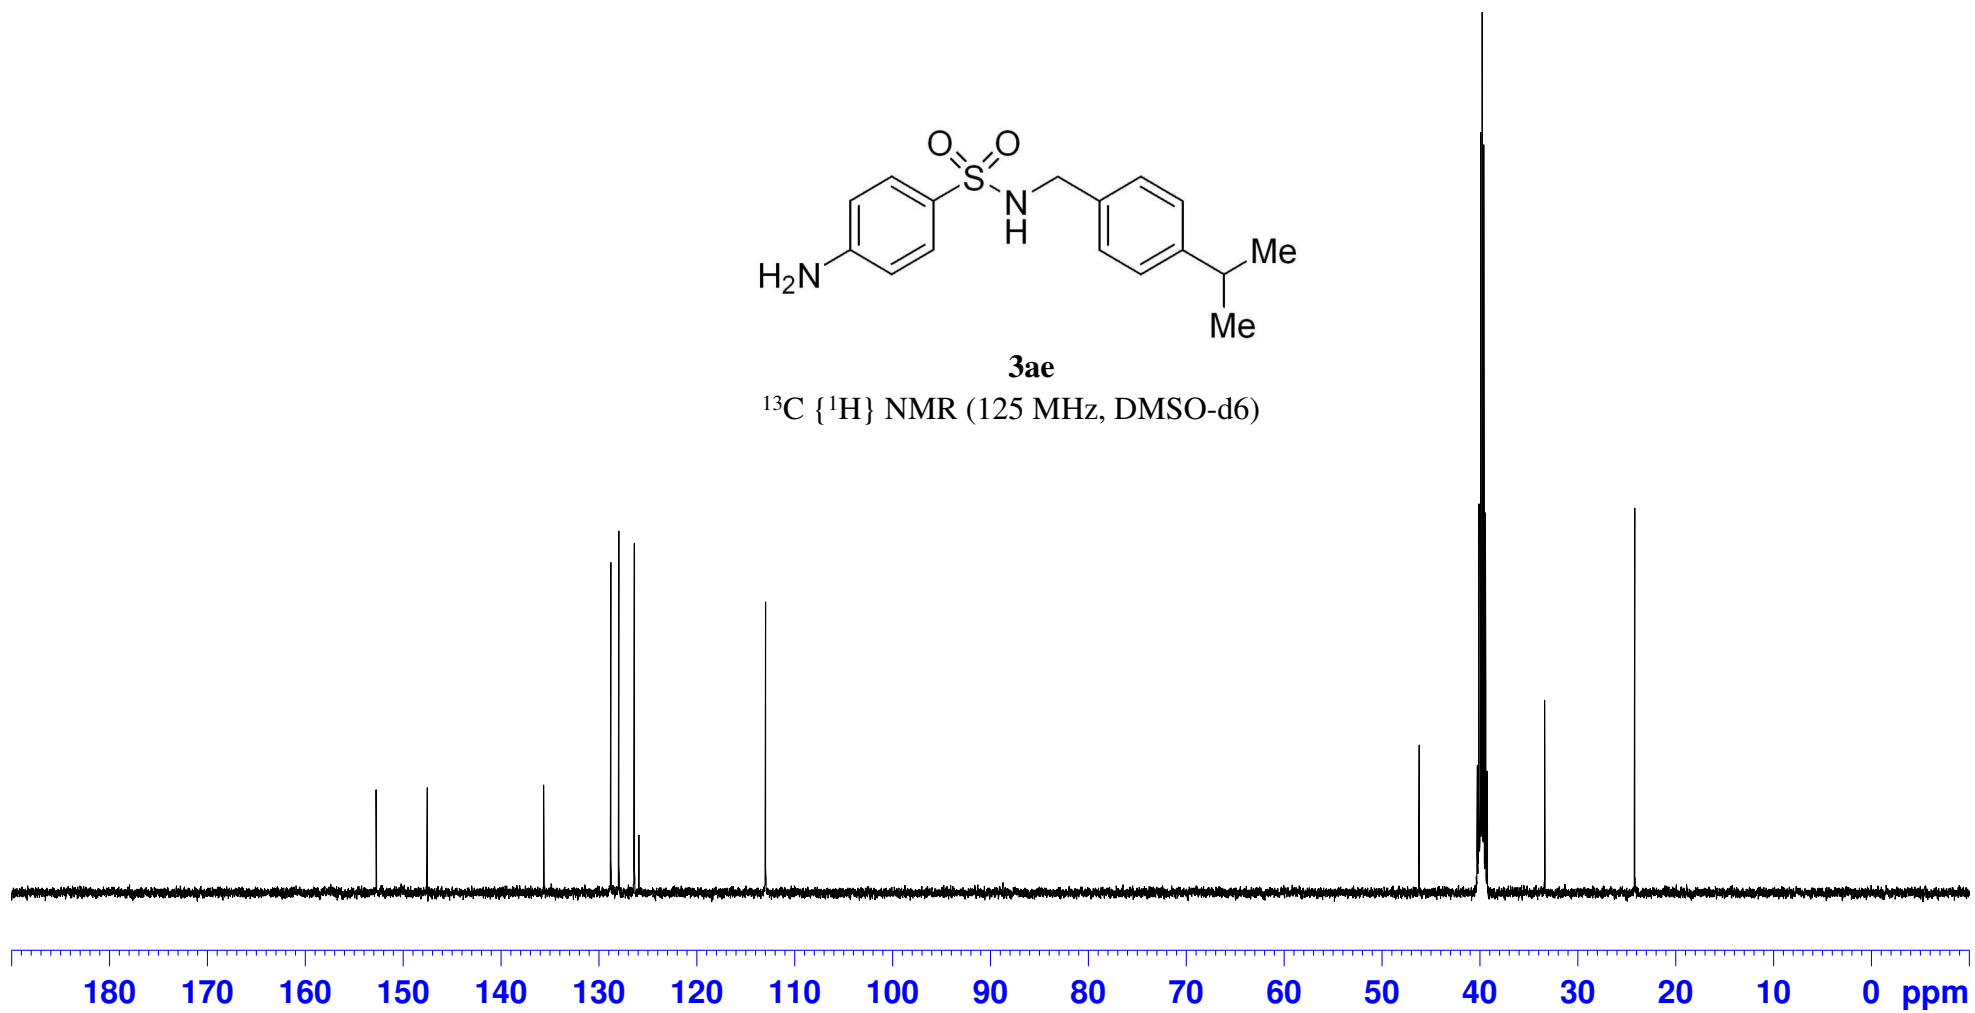

N-(4-bromobenzyl)-4-aminobenzenesulfonamide  
Proton DMSO-d6

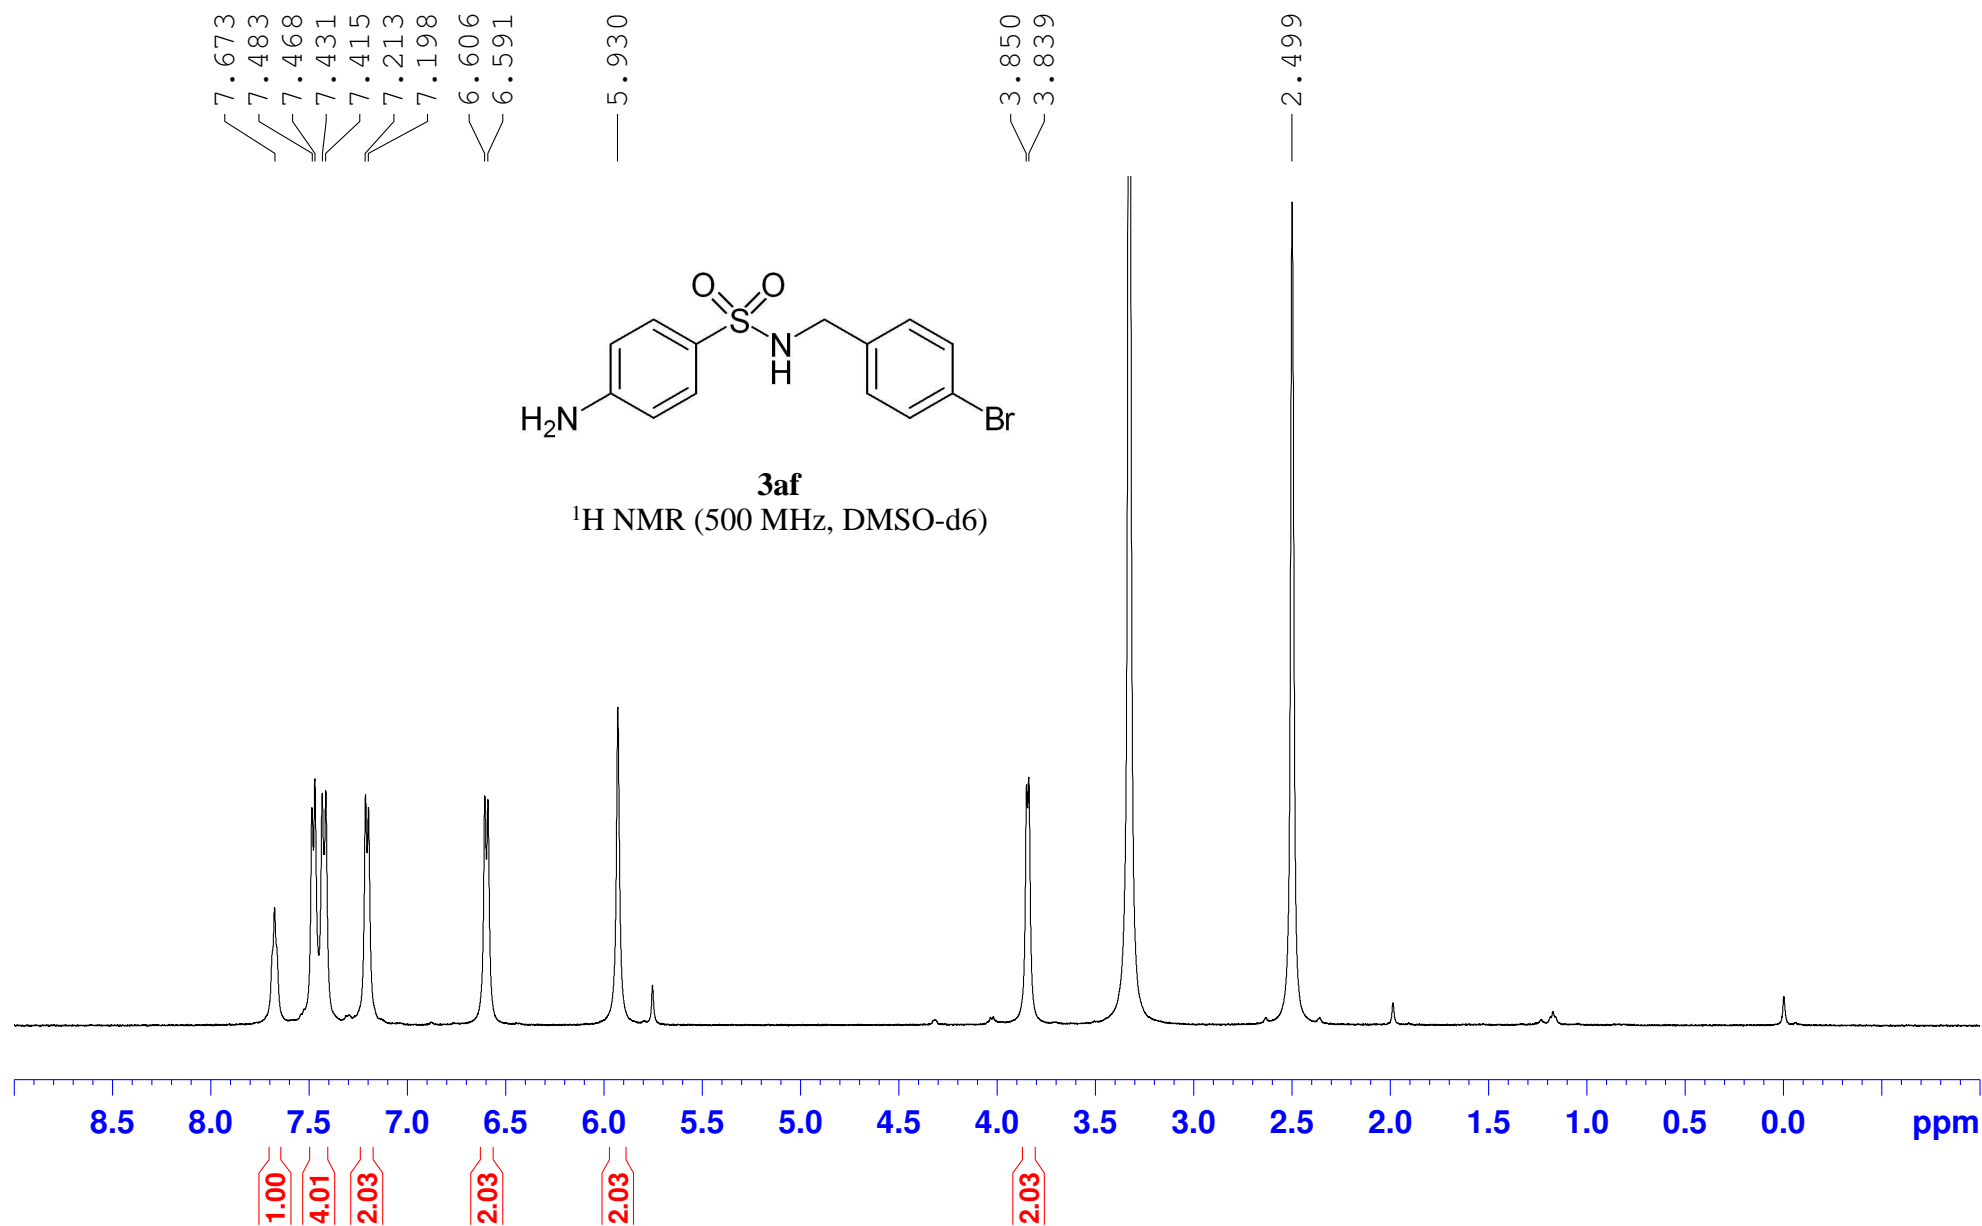

N-(4-bromobenzyl)-4-aminobenzenesulfonamide  
C13CPD DMSO-d6

— 152.814  
— 137.973  
— 131.309  
— 130.030  
— 128.747  
— 125.743  
— 120.321  
— 112.981

45.655  
40.254  
40.086  
39.919  
39.752  
39.585  
39.418  
39.251

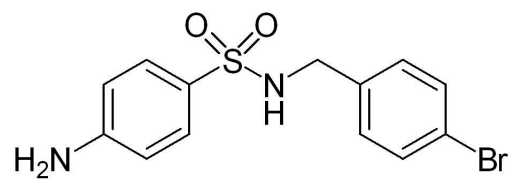

**3af**

$^{13}\text{C}$  { $^1\text{H}$ } NMR (125 MHz, DMSO-d6)

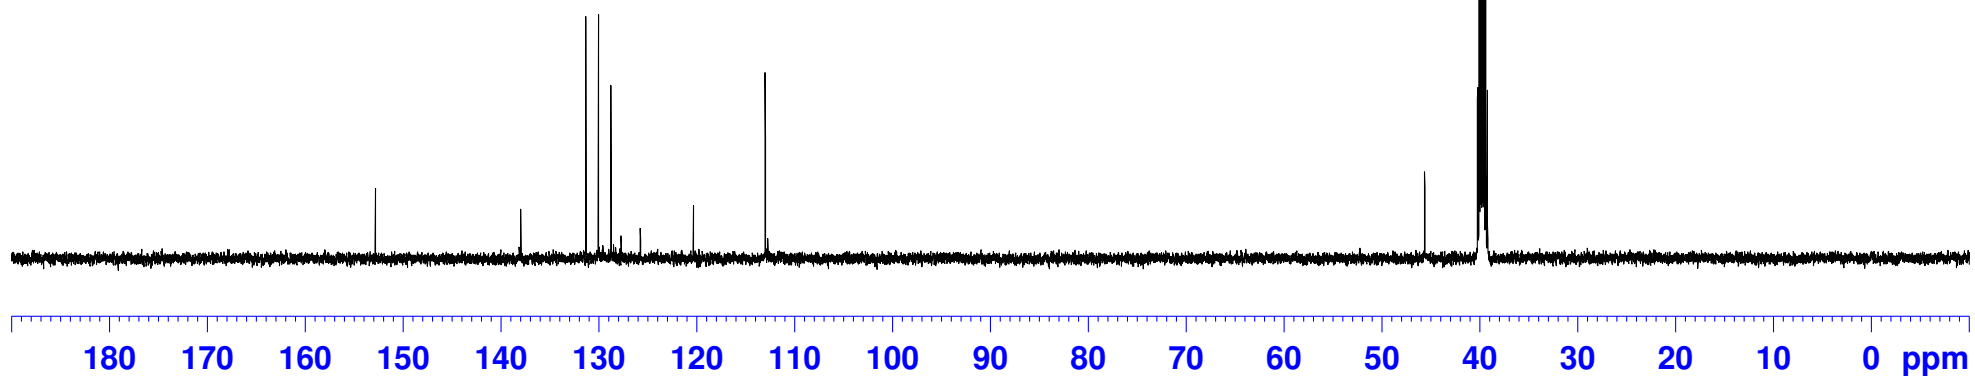

N-(2-chlorobenzyl)-4-aminobenzenesulfonamide  
Proton DMSO-d6

7.773  
7.761  
7.749  
7.540  
7.524  
7.491  
7.476  
7.375  
7.360  
7.309  
7.294  
7.279  
7.266  
7.251  
7.236  
6.690  
6.674  
5.956

4.016  
4.004

2.500

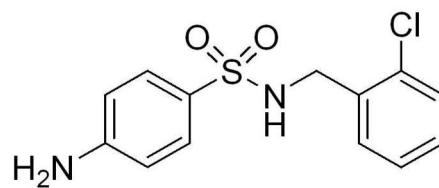

**3ag**

<sup>1</sup>H NMR (500 MHz, DMSO-d6)

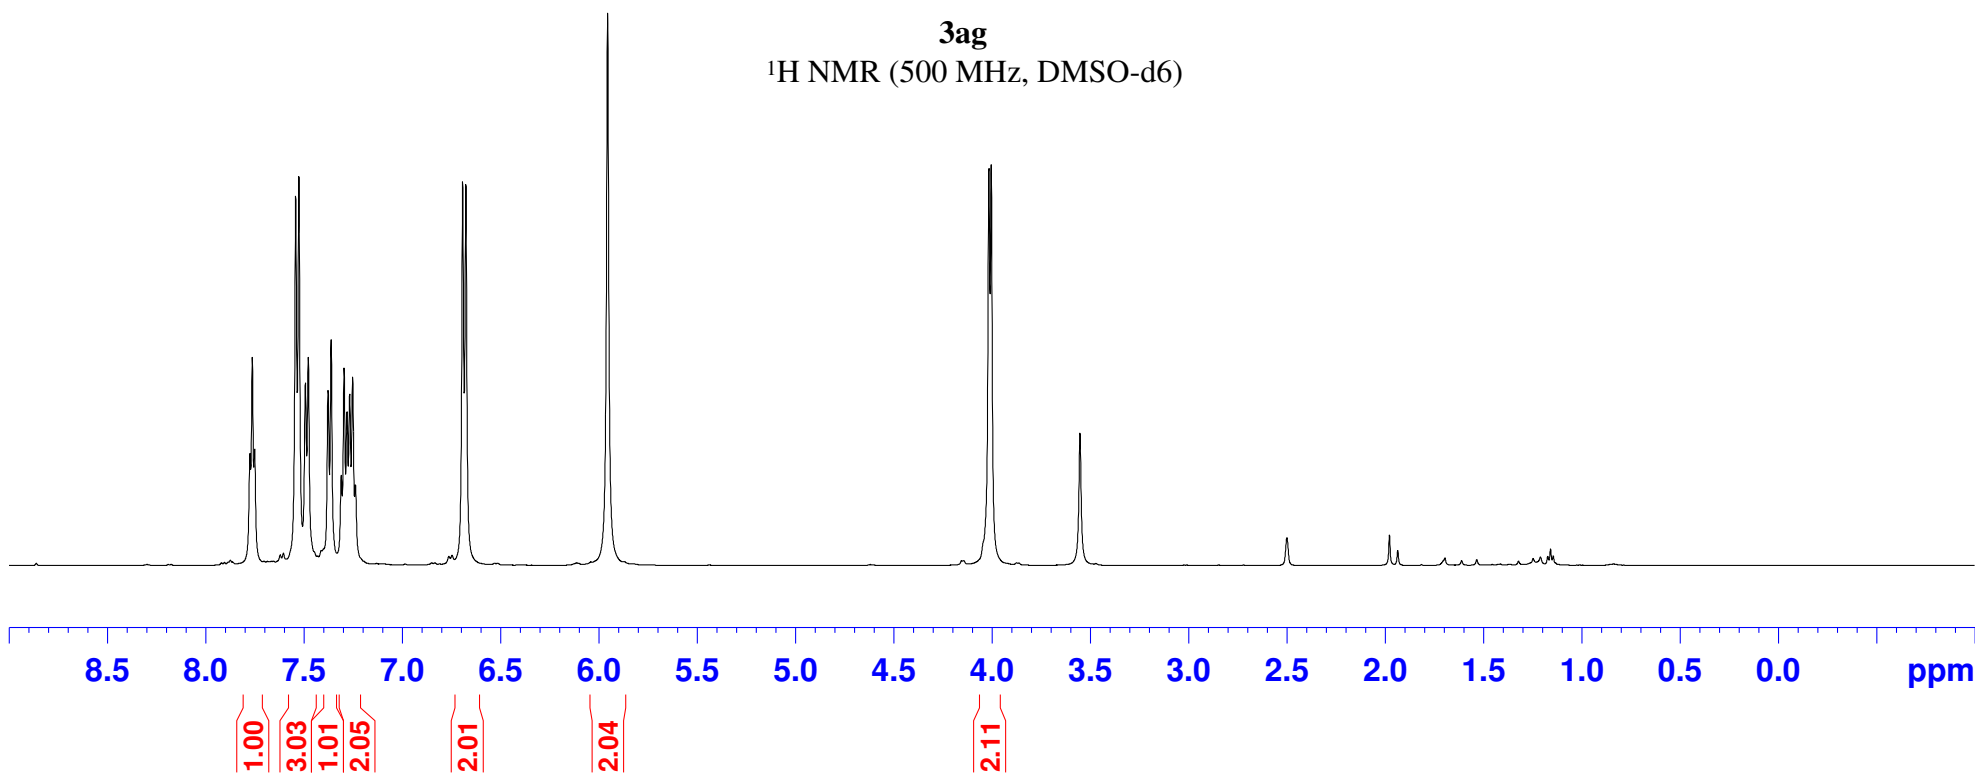

N-(2-chlorobenzyl)-4-aminobenzenesulfonamide  
C13CPD DMSO-d6

— 152.872  
135.575  
132.377  
129.918  
129.283  
129.098  
128.881  
127.328  
125.620  
— 113.101

43.882  
40.226  
40.059  
39.892  
39.725  
39.558  
39.391  
39.225

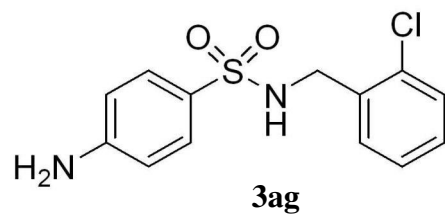

$^{13}\text{C}$  { $^1\text{H}$ } NMR (125 MHz, DMSO-d6)

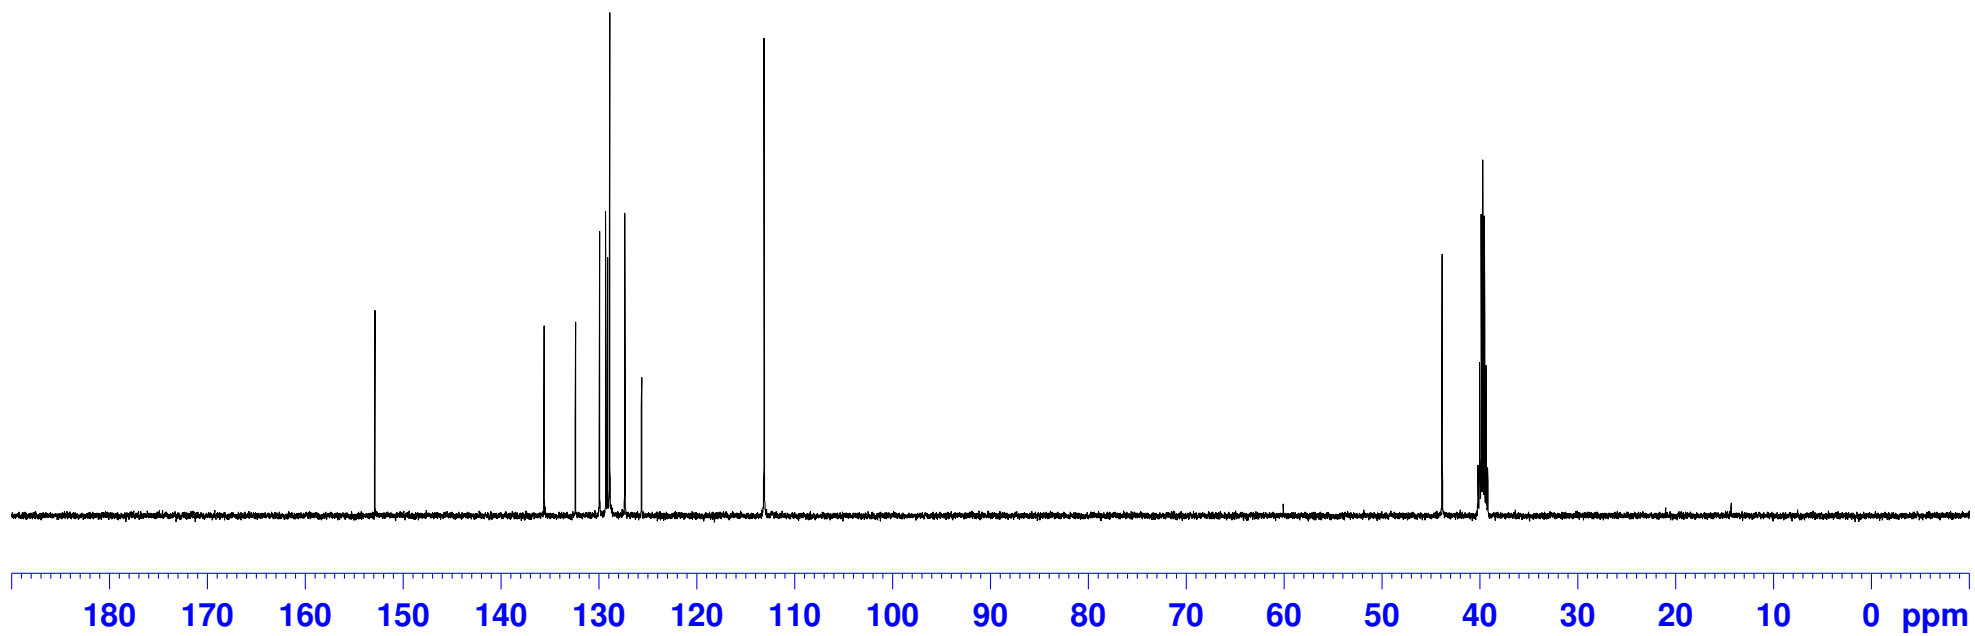

N-(4-chlorobenzyl)-4-aminobenzenesulfonamide  
Proton DMSO-d6

7.695  
7.683  
7.670  
7.436  
7.419  
7.344  
7.327  
7.269  
7.253  
6.614  
6.597

5.925

3.872  
3.859

2.500

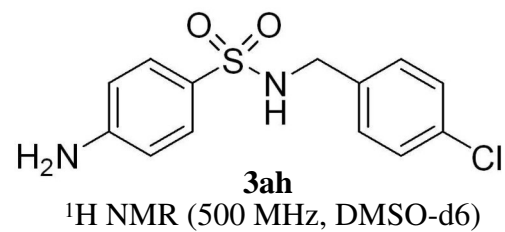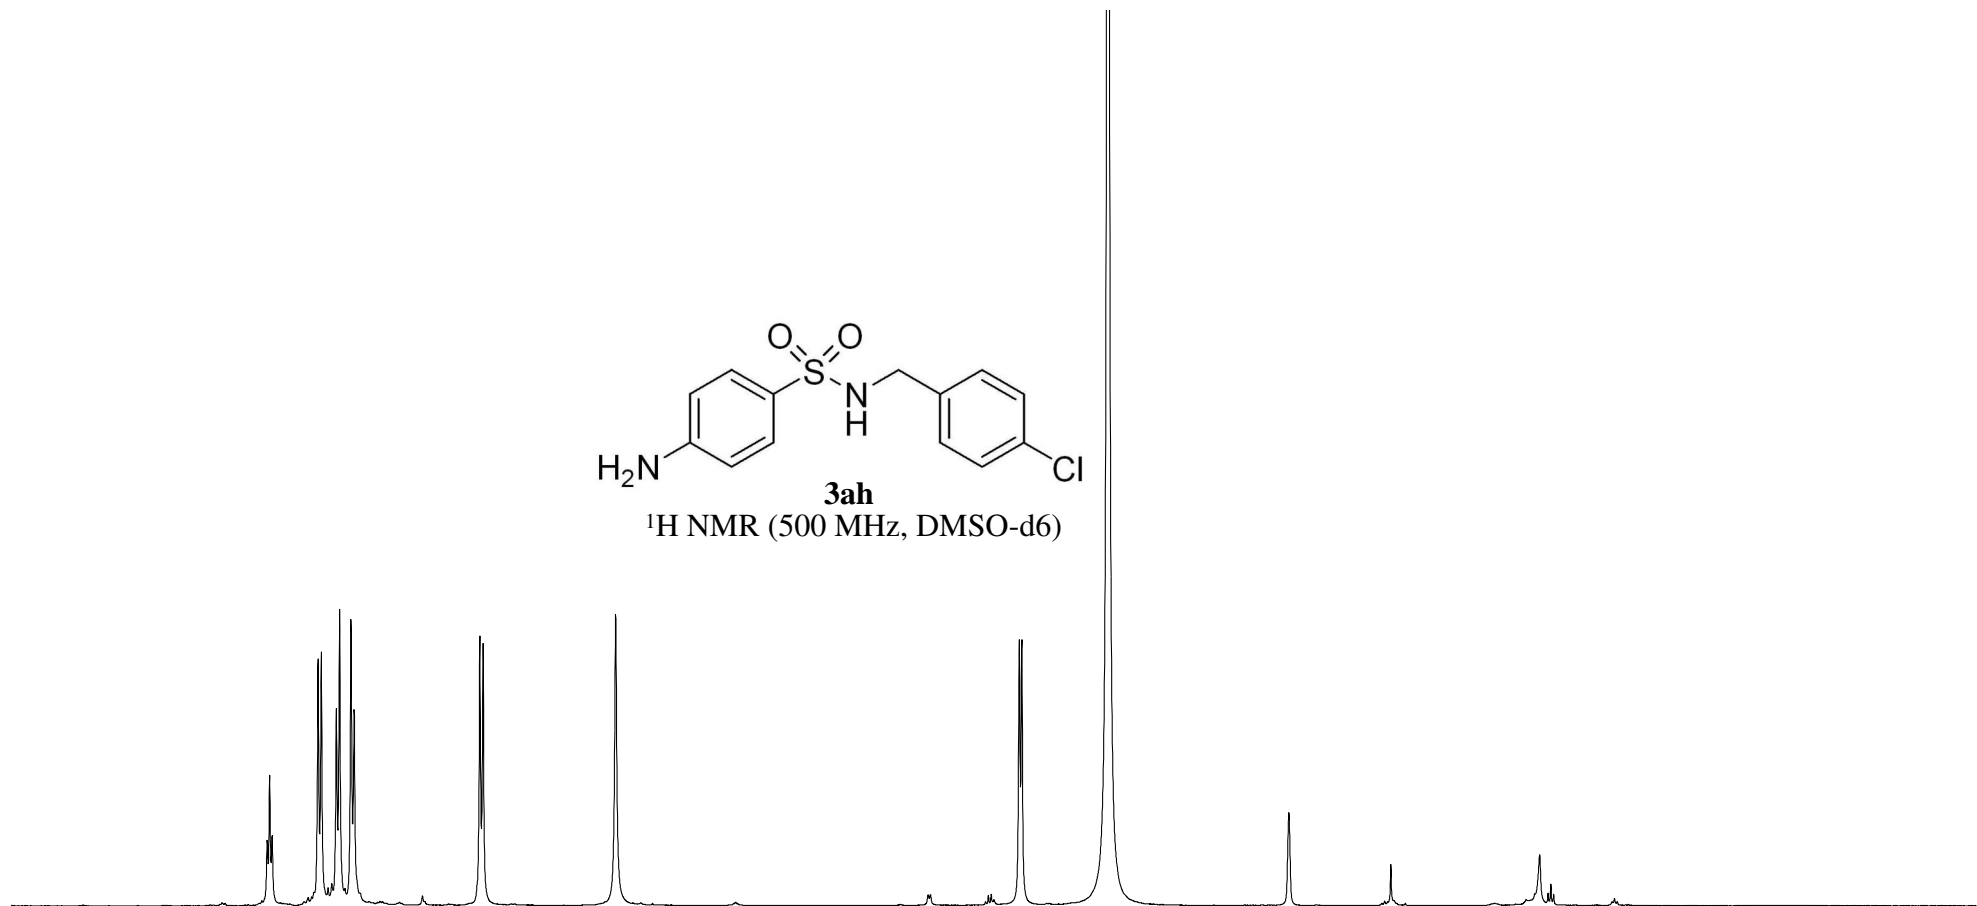

8.5

8.0

7.5

7.0

6.5

6.0

5.5

5.0

4.5

4.0

3.5

3.0

2.5

2.0

1.5

1.0

0.5

0.0

ppm

1.00

2.01

2.00

2.08

2.09

2.01

2.08

N-(4-chlorobenzyl)-4-aminobenzenesulfonamide  
C13CPD DMSO-d6

— 152.807  
— 137.528  
— 131.844  
— 129.662  
— 128.749  
— 128.388  
— 125.781  
— 112.987

45.611  
40.253  
40.087  
39.919  
39.752  
39.585  
39.418  
39.251

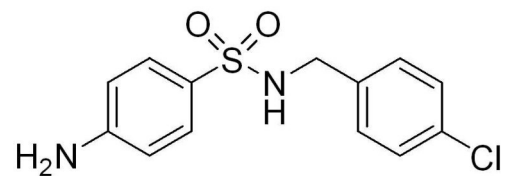

**3ah**

$^{13}\text{C}$  { $^1\text{H}$ } NMR (125 MHz, DMSO-d6)

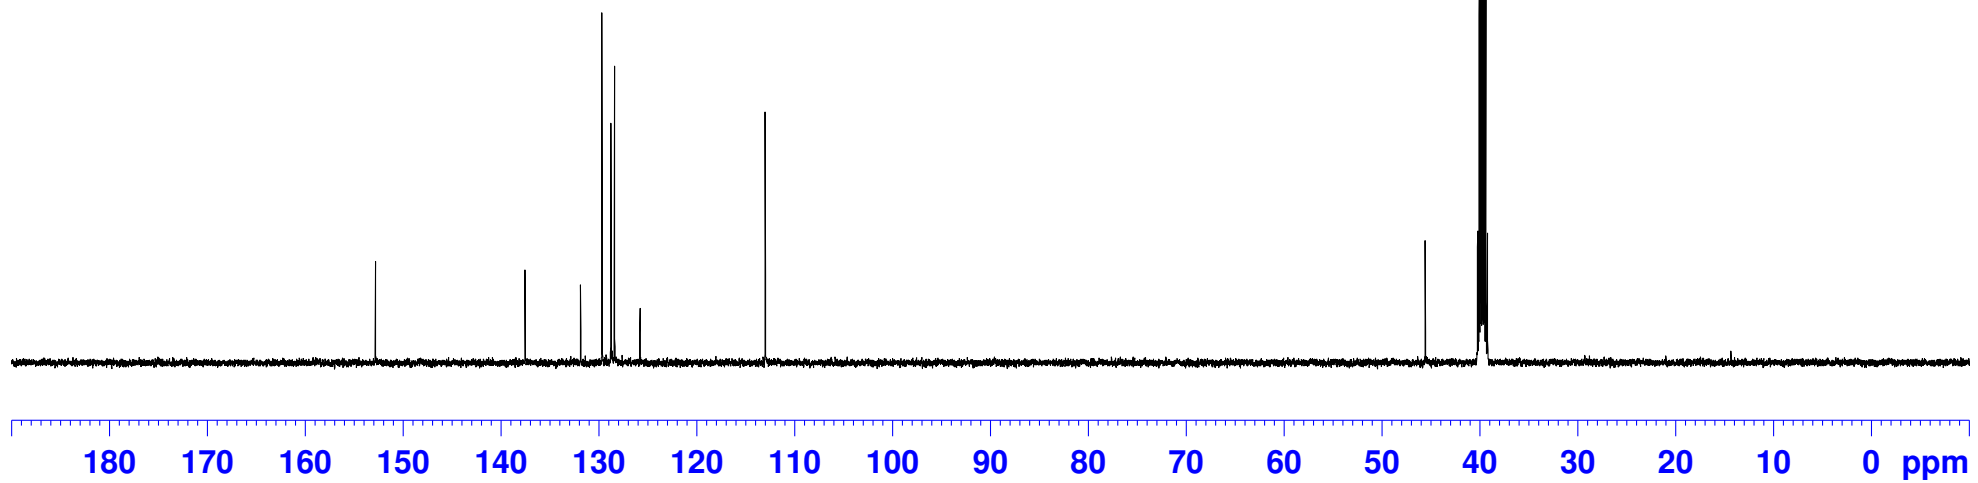



N-(3-fluorophenyl)-4-aminobenzenesulfonamide  
Proton DMSO-d6

7.734  
7.722  
7.709  
7.437  
7.420  
7.341  
7.326  
7.312  
7.309  
7.296  
7.094  
7.079  
7.057  
7.038  
7.025  
6.607  
6.590  
5.937

3.917  
3.904

2.500

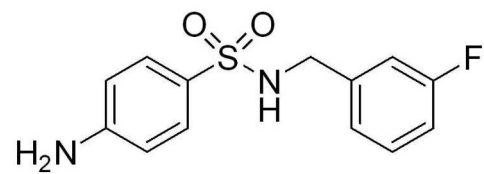

**3ai**  
<sup>1</sup>H NMR (500 MHz, DMSO-d6)

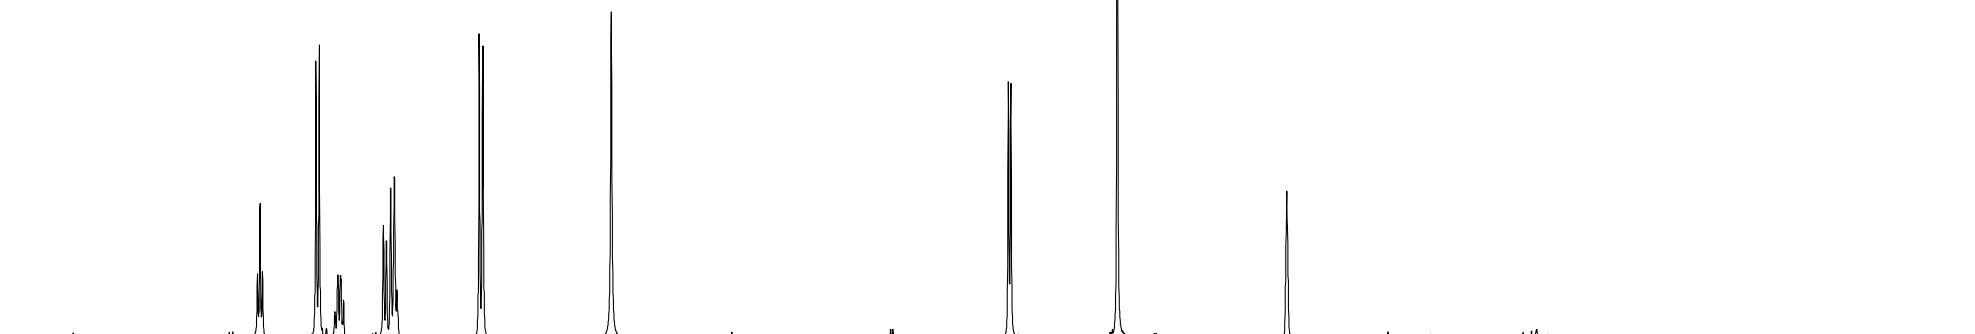

8.5 8.0 7.5 7.0 6.5 6.0 5.5 5.0 4.5 4.0 3.5 3.0 2.5 2.0 1.5 1.0 0.5 0.0 ppm

1.03  
2.05  
1.03  
3.00  
2.06  
2.05  
2.05

N-(3-fluorophenyl)-4-aminobenzenesulfonamide  
C13CPD DMSO-d6

163.324  
161.389  
152.827  
141.552  
141.495  
130.406  
130.341  
128.745  
125.796  
123.752  
123.732  
114.492  
114.319  
114.068  
113.902  
112.953

45.727  
40.301  
40.133  
39.967  
39.800  
39.633  
39.466  
39.299

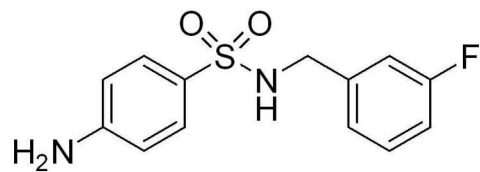

**3ai**

$^{13}\text{C}$  { $^1\text{H}$ } NMR (125 MHz, DMSO-d6)

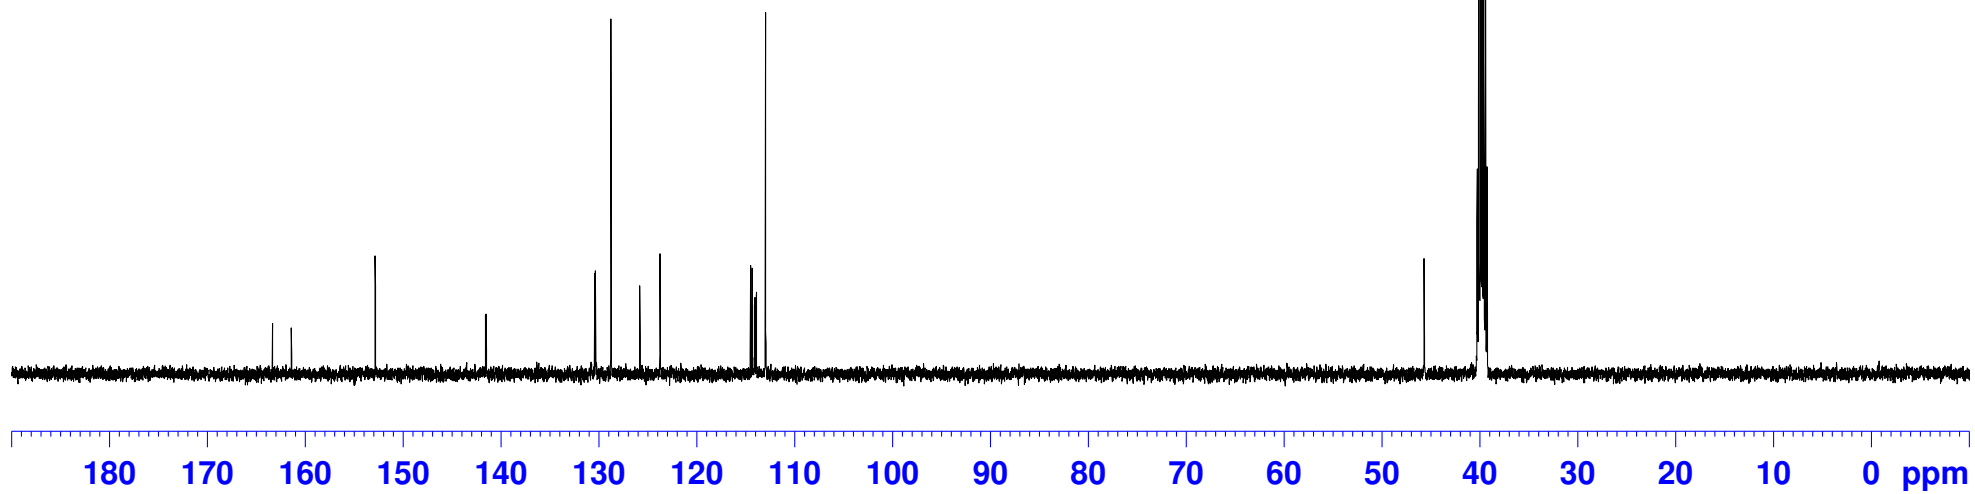

N-(4-(trifluoromethoxy)benzyl)-4-aminobenzenesulfonamide  
Proton DMSO-d6

7.732  
7.719  
7.706  
7.444  
7.426  
7.383  
7.365  
7.284  
7.268  
6.615  
6.598

5.939

3.920  
3.907

2.500

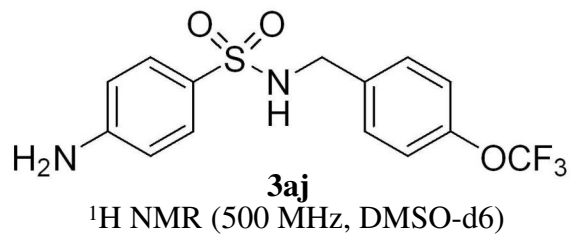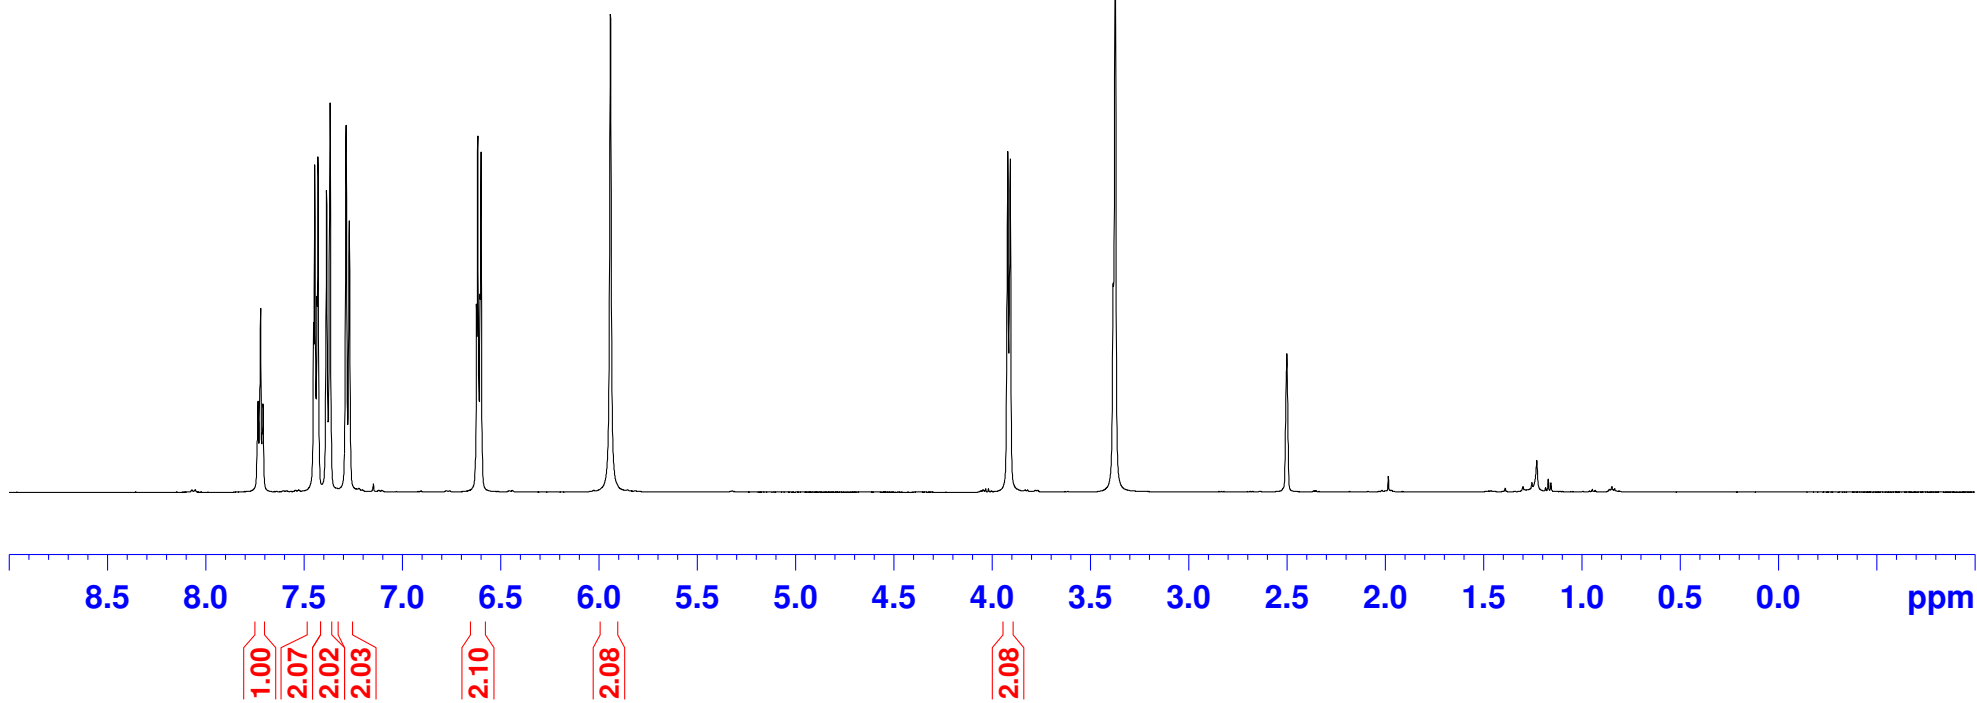

N-(4-(trifluoromethoxy)benzyl)-4-aminobenzenesulfonamide  
C13CPD DMSO-d6

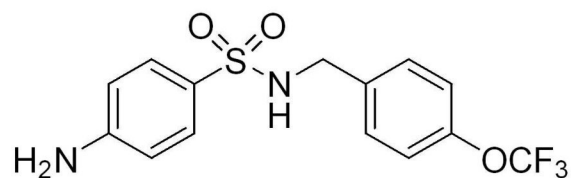

**3aj**

$^{13}\text{C}$  { $^1\text{H}$ } NMR (125 MHz, DMSO-d6)

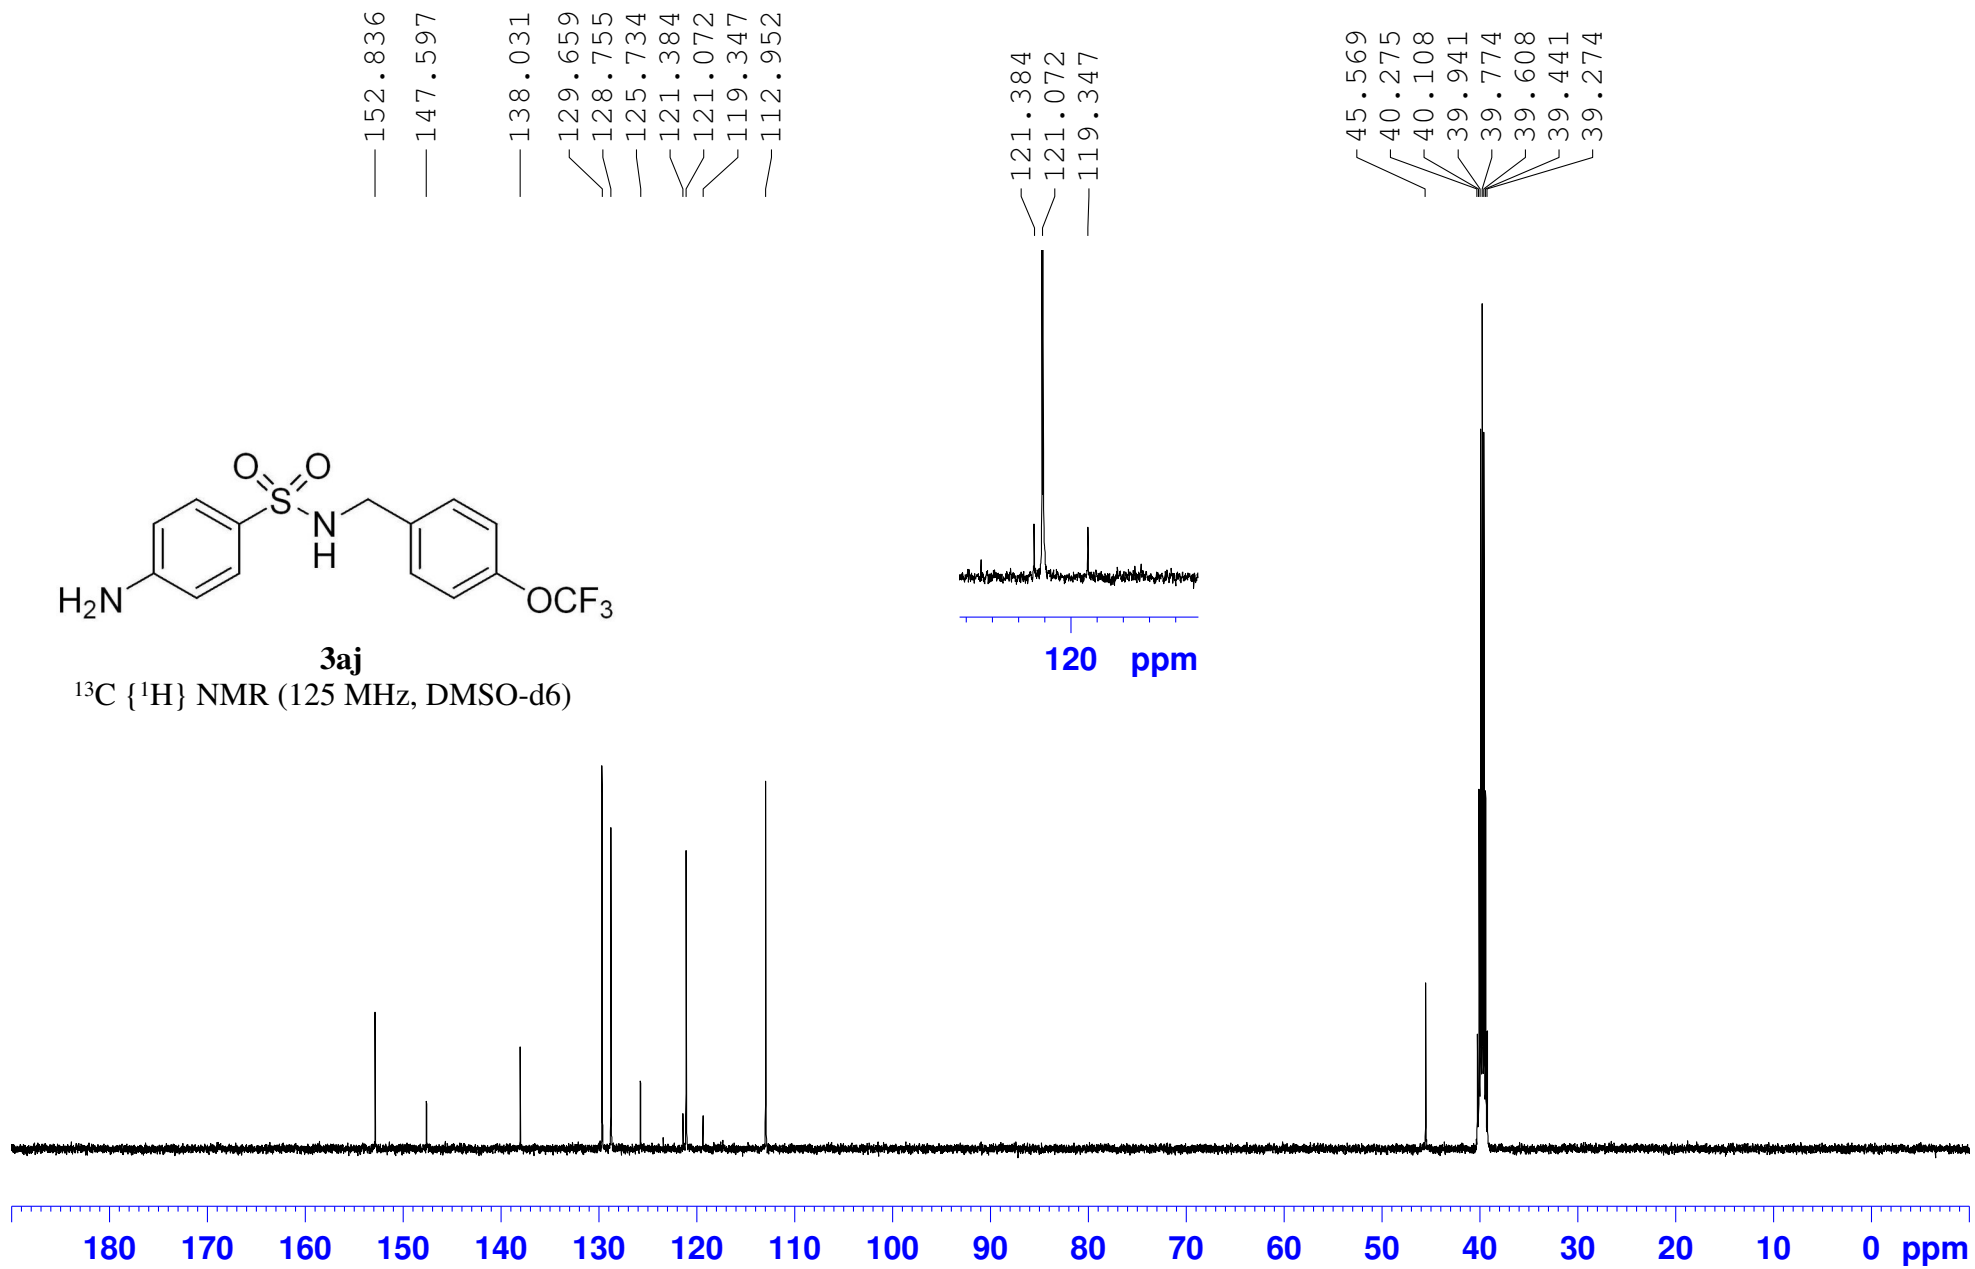

N-(3-(trifluoromethyl)benzyl)-4-aminobenzenesulfonamide  
Proton DMSO-d6

7.816  
7.804  
7.791  
7.595  
7.580  
7.563  
7.544  
7.524  
7.509  
7.445  
7.429  
6.612  
6.595

5.944

4.017  
4.005

2.499

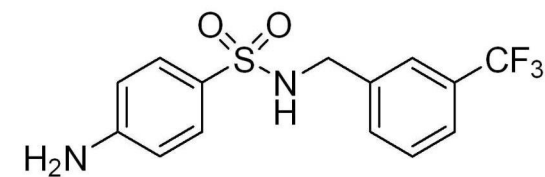

**3ak**  
<sup>1</sup>H NMR (500 MHz, DMSO-d6)

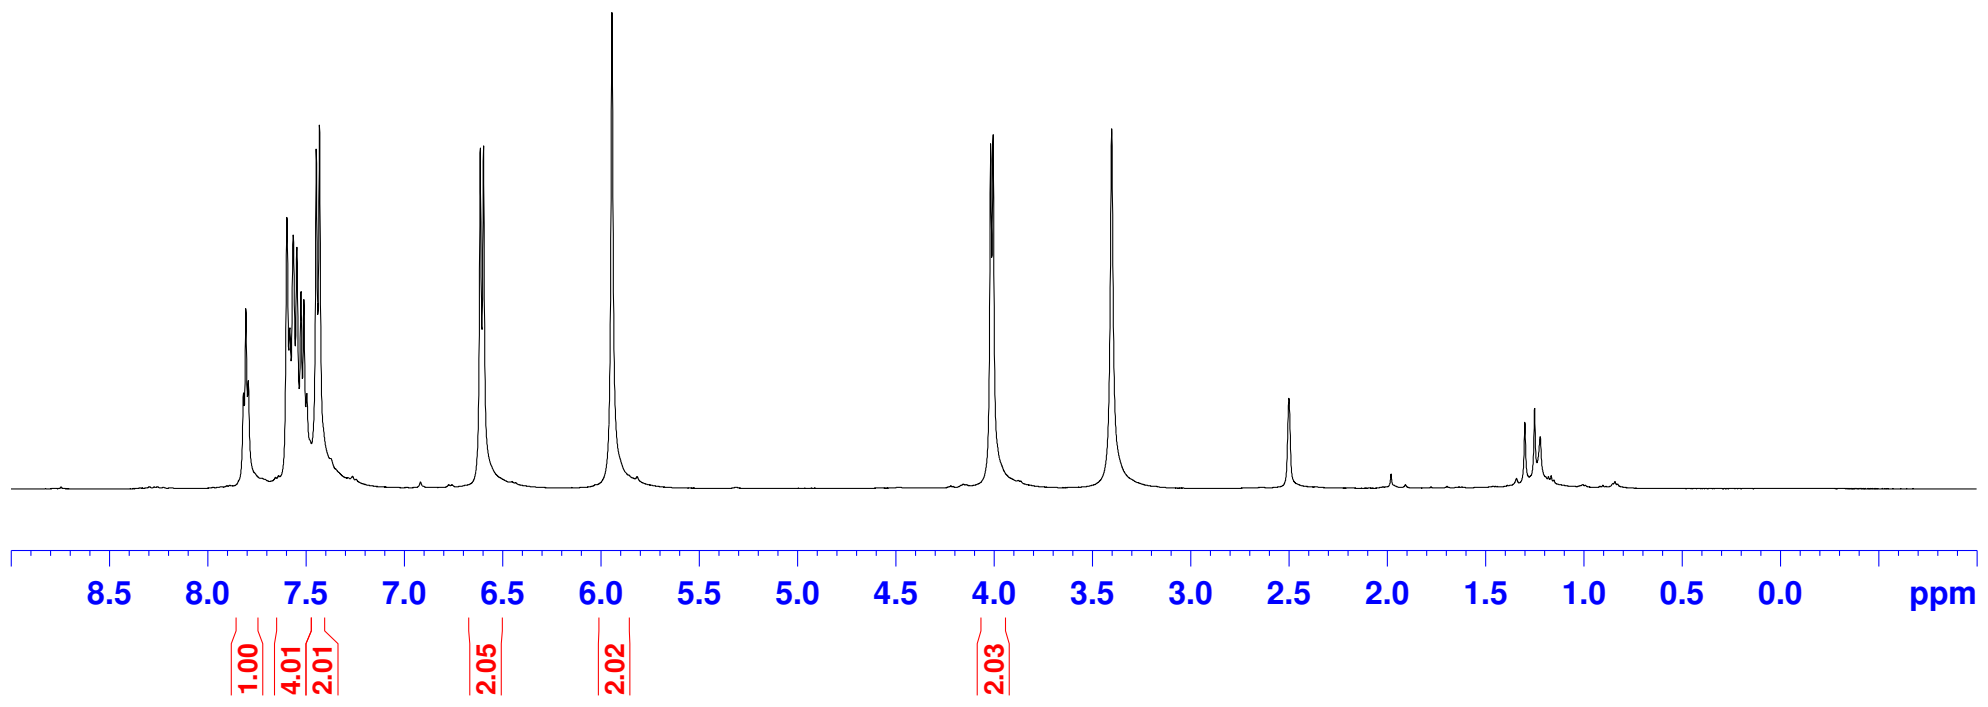

N-(3-(trifluoromethyl)benzyl)-4-aminobenzenesulfonamide  
C13CPD DMSO-d6

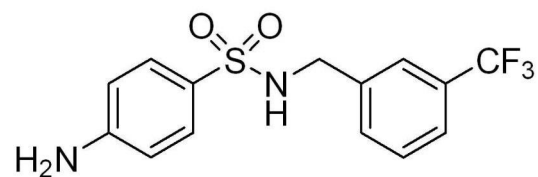

$^{13}\text{C}$  { $^1\text{H}$ } NMR (125 MHz, DMSO-d6)

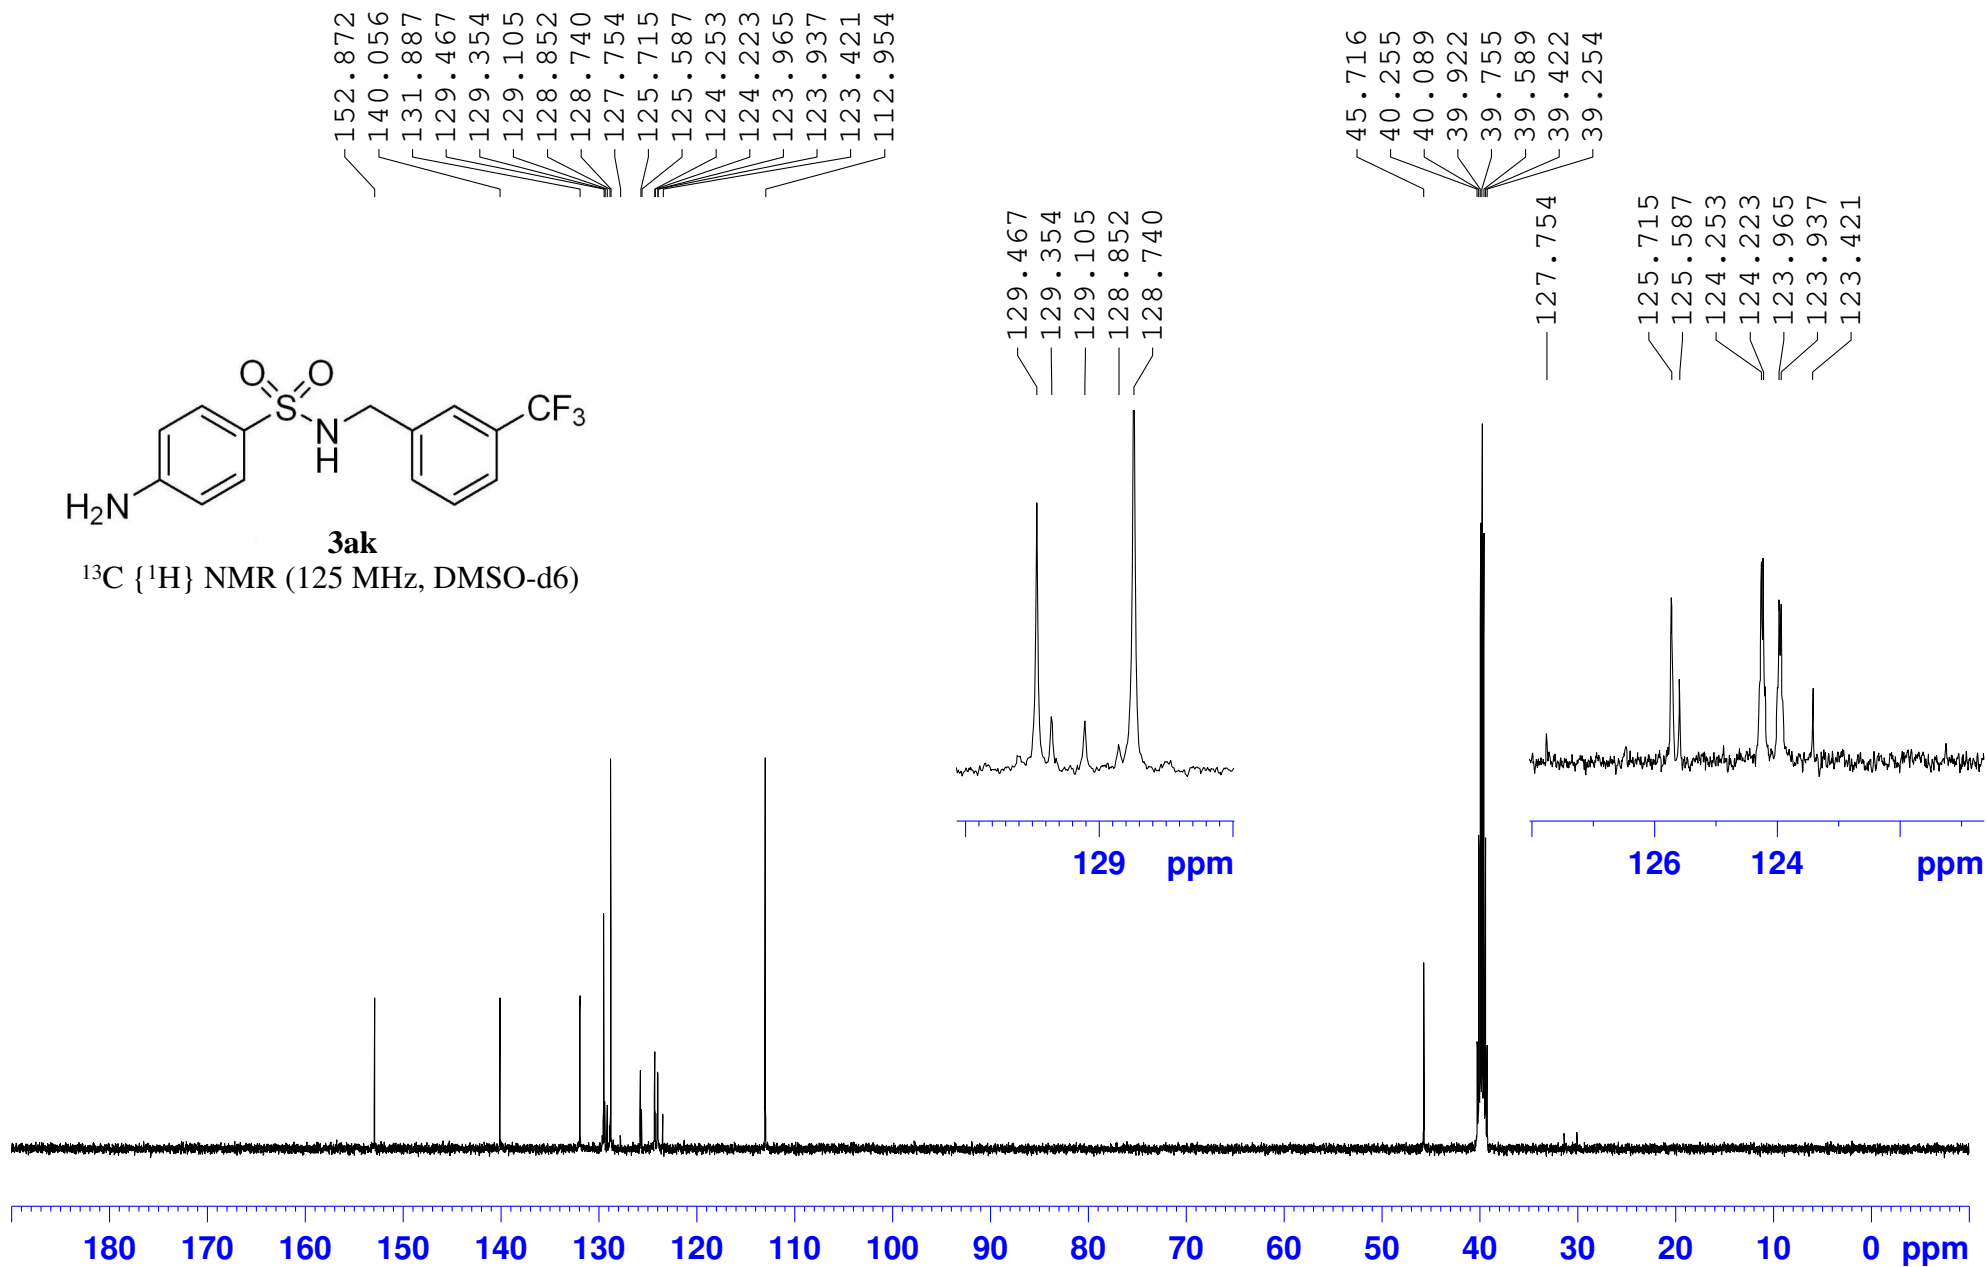

N-(4-(trifluoromethyl)benzyl)-4-aminobenzenesulfonamide  
Proton DMSO-d6

7.786  
7.773  
7.760  
7.656  
7.640  
7.486  
7.470  
7.438  
7.420  
6.606  
6.589

5.936

3.984  
3.971

2.500

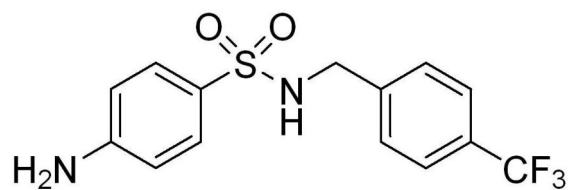

**3al**

<sup>1</sup>H NMR (500 MHz, DMSO-d6)

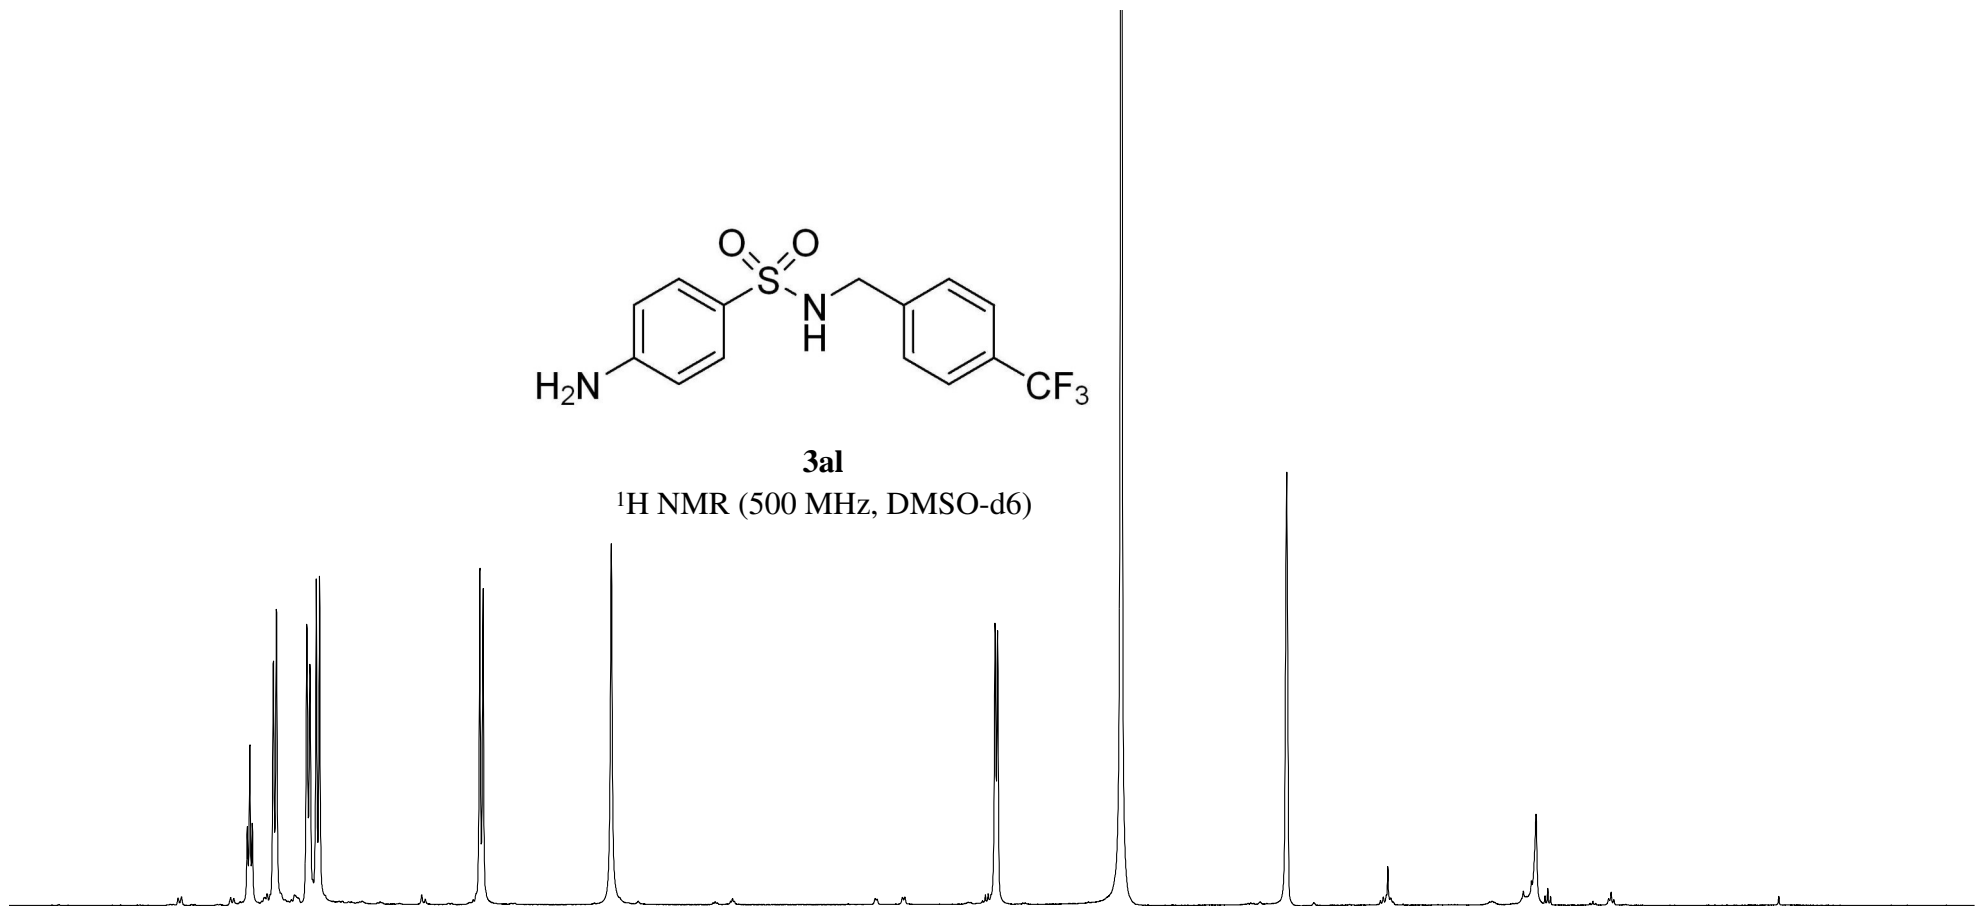

8.5 8.0 7.5 7.0 6.5 6.0 5.5 5.0 4.5 4.0 3.5 3.0 2.5 2.0 1.5 1.0 0.5 0.0 ppm

1.00  
2.00  
2.02  
2.05

2.07

2.03

2.09

N-(4-(trifluoromethyl)benzyl)-4-aminobenzenesulfonamide  
C13CPD DMSO-d6

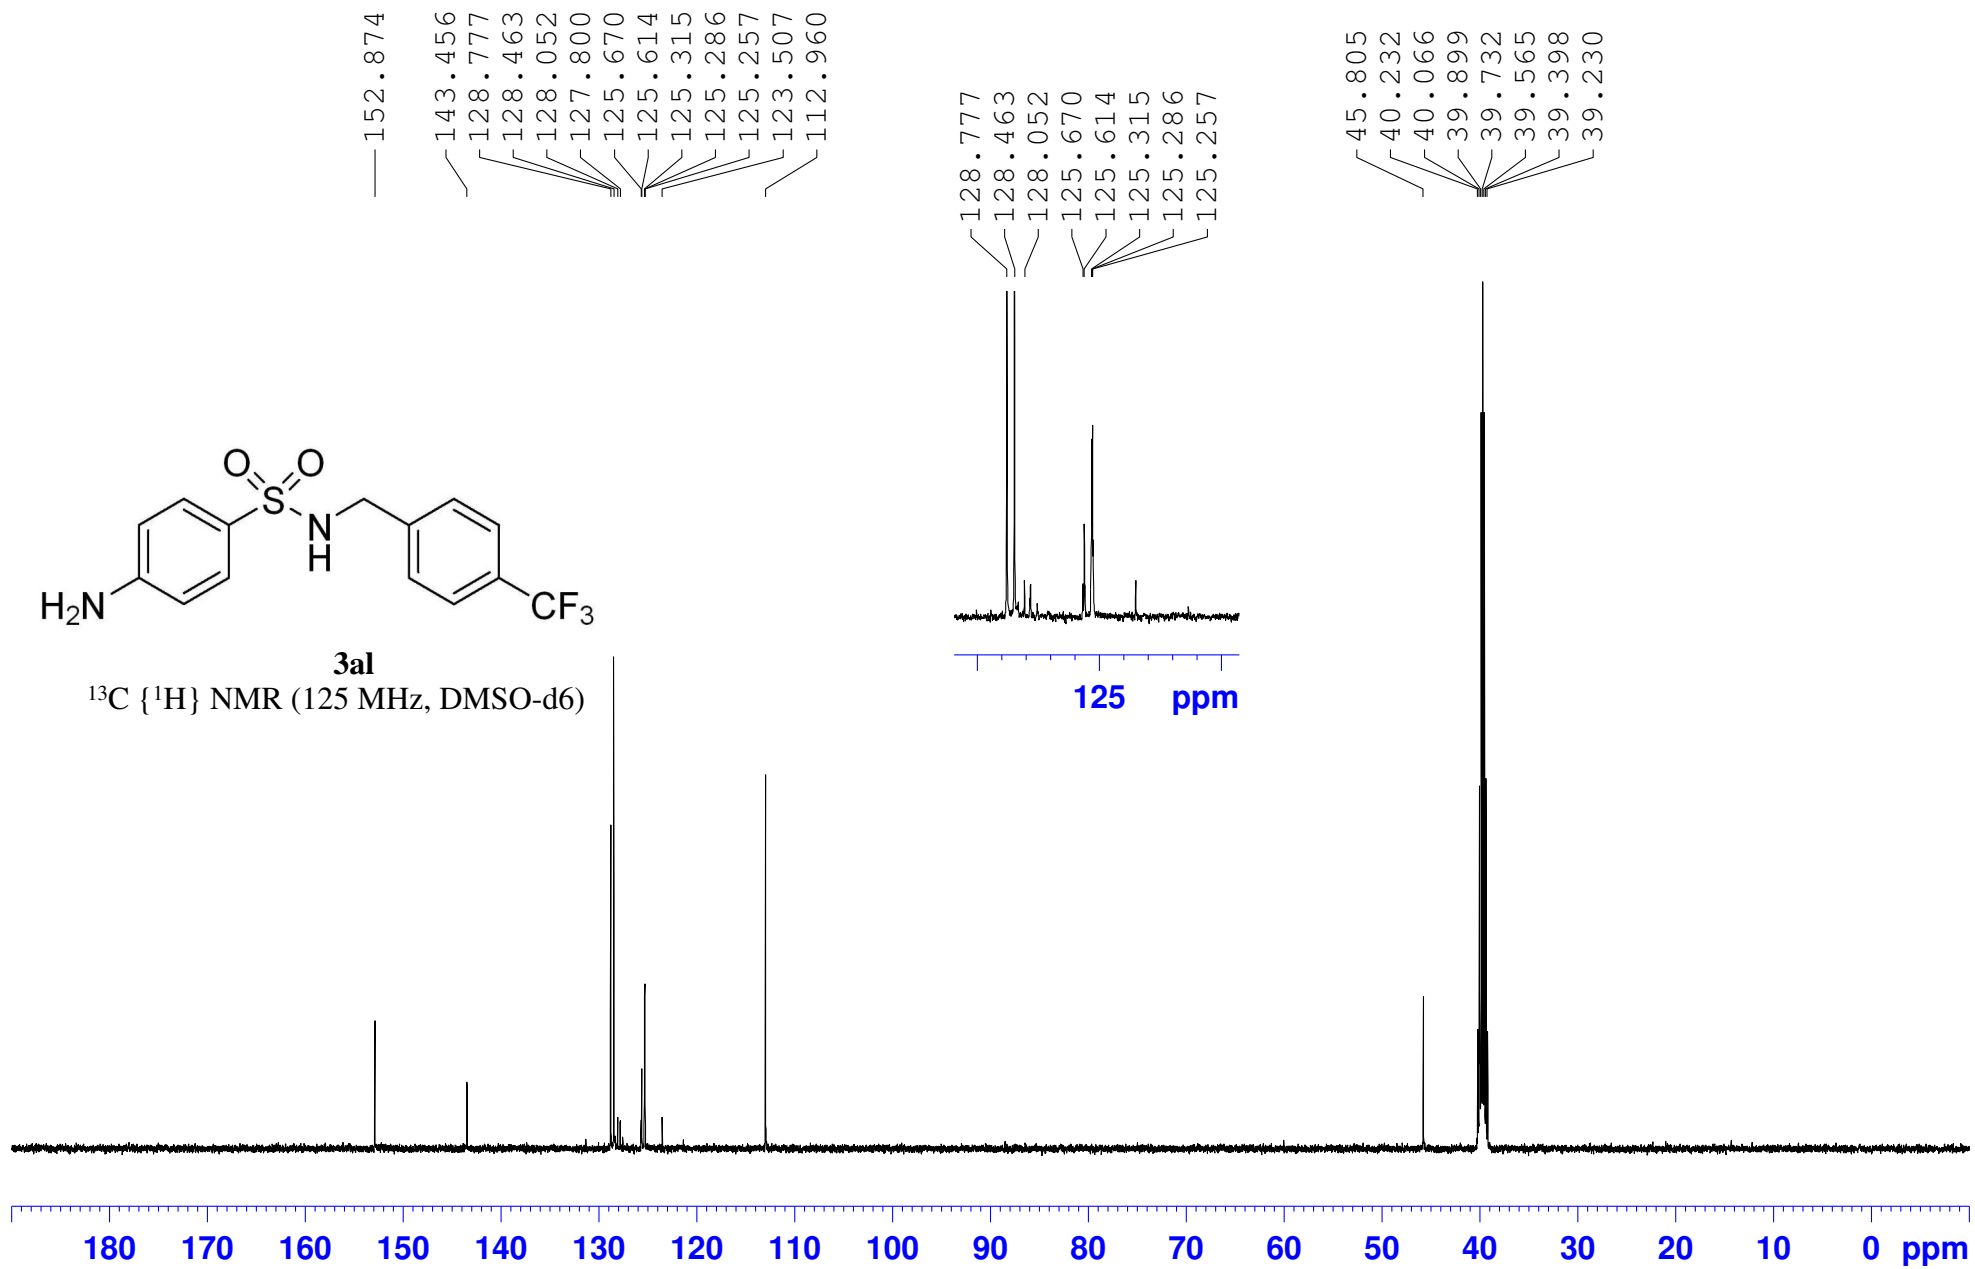



4-amino-N-(thiophen-2-ylmethyl)benzenesulfonamide  
Proton DMSO-d6

7.758  
7.746  
7.733  
7.446  
7.429  
7.391  
7.384  
7.382  
6.921  
6.914  
6.904  
6.618  
6.600  
— 5.934

4.061  
4.048

— 2.500

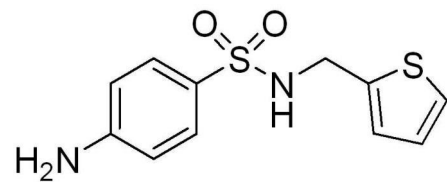

**3am**

<sup>1</sup>H NMR (500 MHz, DMSO-d6)

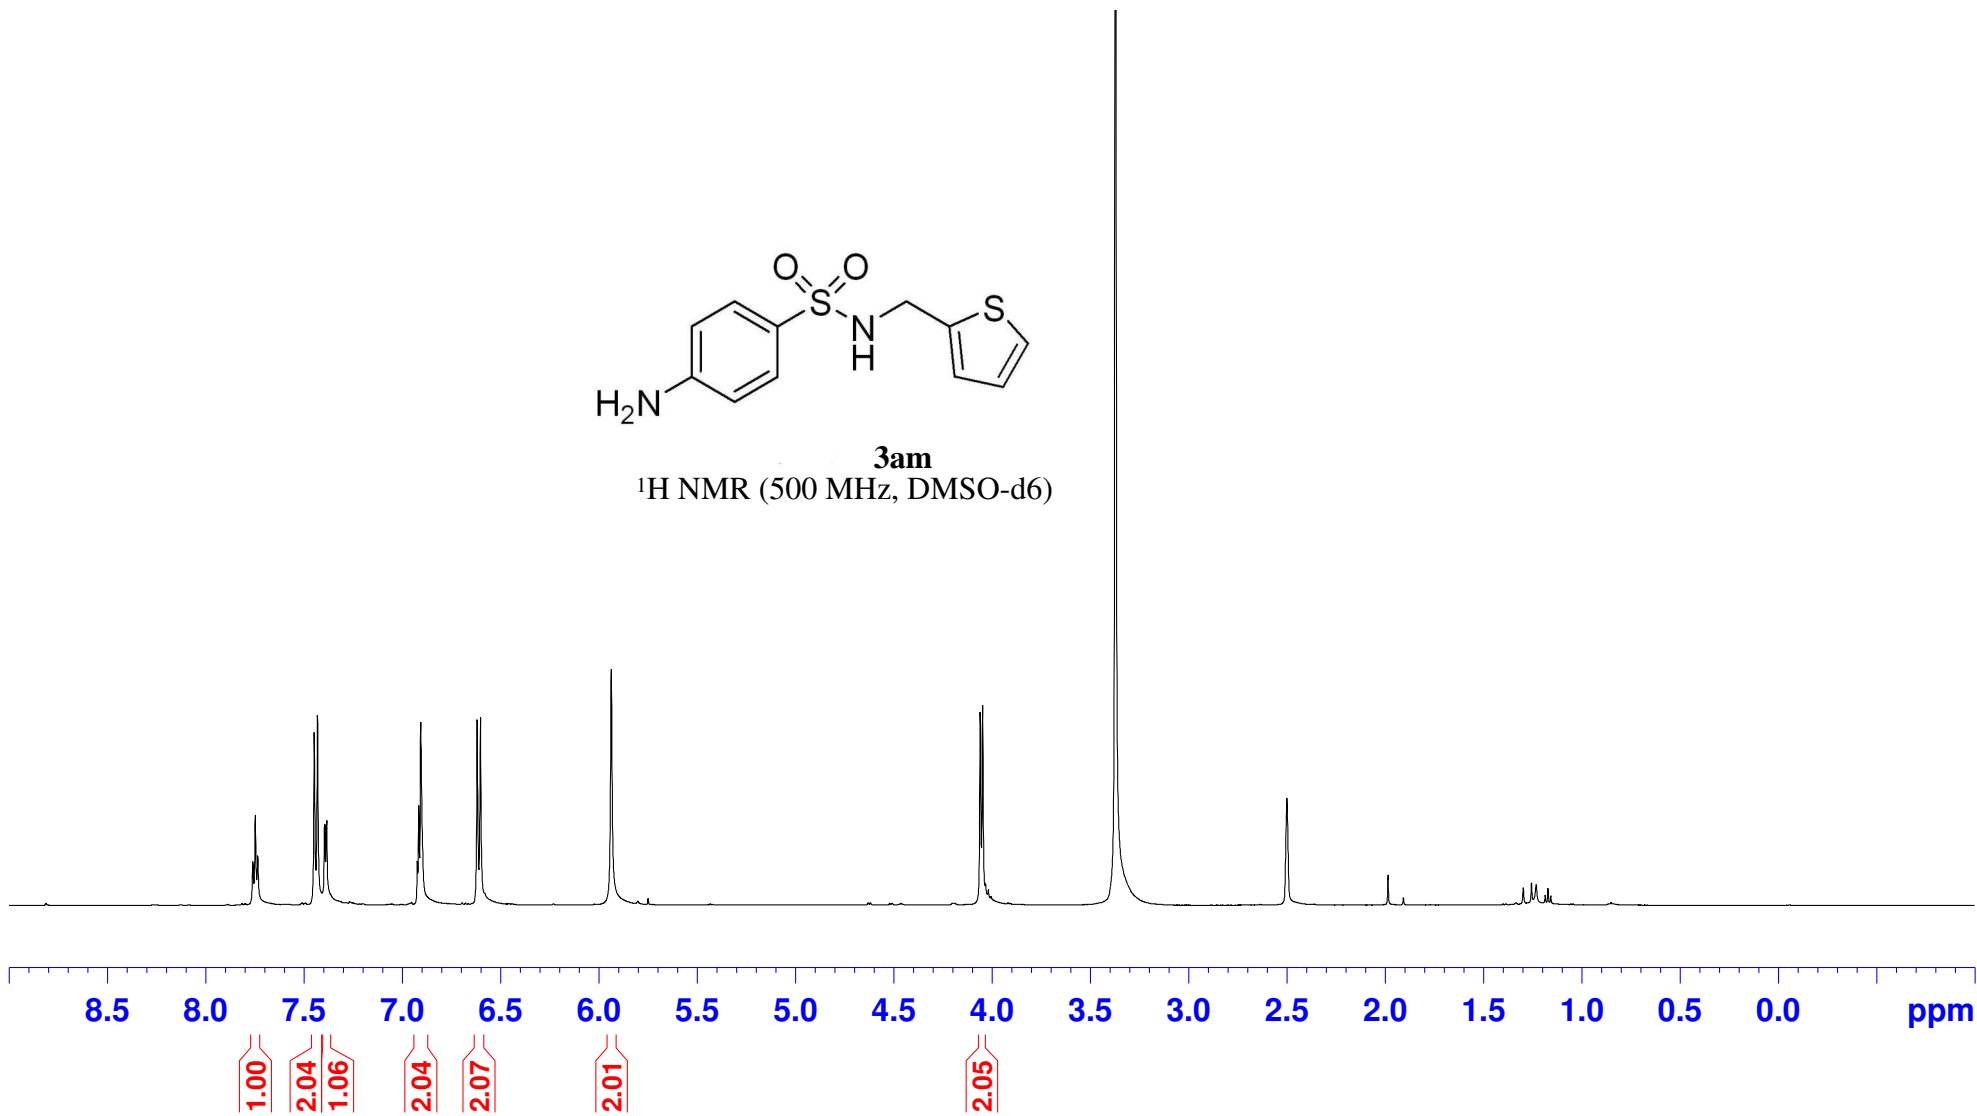

4-amino-N-(thiophen-2-ylmethyl)benzenesulfonamide  
C13CPD DMSO

— 152.850  
— 141.444  
— 128.812  
— 126.952  
— 125.950  
— 125.707  
— 125.618  
— 112.968

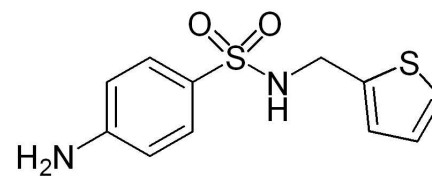

**3am**

$^{13}\text{C} \{^1\text{H}\}$  NMR (125 MHz, DMSO-d<sub>6</sub>)

41.676  
40.275  
40.108  
39.941  
39.774  
39.607  
39.439  
39.272

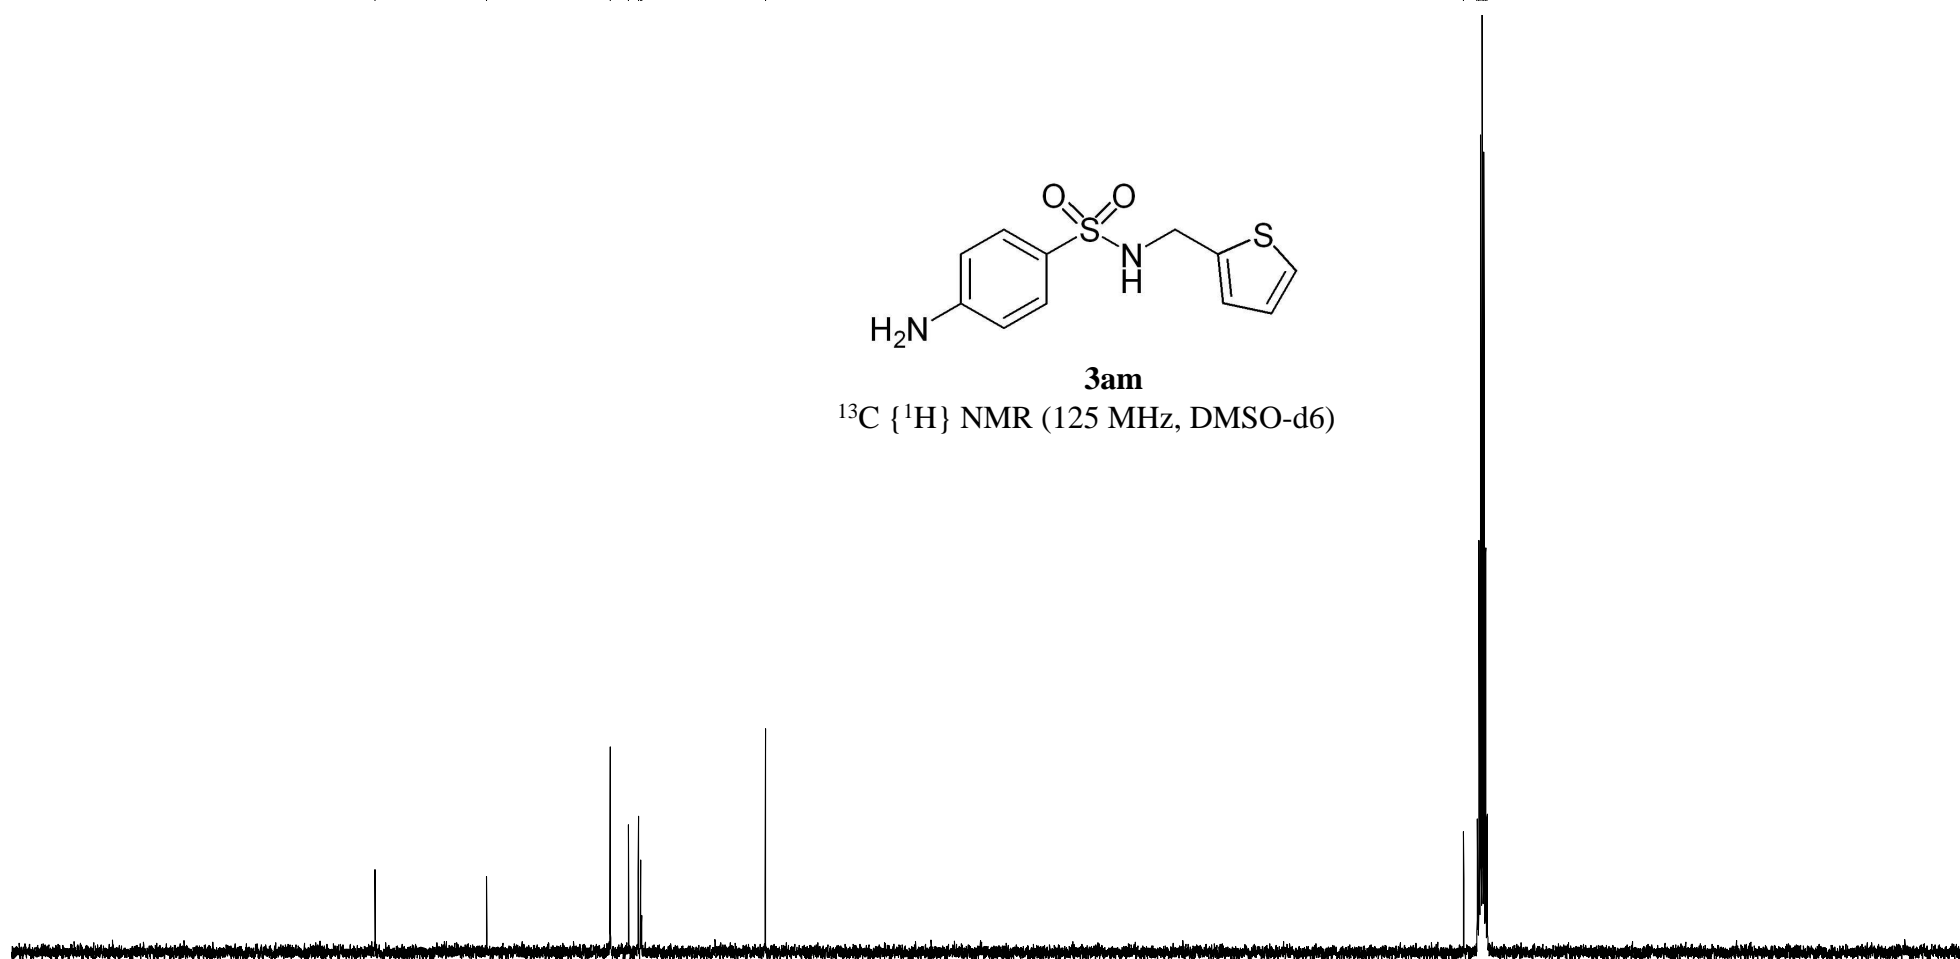

180 170 160 150 140 130 120 110 100 90 80 70 60 50 40 30 20 10 0 ppm

4-amino-N-(naphthalen-1-ylmethyl) benzenesulfonamide  
Proton DMSO-d6

7.928  
7.922  
7.859  
7.855  
7.844  
7.840  
7.653  
7.640  
7.628  
7.545  
7.542  
7.534  
7.525  
7.508  
7.445  
7.431  
7.416  
7.404  
6.654  
6.637  
5.968

4.291  
4.278

2.500

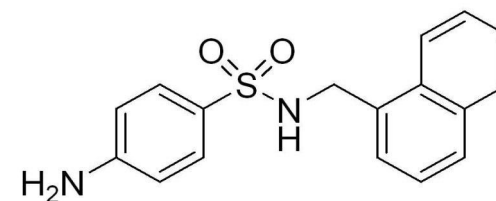

**3an**

<sup>1</sup>H NMR (500 MHz, DMSO-d6)

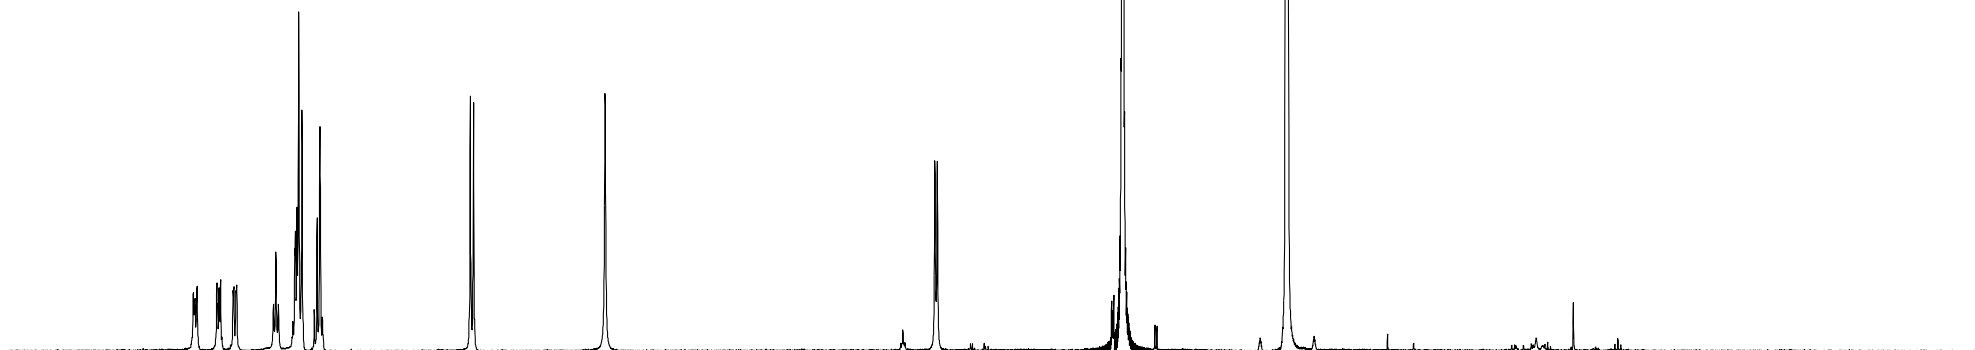

8.5

1.06

1.06

1.02

1.08

4.00

2.04

2.02

2.02

2.04

ppm

4-amino-N-(naphthalen-1-ylmethyl)benzenesulfonamide  
C13CPD DMSO-d6

152.873  
133.548  
133.347  
131.266  
128.904  
128.717  
128.312  
126.802  
126.470  
126.080  
125.588  
123.962  
113.034

44.770  
40.293  
40.127  
39.960  
39.793  
39.626  
39.459  
39.291

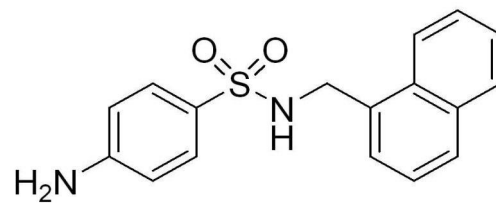

**3an**

$^{13}\text{C}$  { $^1\text{H}$ } NMR (125 MHz, DMSO-d6)

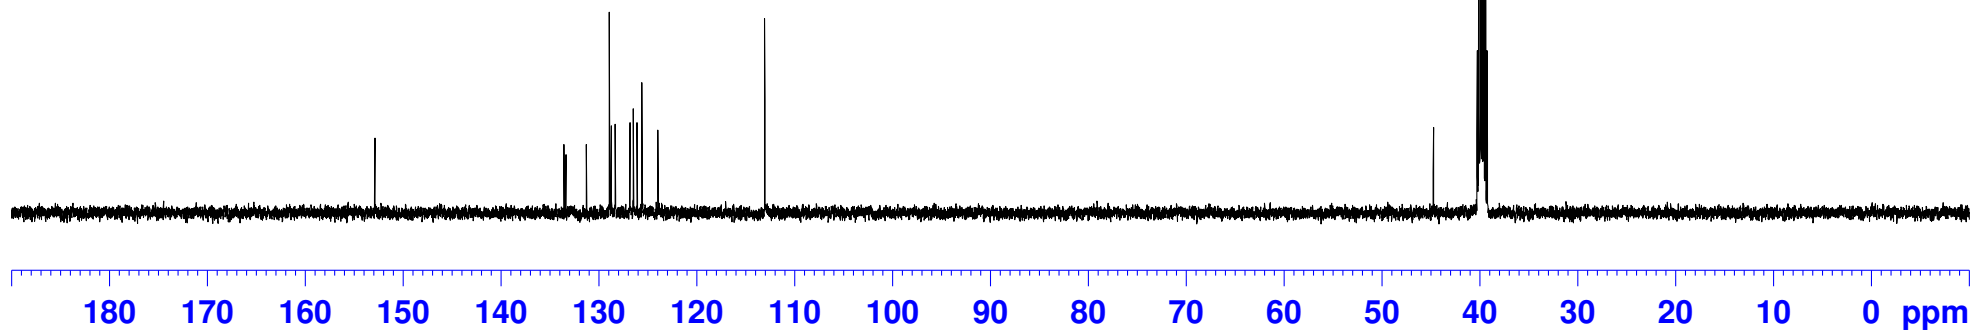

4-amino-N-octylbenzenesulfonamide  
Proton DMSO-d6

7.406  
7.388  
7.029  
7.017  
7.005  
6.608  
6.591

5.882

2.643  
2.629  
2.616  
2.602  
2.500  
1.334  
1.321  
1.307  
1.296  
1.247  
1.233  
1.219  
1.183  
1.176  
1.165  
0.854  
0.841  
0.826

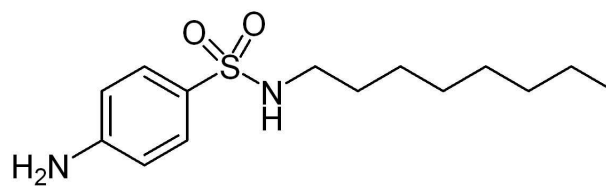

**3ao**

<sup>1</sup>H NMR (500 MHz, DMSO-d6)

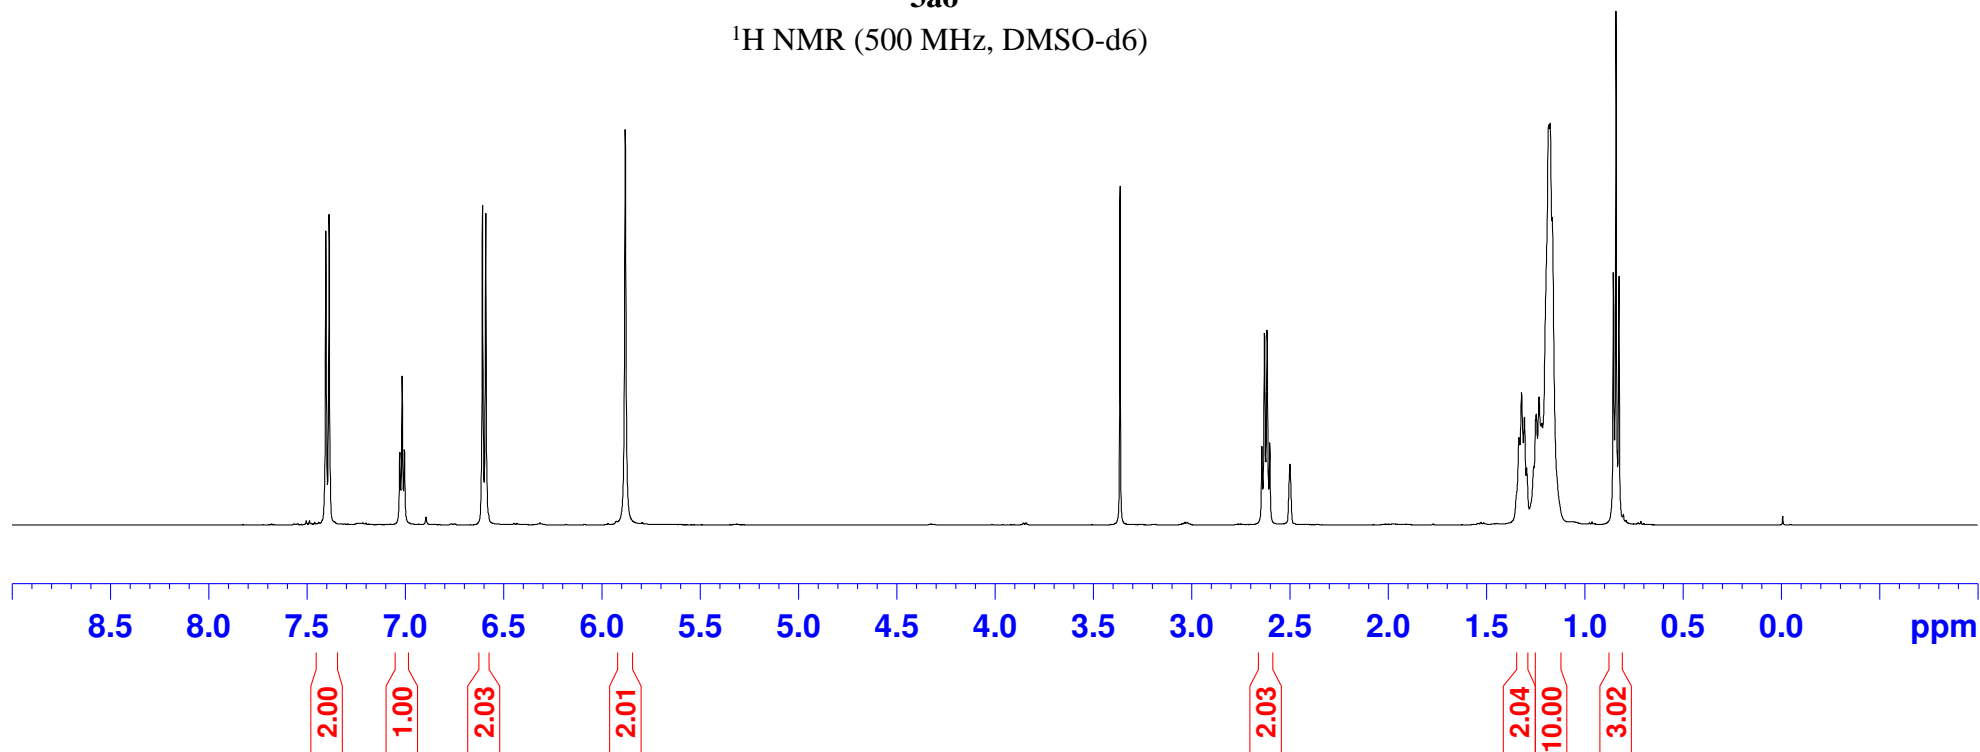

4-amino-N-octylbenzenesulfonamide  
C13CPD DMSO-d6

— 152.633

— 128.660  
— 125.929

— 112.900

42.737  
40.298  
40.131  
39.964  
39.797  
39.630  
39.463  
39.297  
31.486  
29.153  
28.869  
28.834  
26.419  
22.369  
14.221

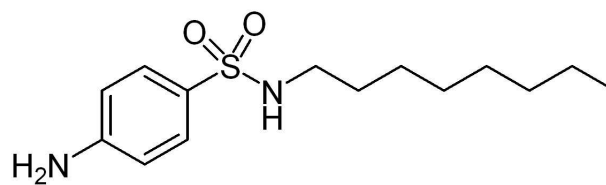

**3ao**

$^{13}\text{C}$   $\{^1\text{H}\}$  NMR (125 MHz, DMSO-d6)

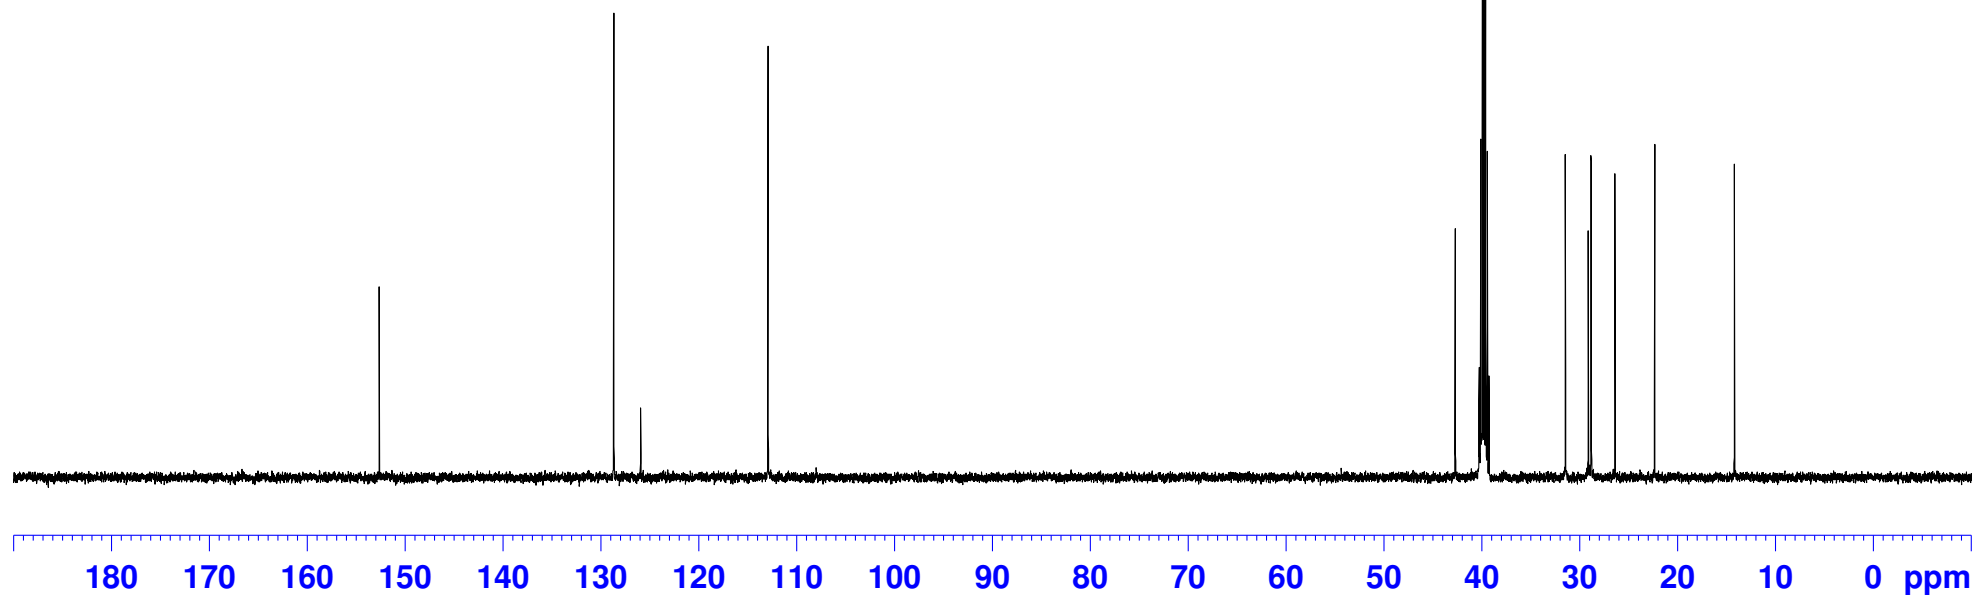

4-amino-N-pentylbenzenesulfonamide  
Proton DMSO-d6

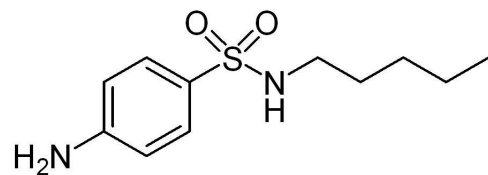

**3ap**

<sup>1</sup>H NMR (500 MHz, DMSO-d6)

7.409  
7.391  
7.033  
7.021  
7.009  
6.611  
6.593

5.877

2.643  
2.629  
2.616  
2.603  
2.498  
1.355  
1.340  
1.326  
1.312  
1.298  
1.185  
1.178  
1.171  
1.164  
0.813  
0.799  
0.785

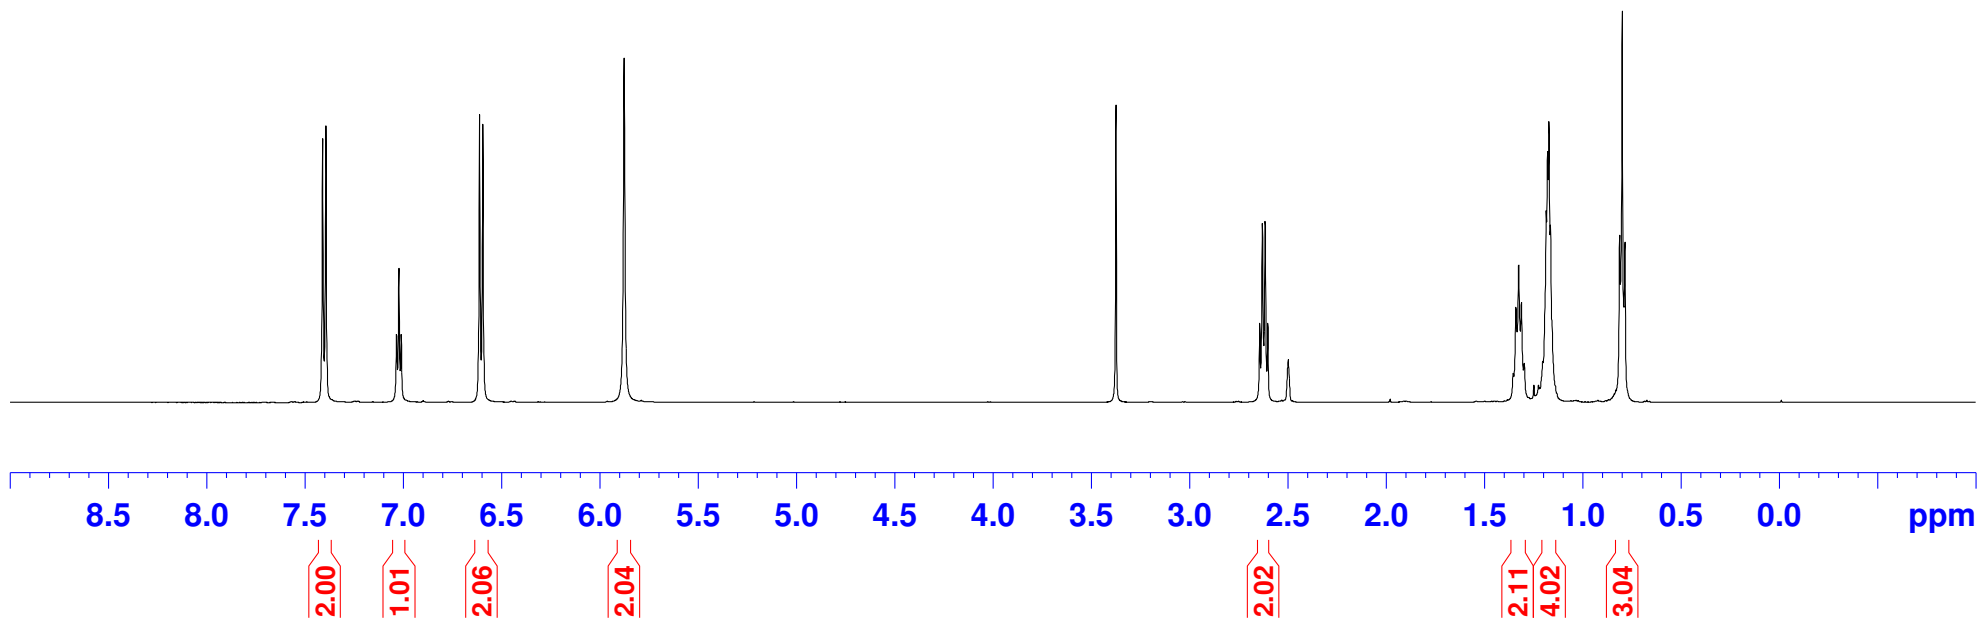

4-amino-N-pentylbenzenesulfonamide  
C13CPD DMSO-d6

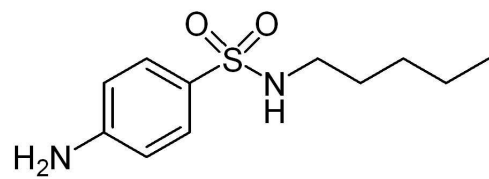

**3ap**

$^{13}\text{C}$  { $^1\text{H}$ } NMR (125 MHz, DMSO-d6)

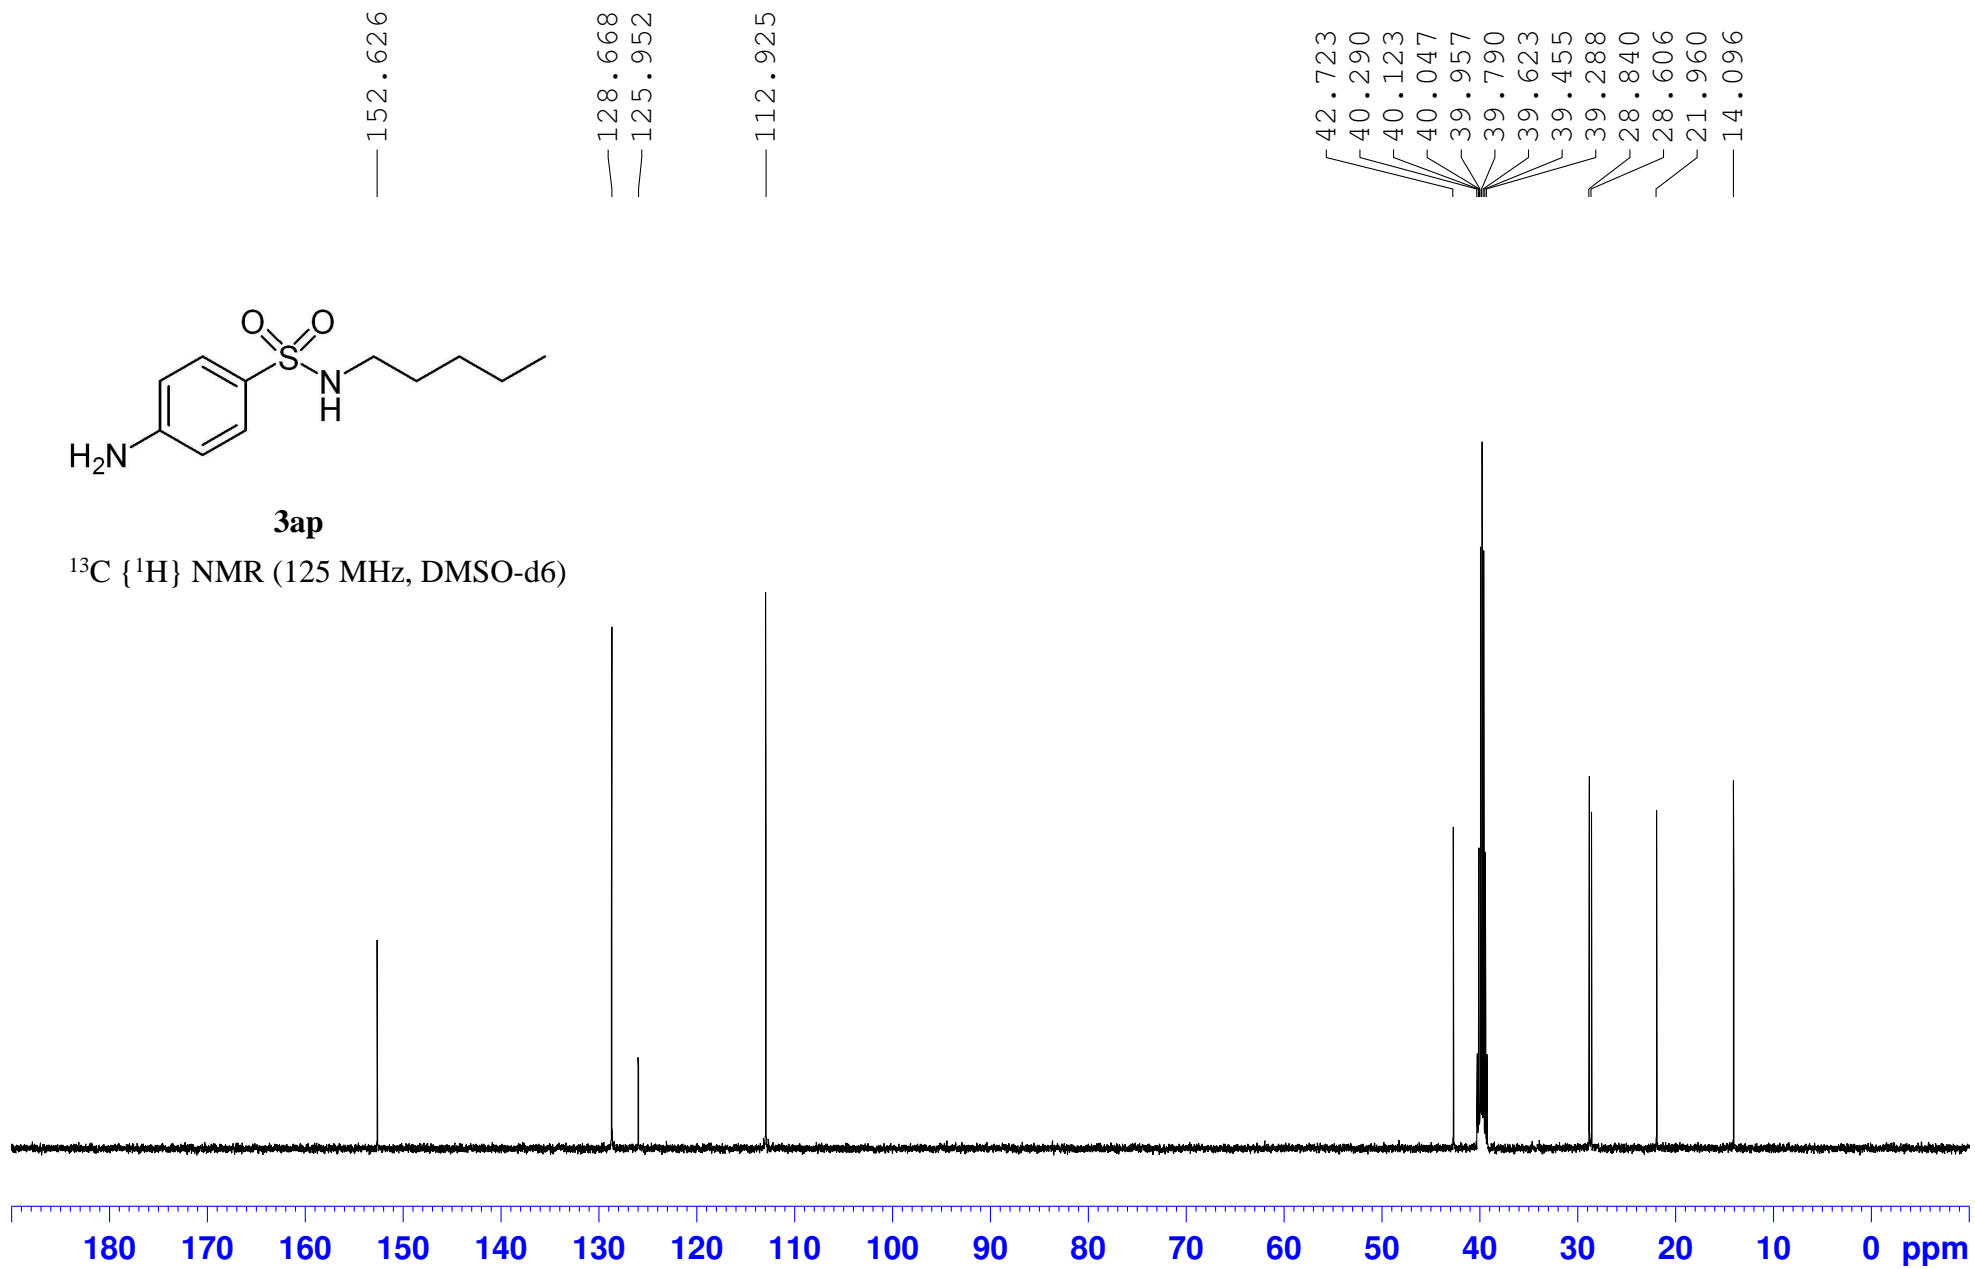



4-amino-N-butylbenzenesulfonamide  
Proton DMSO-d6

7.405  
7.388  
7.042  
7.030  
7.018  
6.607  
6.590

5.892

2.645  
2.631  
2.618  
2.605  
2.500  
1.338  
1.324  
1.310  
1.295  
1.280  
1.248  
1.233  
1.218  
1.203  
1.188  
0.796  
0.782  
0.767

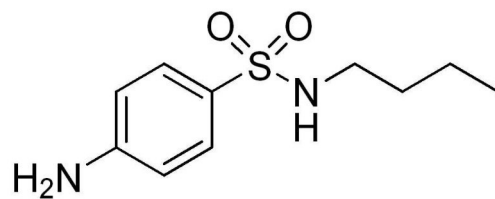

**3aq**  
<sup>1</sup>H NMR (500 MHz, DMSO-d6)

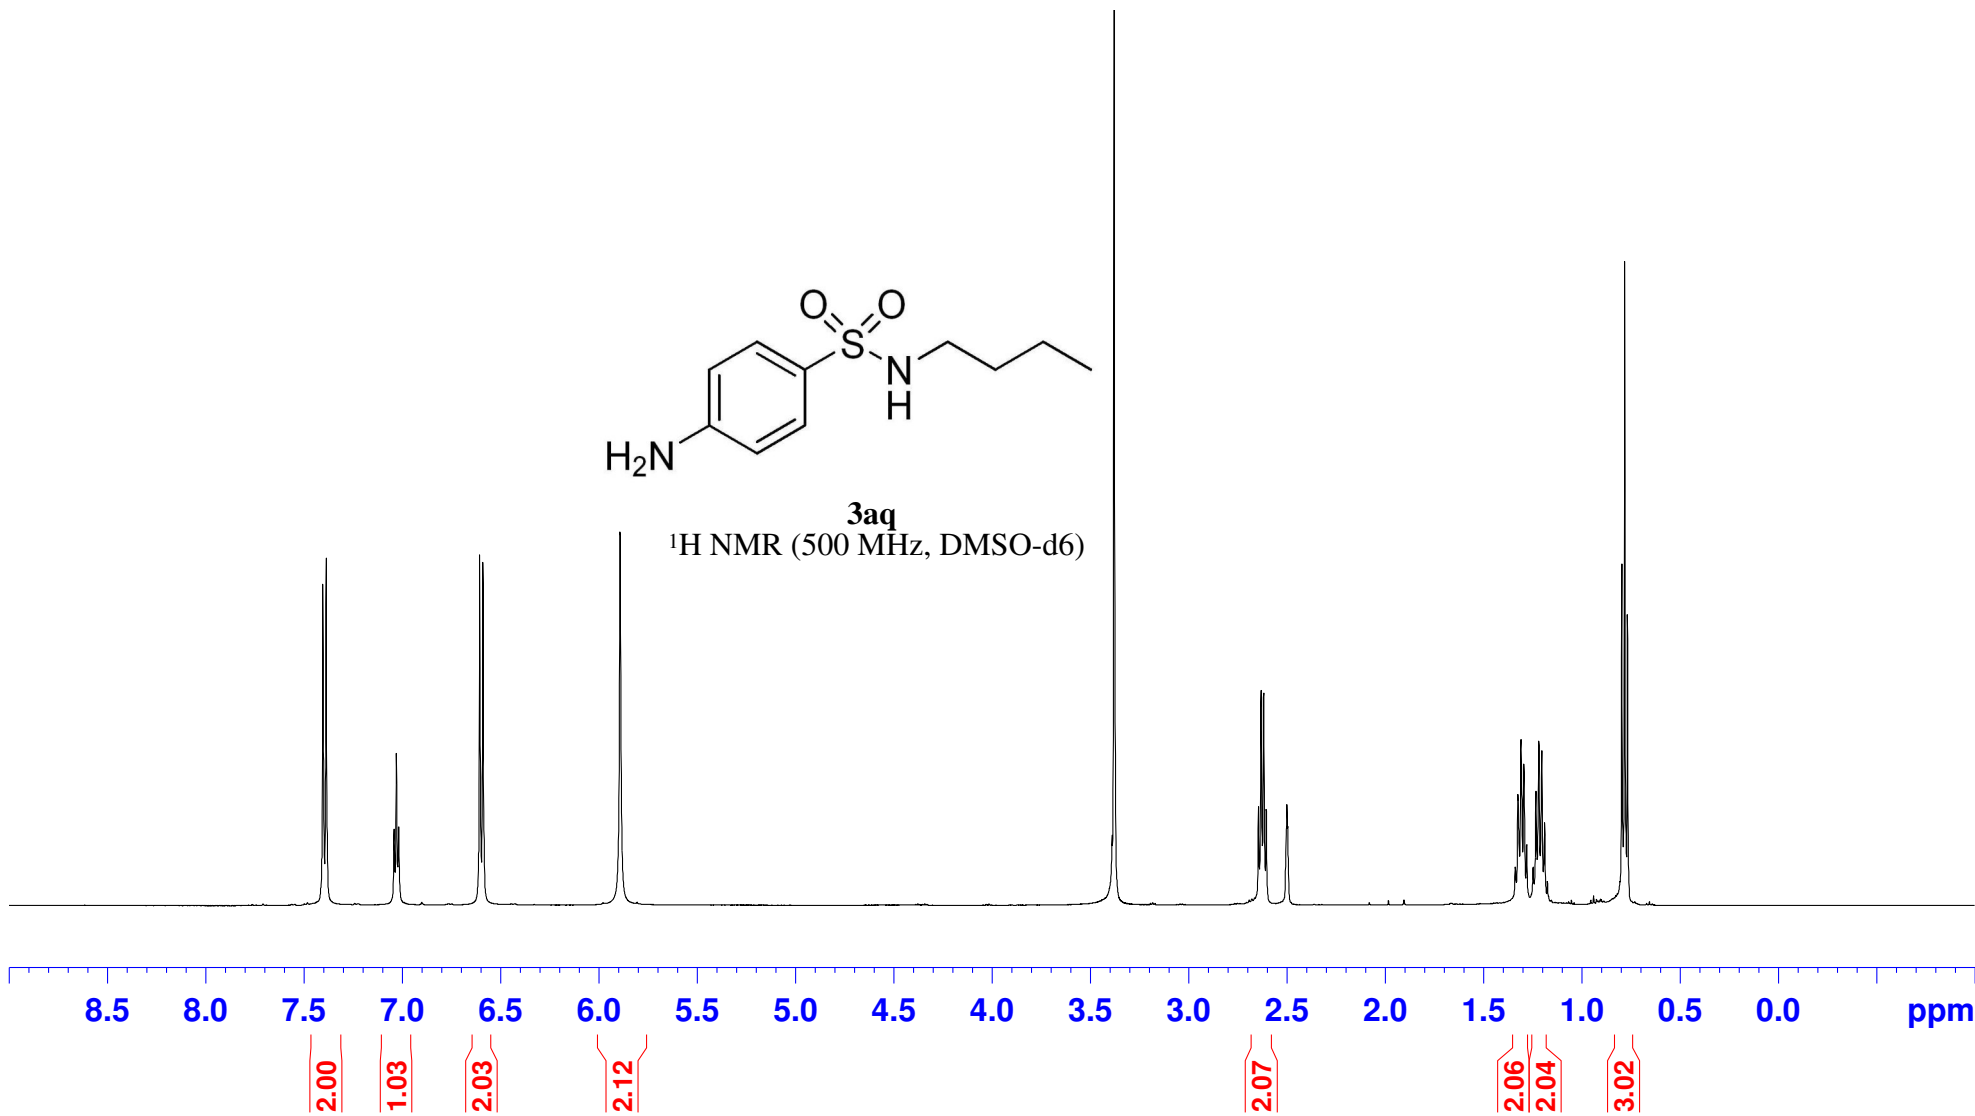

4-amino-N-butylbenzenesulfonamide  
C13CPD DMSO-d6

— 152.632

— 128.673  
— 125.884

— 112.923

42.420  
40.271  
40.105  
39.937  
39.770  
39.603  
39.437  
39.270  
31.258  
— 19.593  
— 13.799

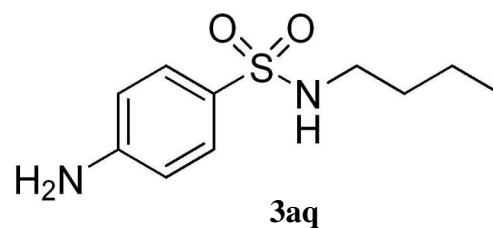

$^{13}\text{C}$  { $^1\text{H}$ } NMR (125 MHz, DMSO-d6)

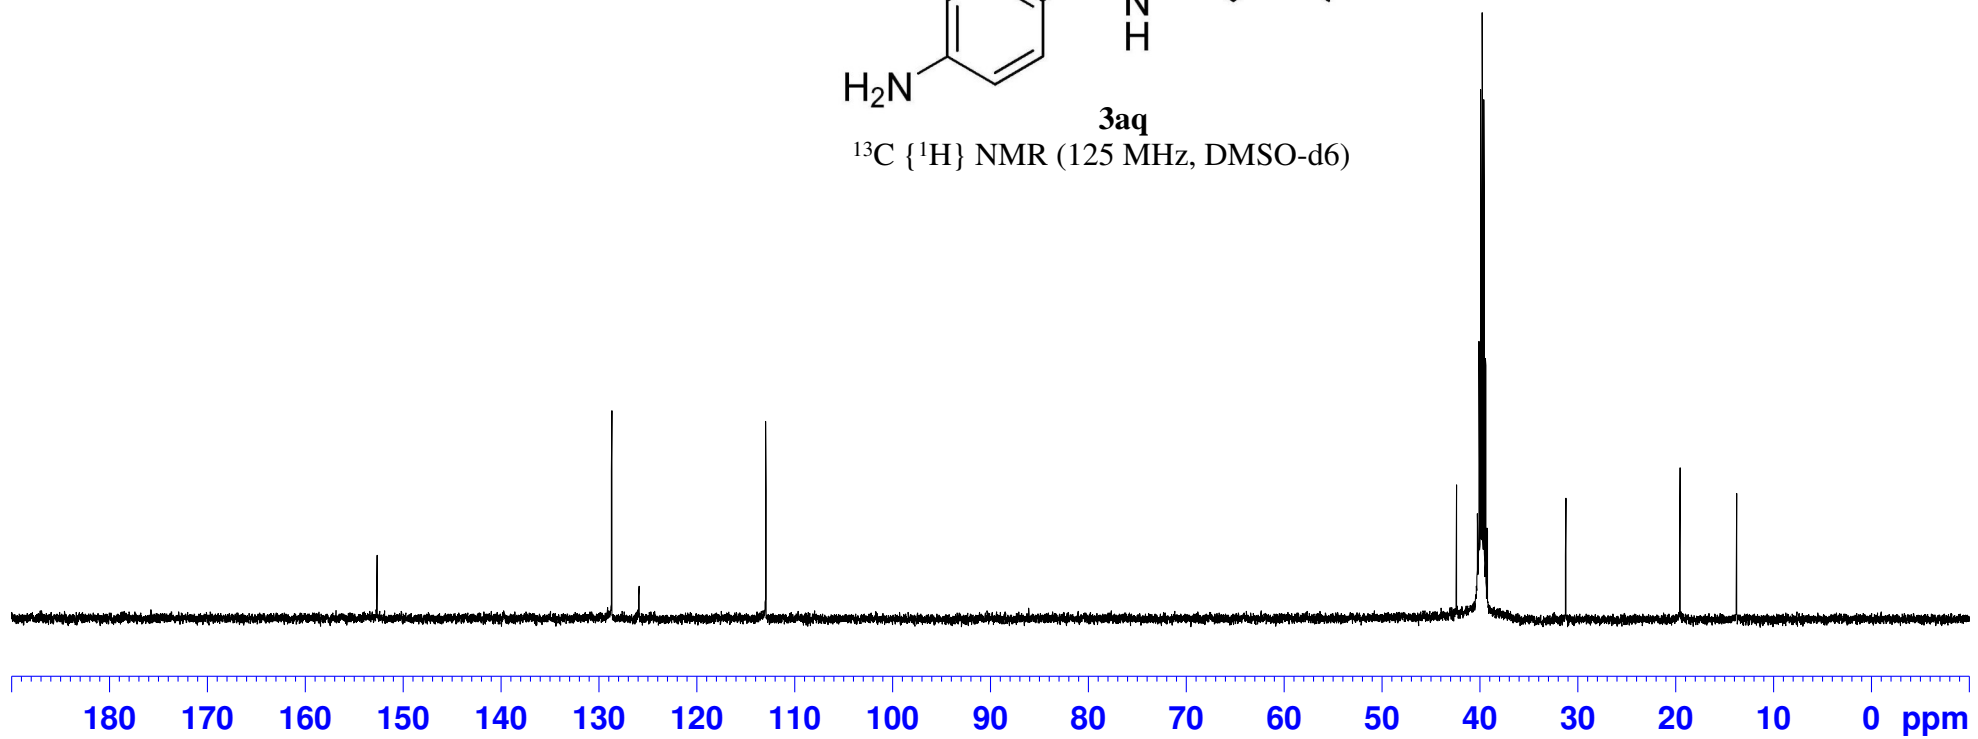

4-amino-N-(cyclohexylmethyl)benzenesulfonamide  
Proton DMSO-d6

7.401  
7.384  
7.064  
7.051  
7.039  
6.603  
6.586

5.879

2.500  
2.471  
2.458  
2.445  
1.637  
1.612  
1.595  
1.571  
1.316  
1.309  
1.302  
1.294  
1.288  
1.281  
1.273  
1.266  
1.259  
1.251  
1.118  
1.091  
1.077  
1.047  
0.797  
0.774  
0.752  
0.733  
0.724

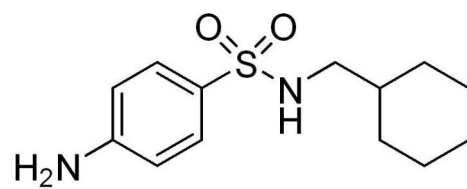

**3ar**  
<sup>1</sup>H NMR (500 MHz, DMSO-d6)

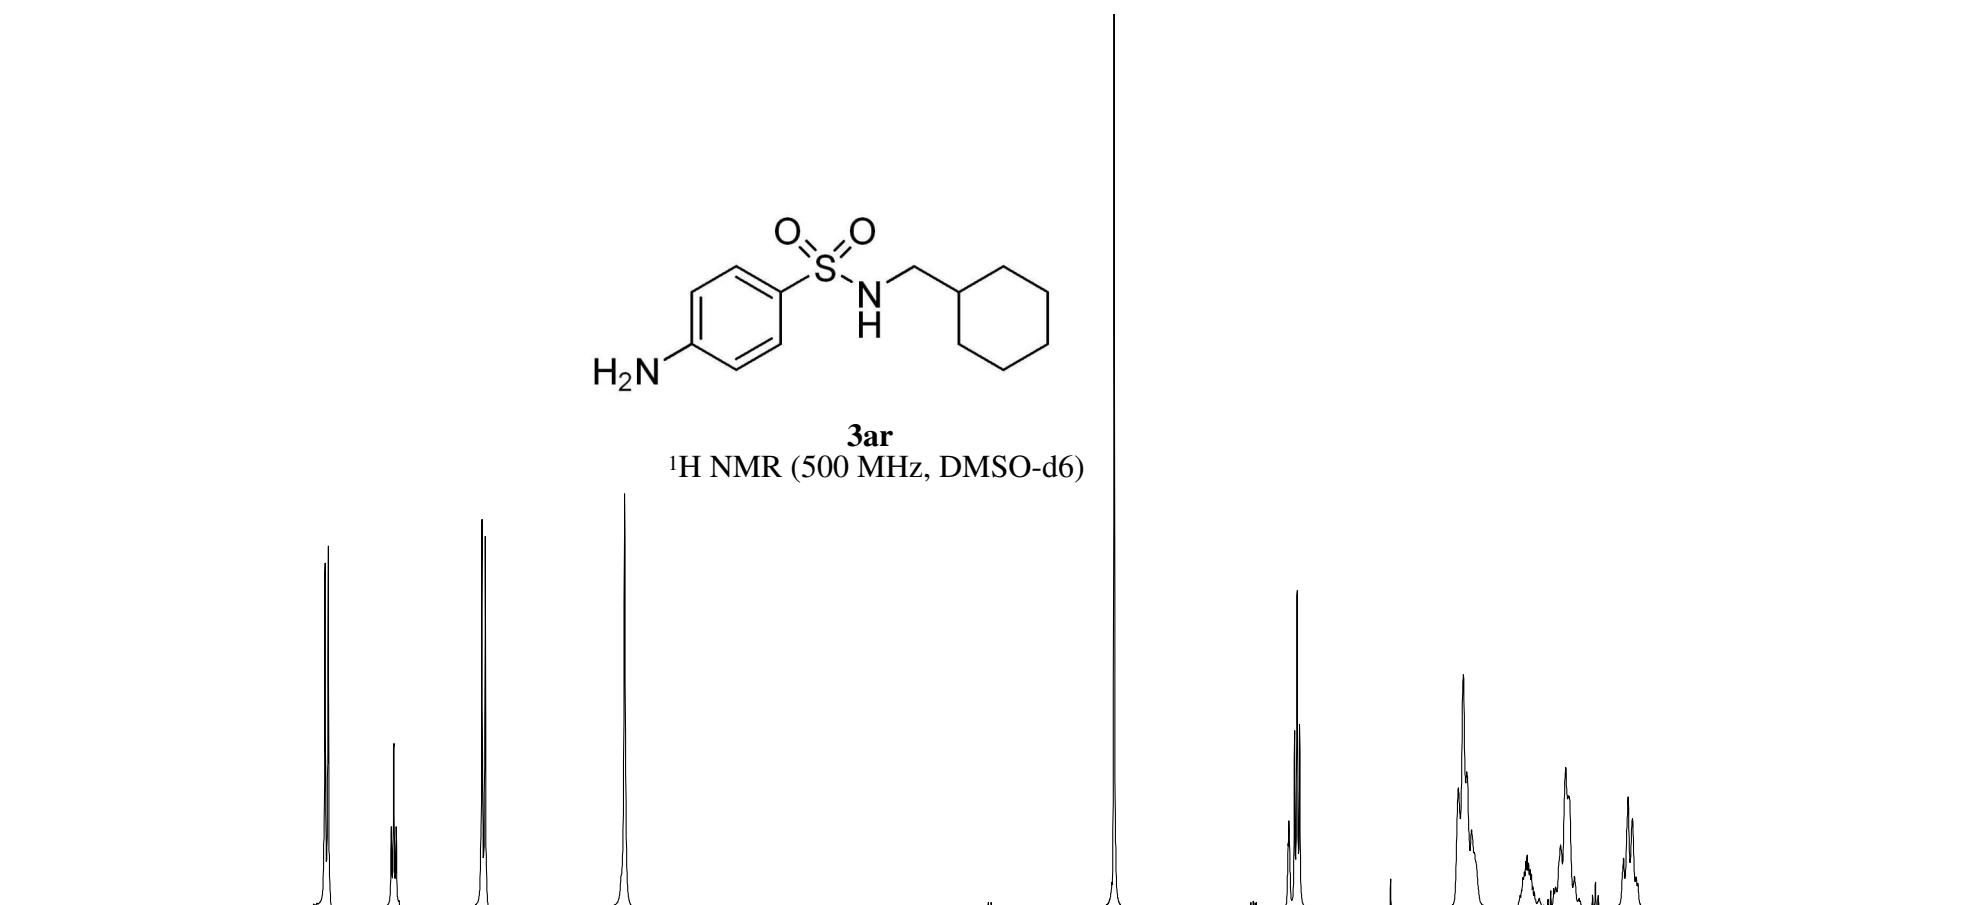

8.5

8.0

7.5

7.0

6.5

6.0

5.5

5.0

4.5

4.0

3.5

3.0

2.5

2.0

1.5

1.0

0.5

0.0

ppm

2.02

1.04

2.04

2.05

2.00

5.08

1.07

3.02

2.02

4-amino-N-(cyclohexylmethyl)benzenesulfonamide  
C13CPD DMSO-d6

— 152.569

— 128.630  
— 126.093

— 112.908

49.039  
40.275  
40.108  
39.941  
39.774  
39.607  
39.440  
39.273  
37.451  
30.563  
26.268  
25.607

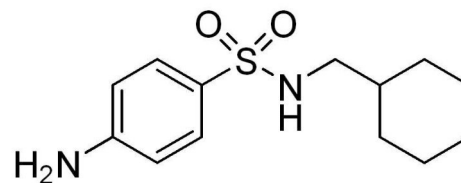

**3ar**

$^{13}\text{C}$  { $^1\text{H}$ } NMR (125 MHz, DMSO-d6)

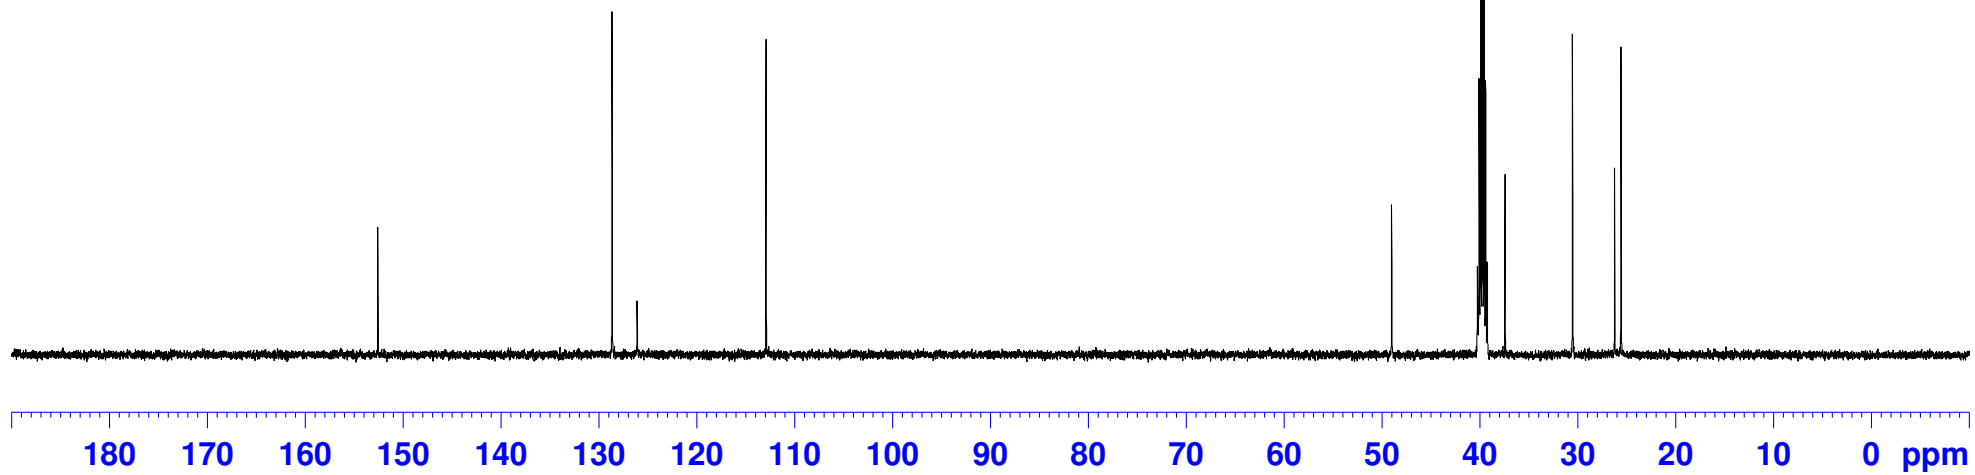

4-amino-N-cyclohexylbenzenesulfonamide  
Proton DMSO-d6

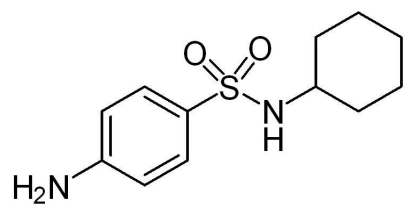

**3as**

<sup>1</sup>H NMR (500 MHz, DMSO-d6)

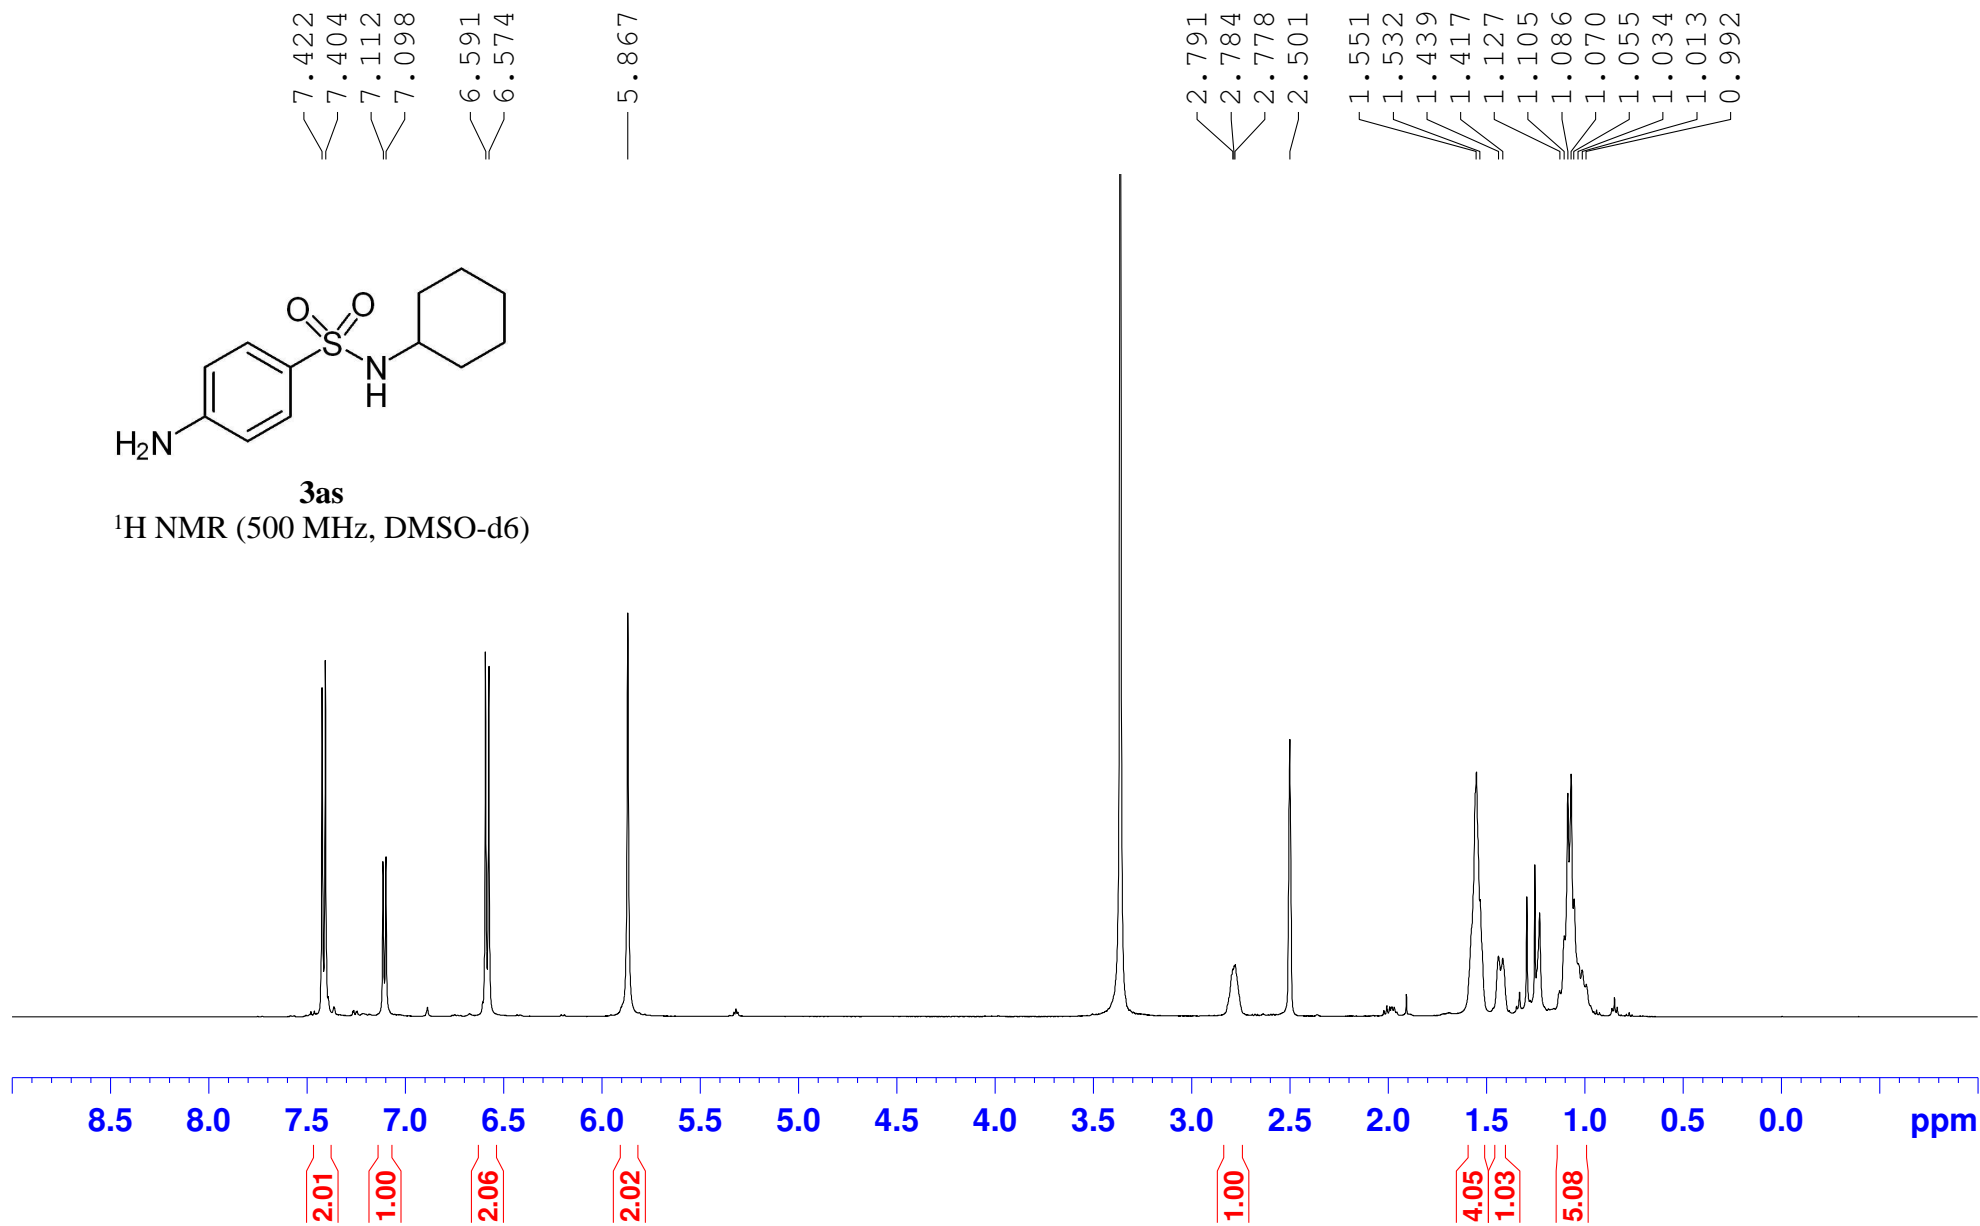

4-amino-N-cyclohexylbenzenesulfonamide  
C13CPD DMSO-d6

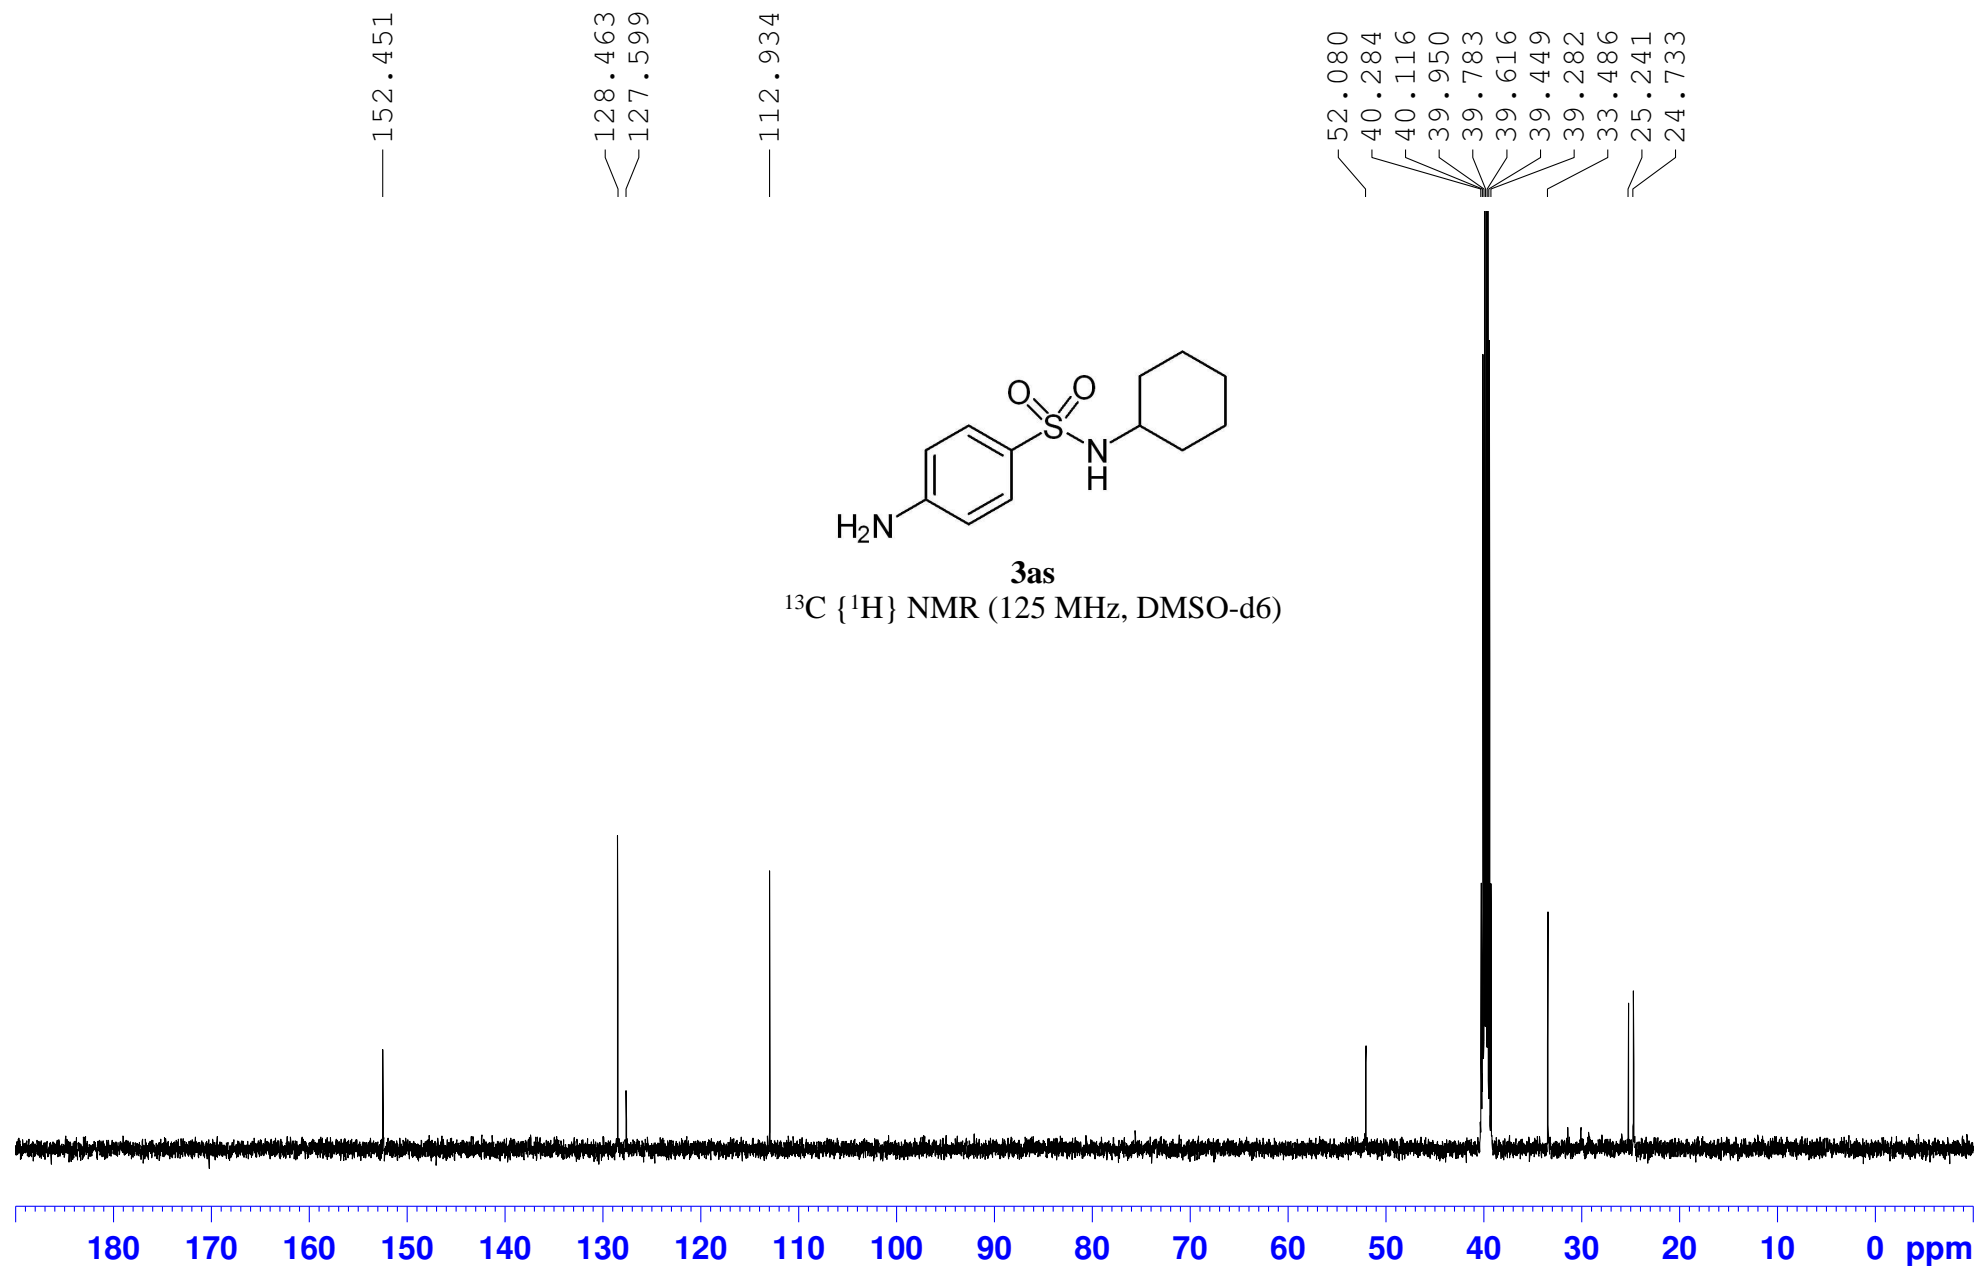

4-amino-N-cyclopentylbenzenesulfonamide  
Proton DMSO-d6

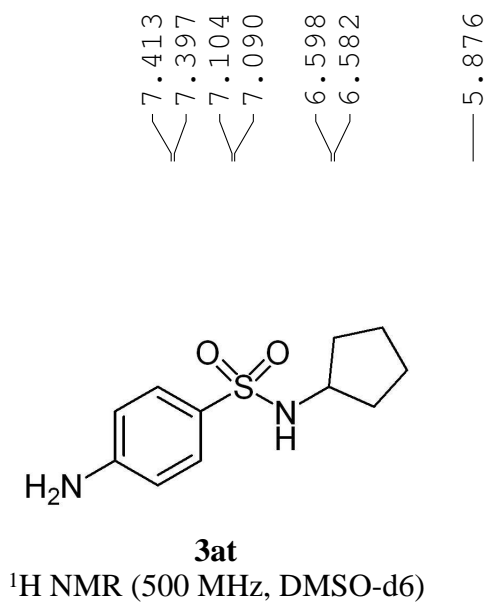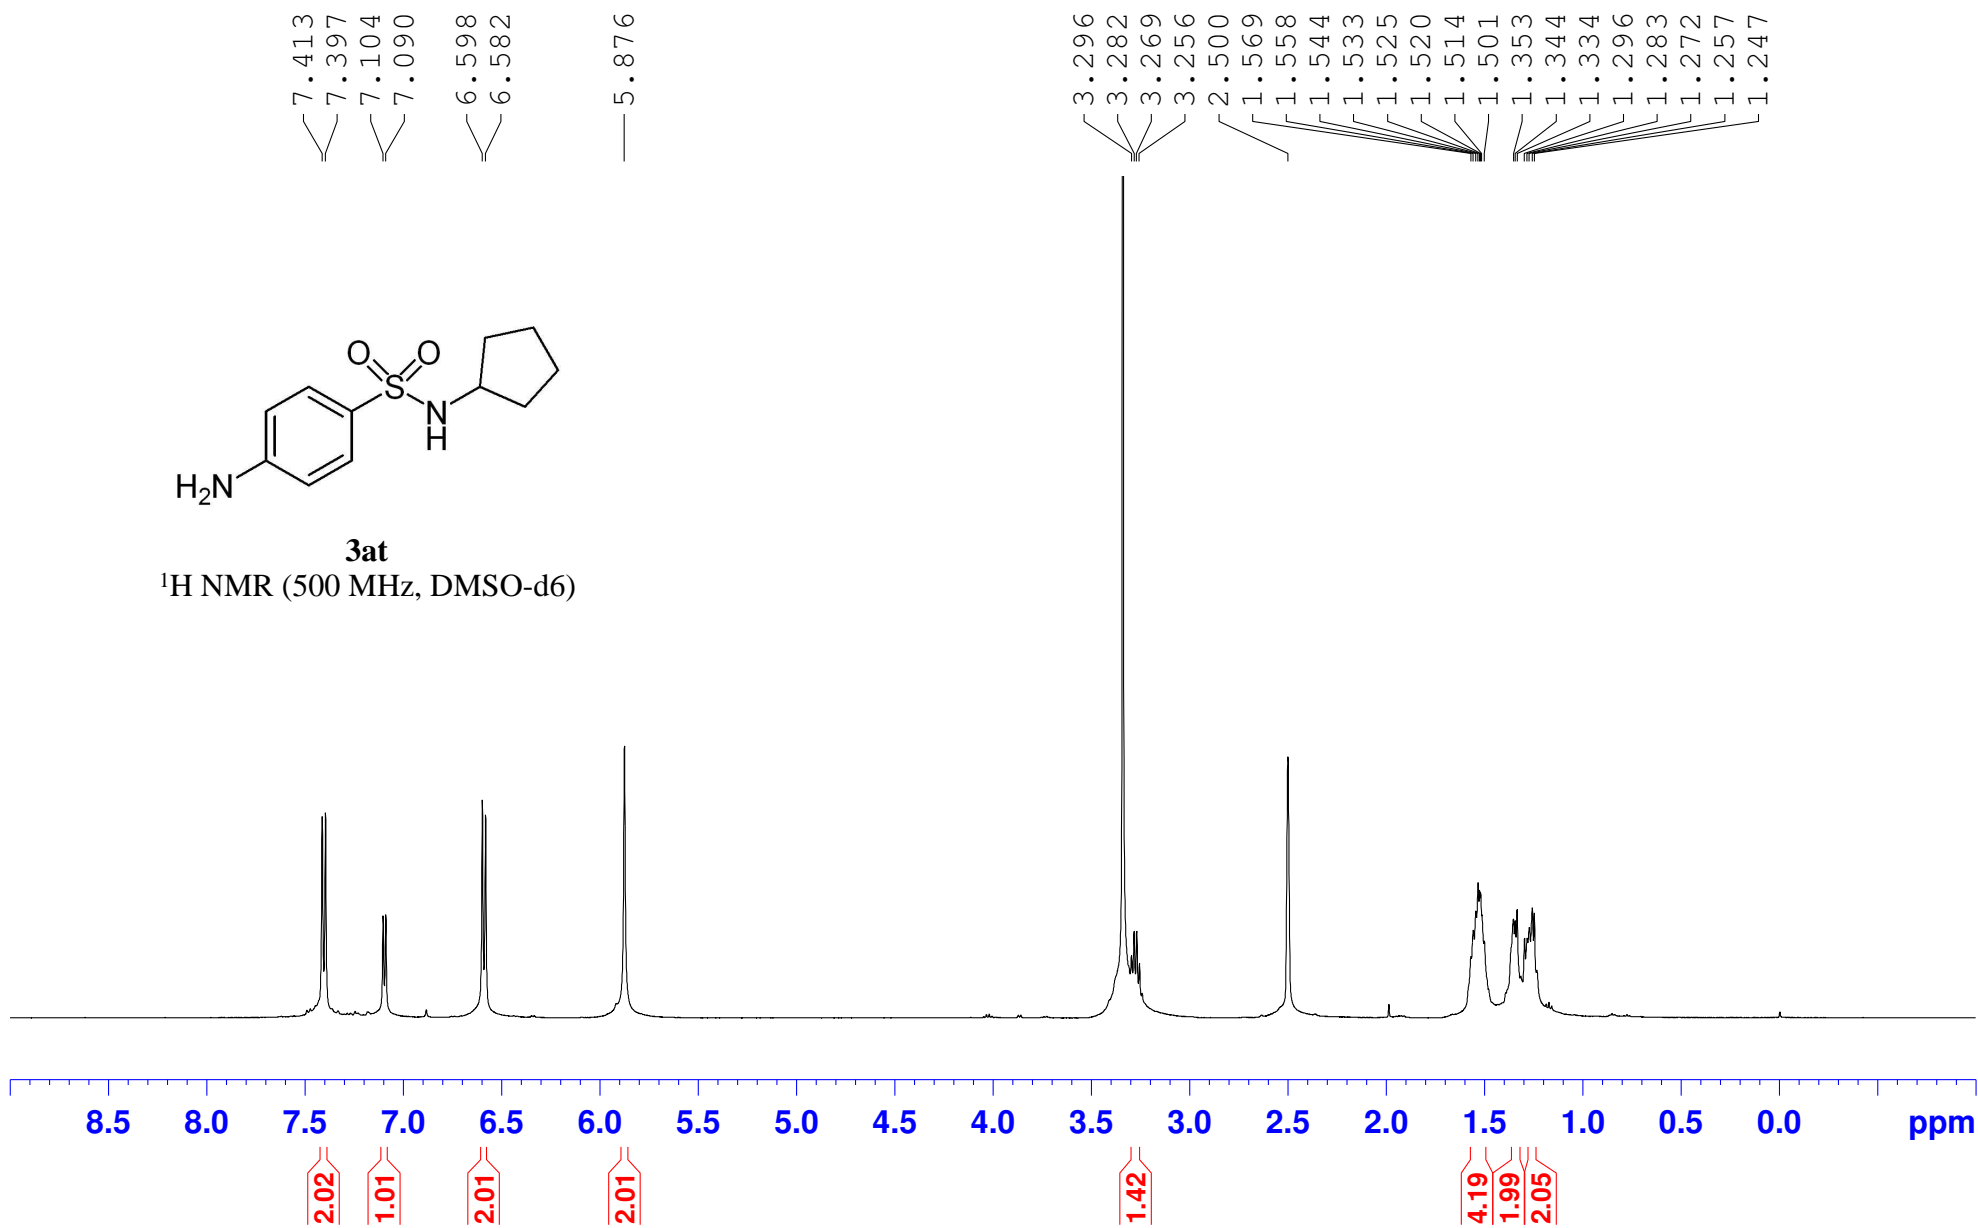

4-amino-N-cyclopentylbenzenesulfonamide  
C13CPD DMSO-d6

— 152.566

— 128.692  
— 126.886

— 112.937

— 54.566  
— 40.291  
— 40.124  
— 39.957  
— 39.790  
— 39.623  
— 39.456  
— 39.289  
— 32.712  
— 23.116

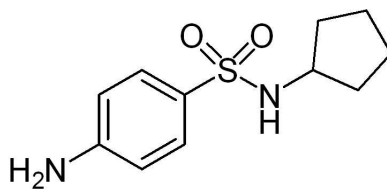

**3at**

$^{13}\text{C}$  { $^1\text{H}$ } NMR (125 MHz, DMSO-d6)

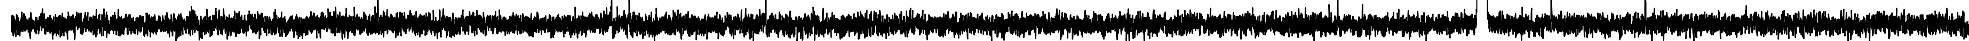

180 170 160 150 140 130 120 110 100 90 80 70 60 50 40 30 20 10 0 ppm



4-amino-N-benzyl-3-bromobenzenesulfonamide  
Proton DMSO-d6

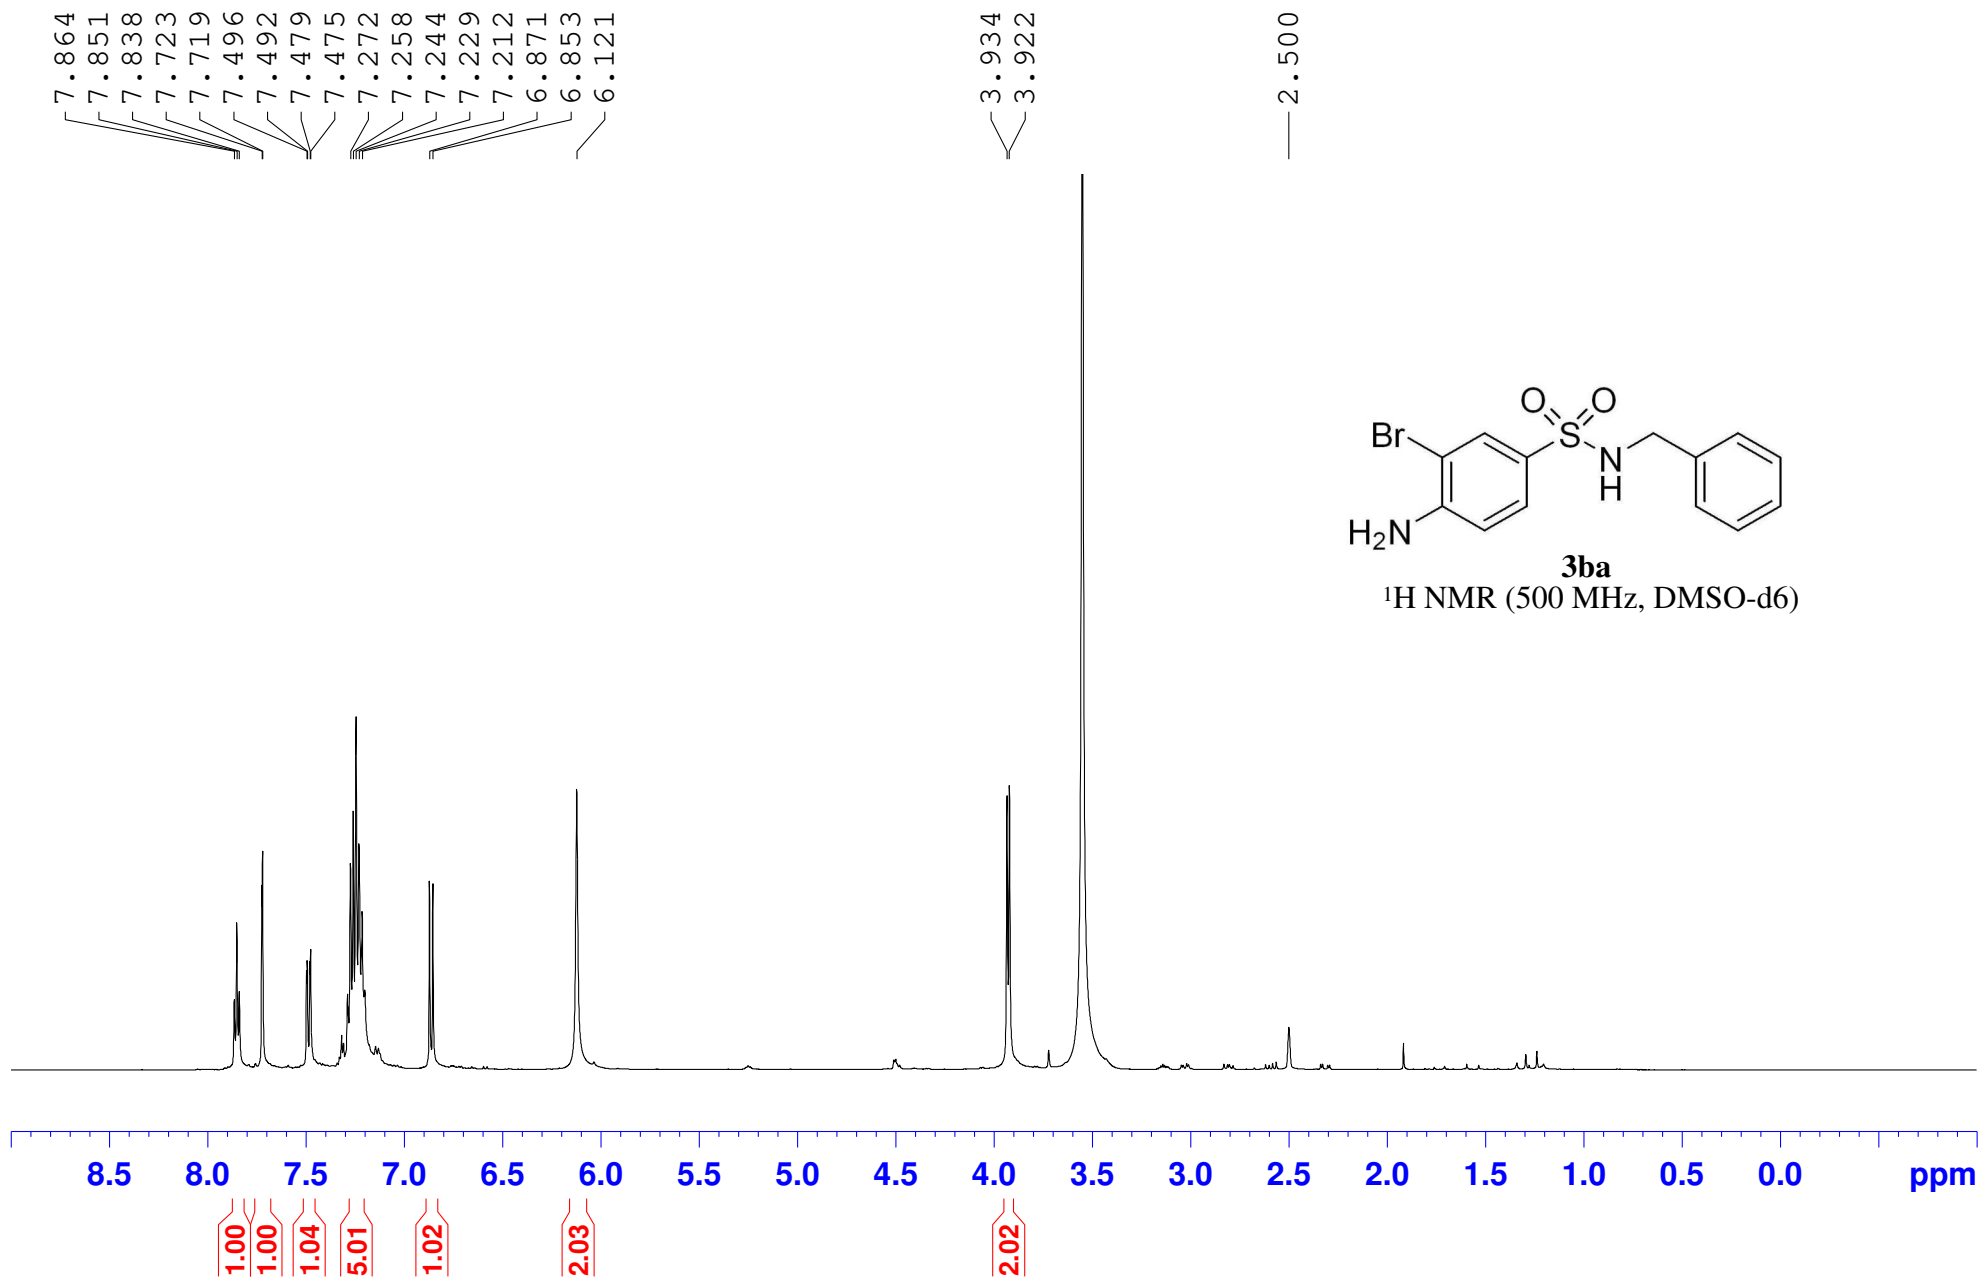

4-amino-N-benzyl-3-bromobenzenesulfonamide  
C13CPD DMSO-d6

— 149.630  
— 137.962  
— 131.410  
— 128.480  
— 128.340  
— 127.877  
— 127.654  
— 127.396  
— 114.498  
— 106.168

— 46.431  
— 40.161  
— 39.994  
— 39.827  
— 39.660  
— 39.493  
— 39.325  
— 39.158

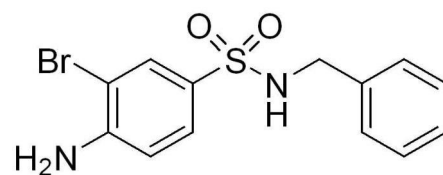

**3ba**

<sup>13</sup>C {<sup>1</sup>H} NMR (125 MHz, DMSO-d6)

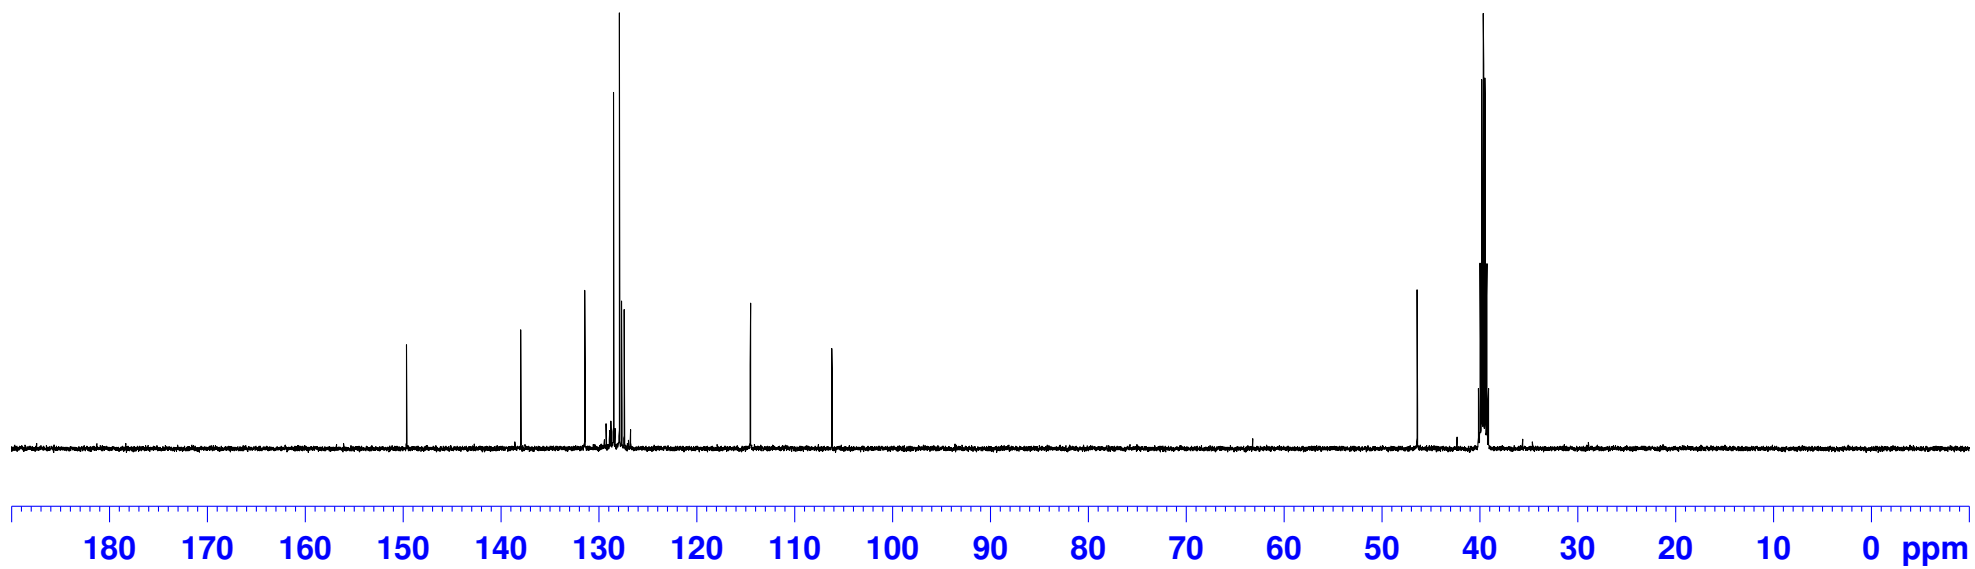

4-amino-N-benzyl-3,5-dibromobenzenesulfonamide  
Proton DMSO-d6

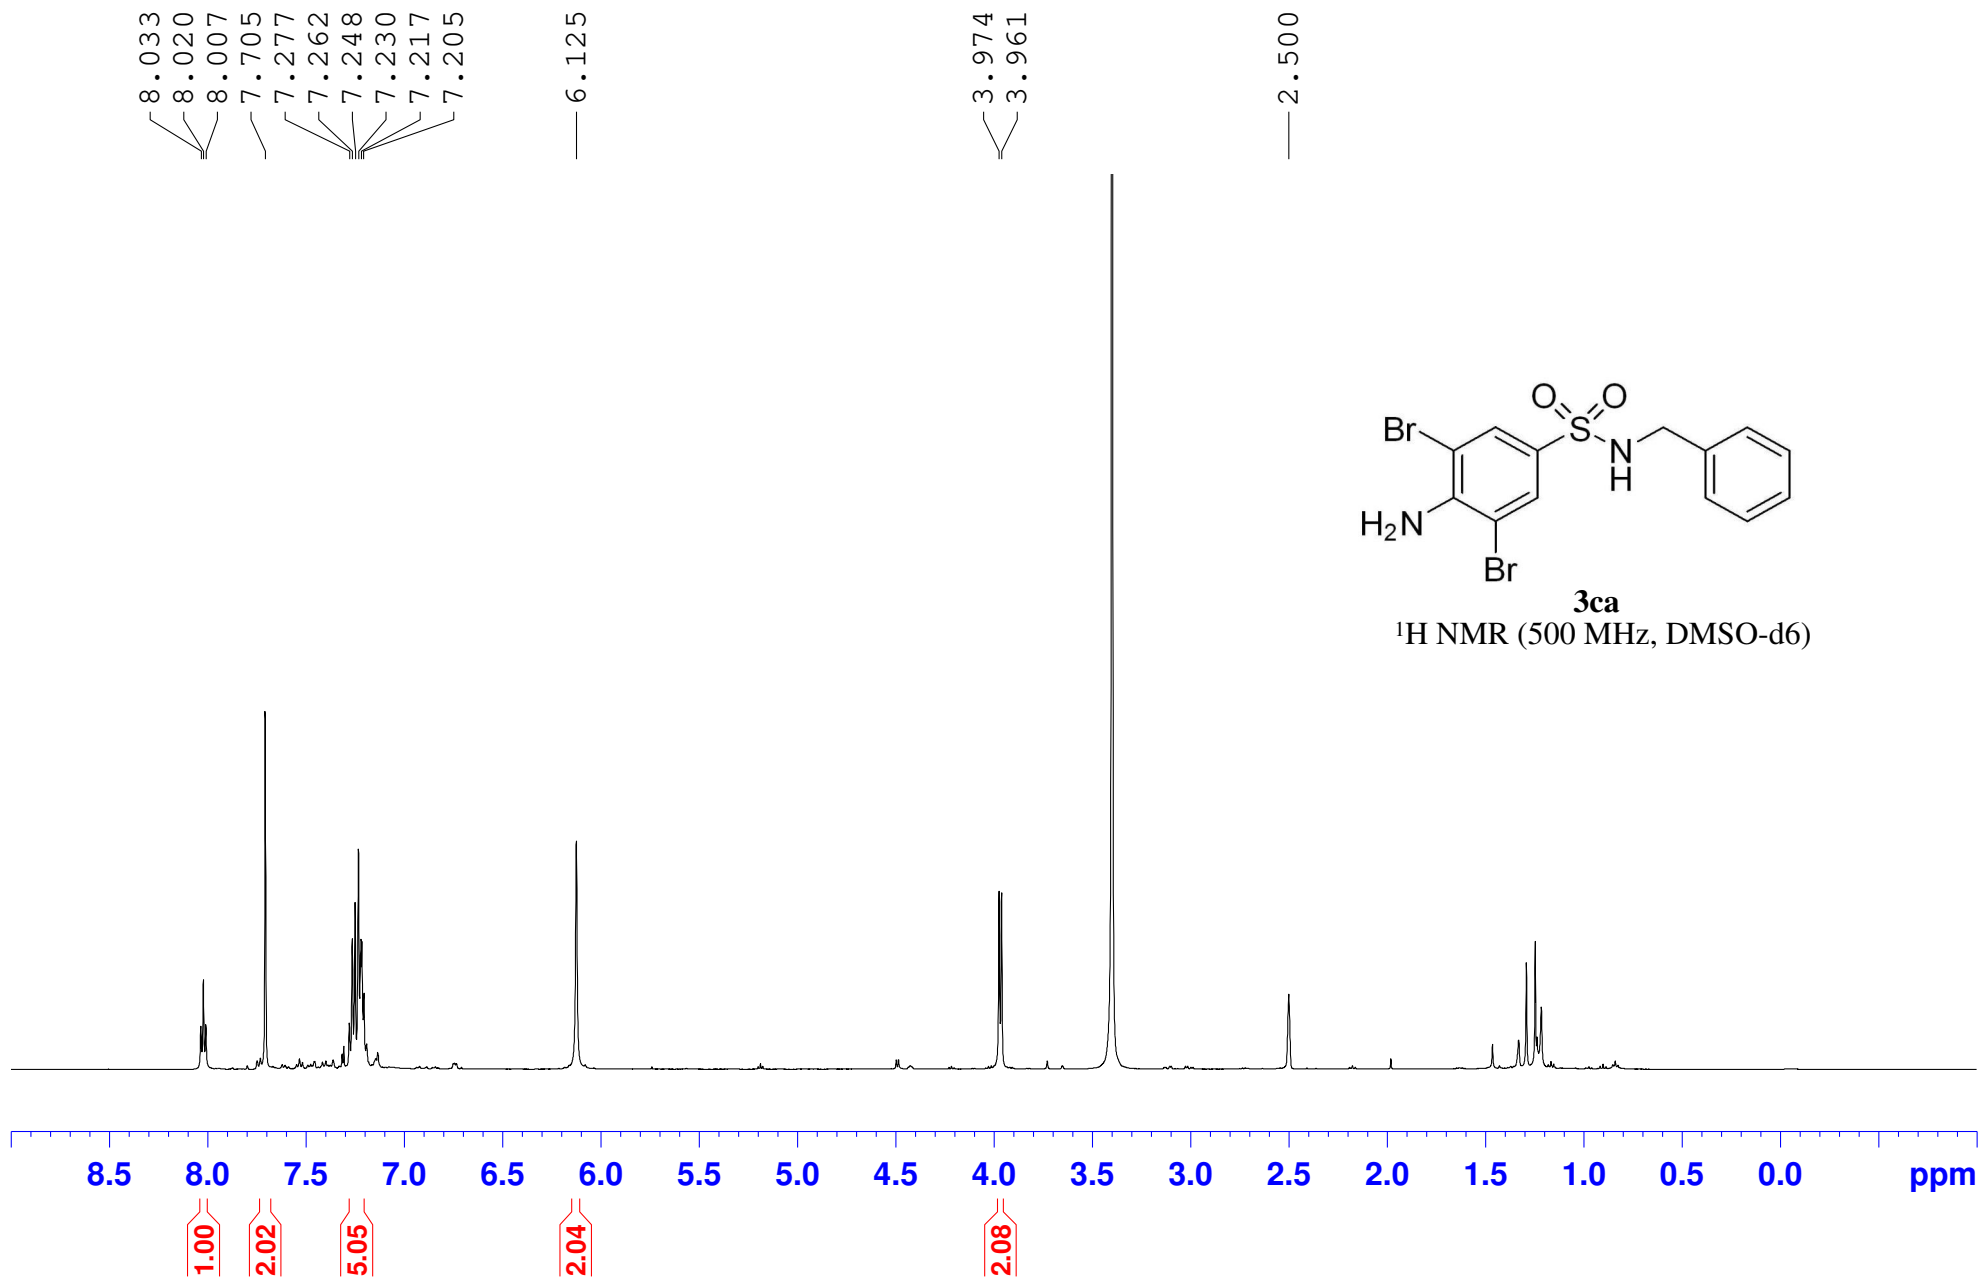

4-amino-N-benzyl-3,5-dibromobenzenesulfonamide  
C13CPD DMSO-d6

— 146.517  
— 137.650  
— 130.602  
— 129.154  
— 128.427  
— 127.929  
— 127.425

— 106.577

— 46.450  
— 40.254  
— 40.087  
— 39.920  
— 39.752  
— 39.586  
— 39.418  
— 39.252

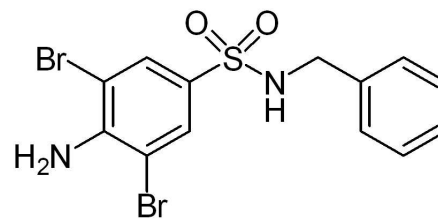

**3ca**

$^{13}\text{C}$  { $^1\text{H}$ } NMR (125 MHz, DMSO-d6)

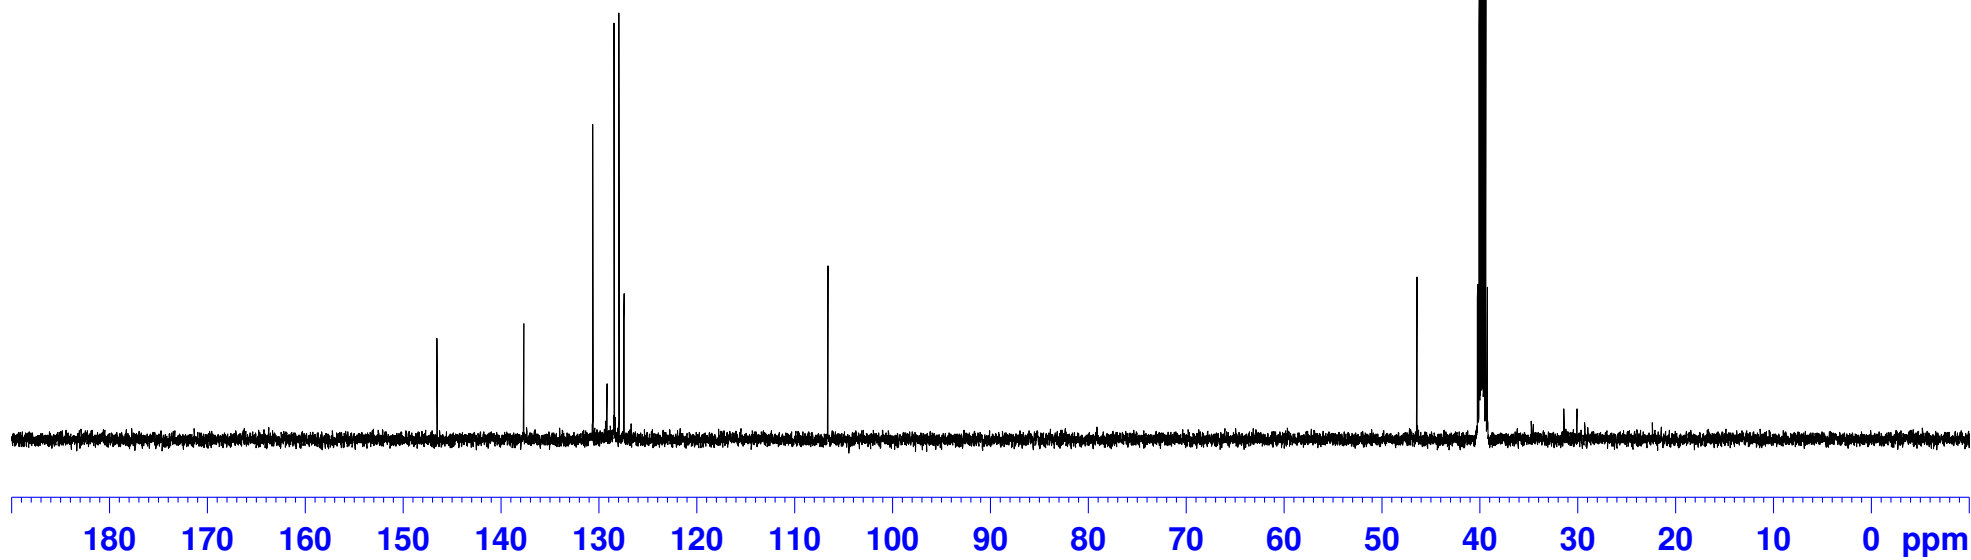

4-amino-N-benzyl-3-chlorobenzenesulfonamide  
Proton DMSO-d6

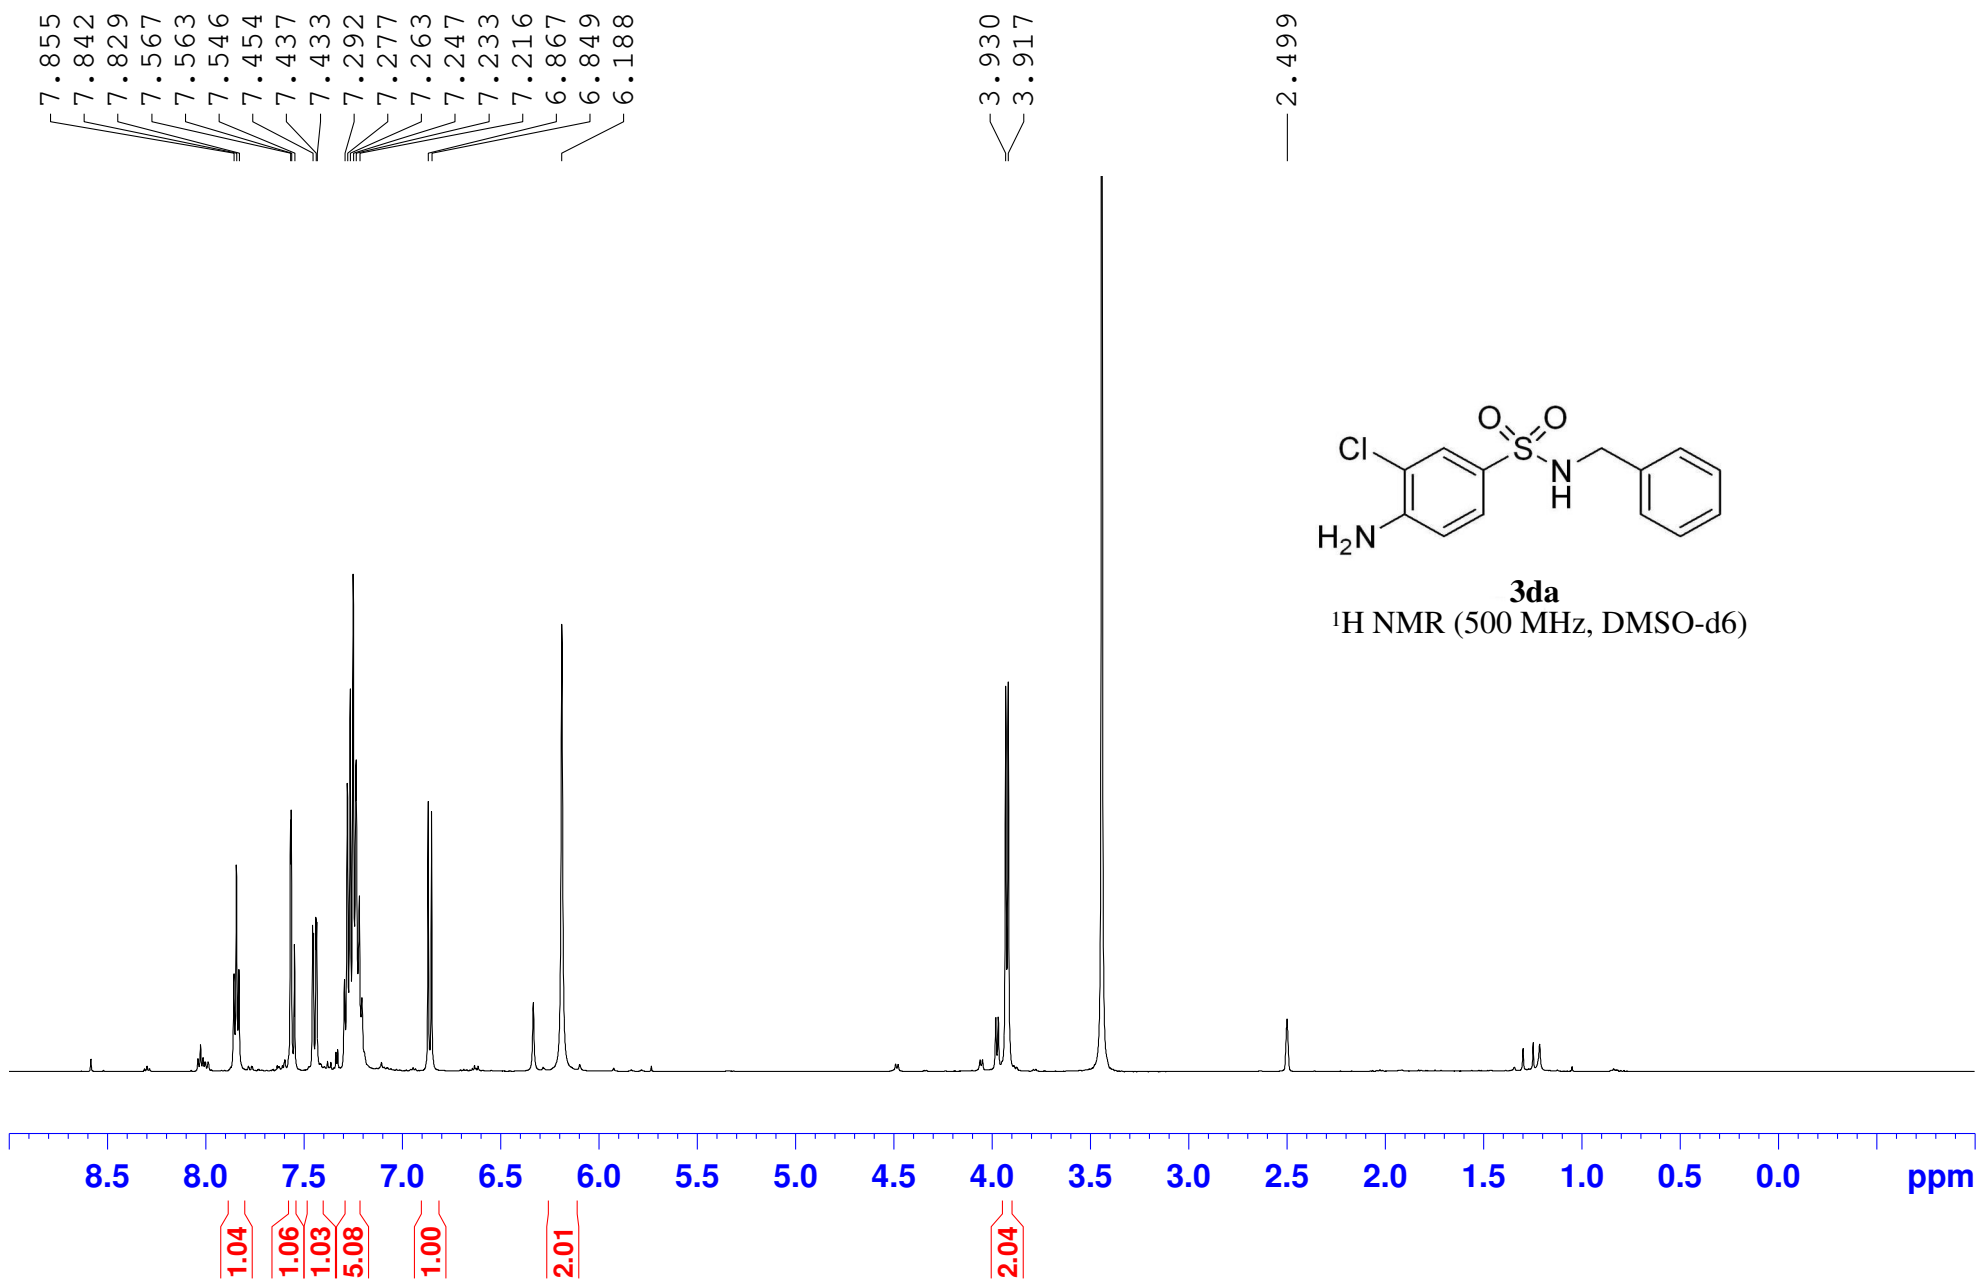

4-amino-N-benzyl-3-chlorobenzenesulfonamide  
C13CPD DMSO-d6

— 148.581  
— 138.038  
— 128.465  
— 128.247  
— 127.884  
— 127.364  
— 127.132  
— 117.433  
— 116.245  
— 114.564

— 46.421  
— 40.285  
— 40.118  
— 39.951  
— 39.784  
— 39.617  
— 39.450  
— 39.283

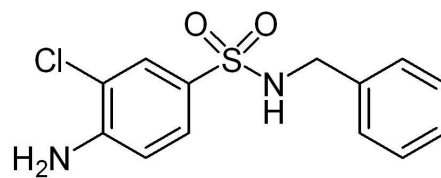

**3da**

<sup>13</sup>C {<sup>1</sup>H} NMR (125 MHz, DMSO-d6)

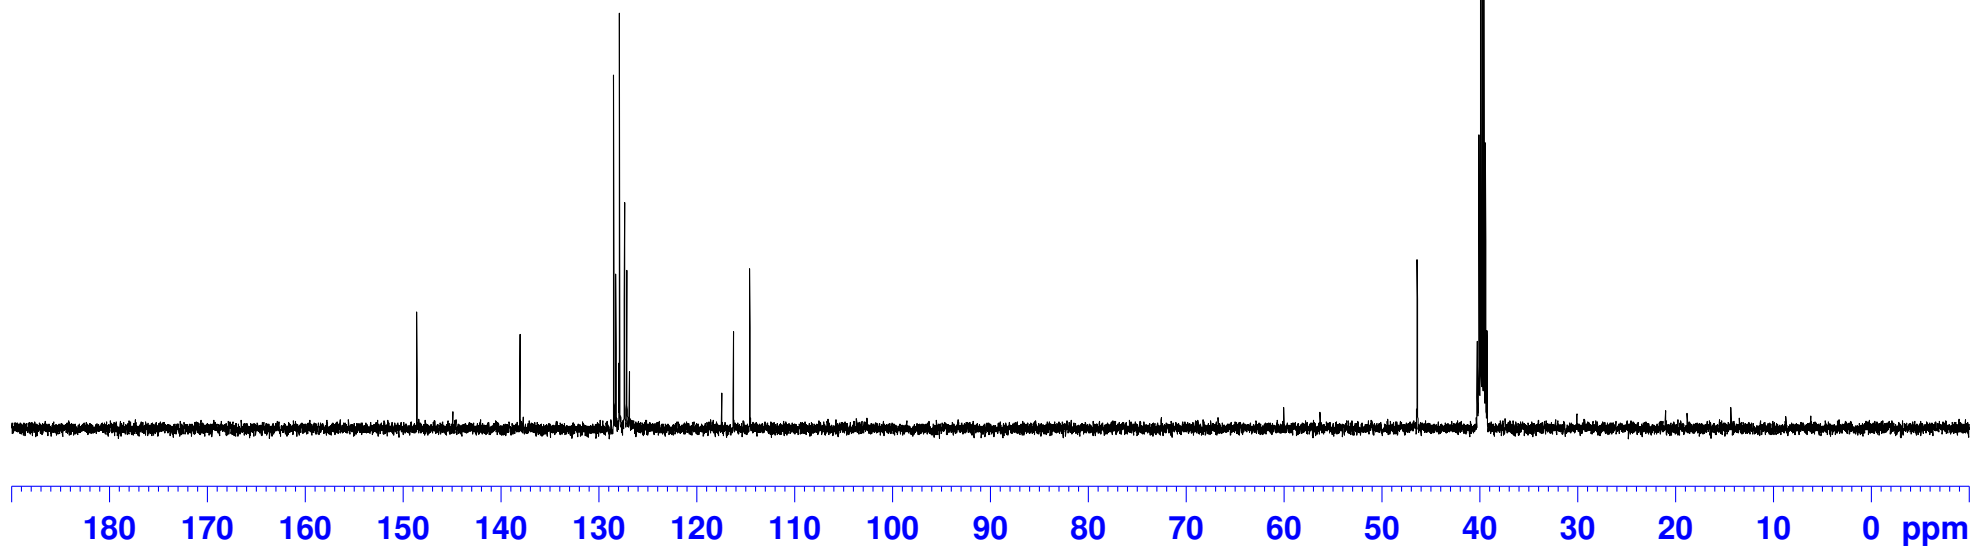

4-amino-N-benzyl-3,5-dichlorobenzenesulfonamide  
Proton DMSO-d6

8.035  
8.022  
8.009  
7.557  
7.277  
7.262  
7.248  
7.239  
7.226  
7.221  
7.203  
7.190  
6.343

3.984  
3.971

2.498

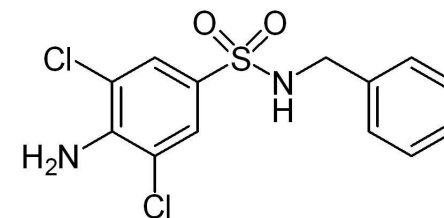

**3ea**

<sup>1</sup>H NMR (500 MHz, DMSO-d6)

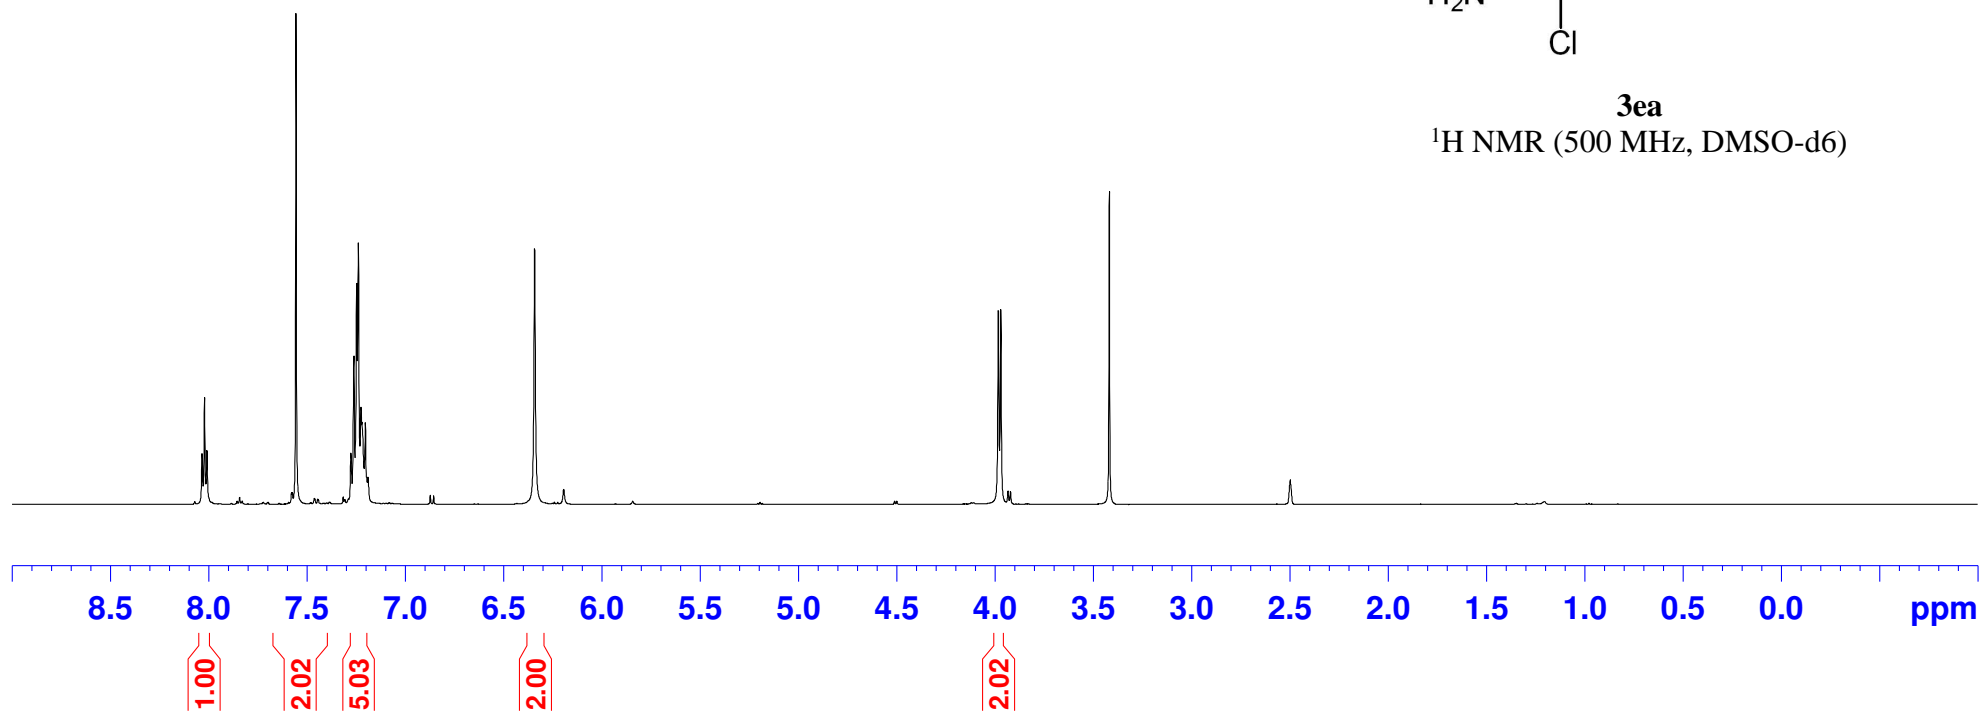

4-amino-N-benzyl-3,5-dichlorobenzenesulfonamide  
C13CPD DMSO-d6

— 144.892  
— 137.702  
— 128.455  
— 127.944  
— 127.797  
— 127.402  
— 126.875  
— 117.467

— 46.487  
— 40.278  
— 40.110  
— 39.944  
— 39.777  
— 39.610  
— 39.443  
— 39.275

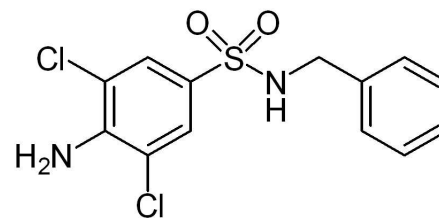

**3ea**

$^{13}\text{C}$  { $^1\text{H}$ } NMR (125 MHz, DMSO-d6)

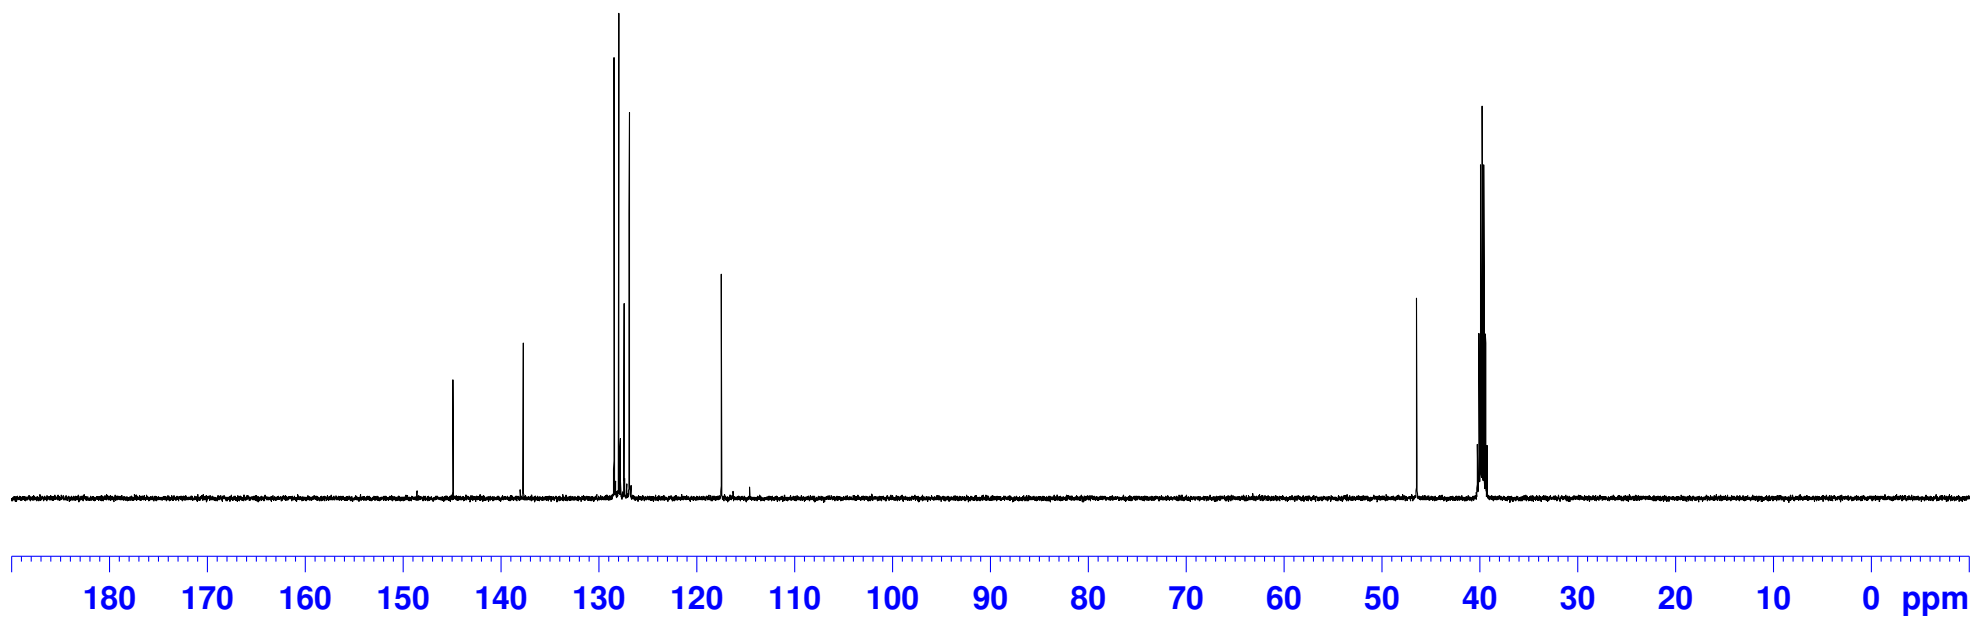



3-amino-N-benzylbenzenesulfonamide  
Proton DMSO-d6

7.961  
7.949  
7.936  
7.315  
7.300  
7.286  
7.268  
7.252  
7.235  
7.214  
7.199  
7.183  
7.039  
6.936  
6.921  
6.777  
6.761  
— 5.576  
3.954  
3.942  
— 2.500

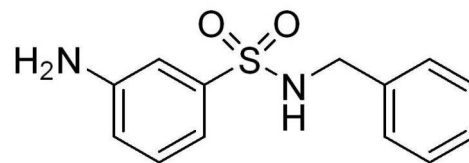

**3fa**  
<sup>1</sup>H NMR (500 MHz, DMSO-d6)

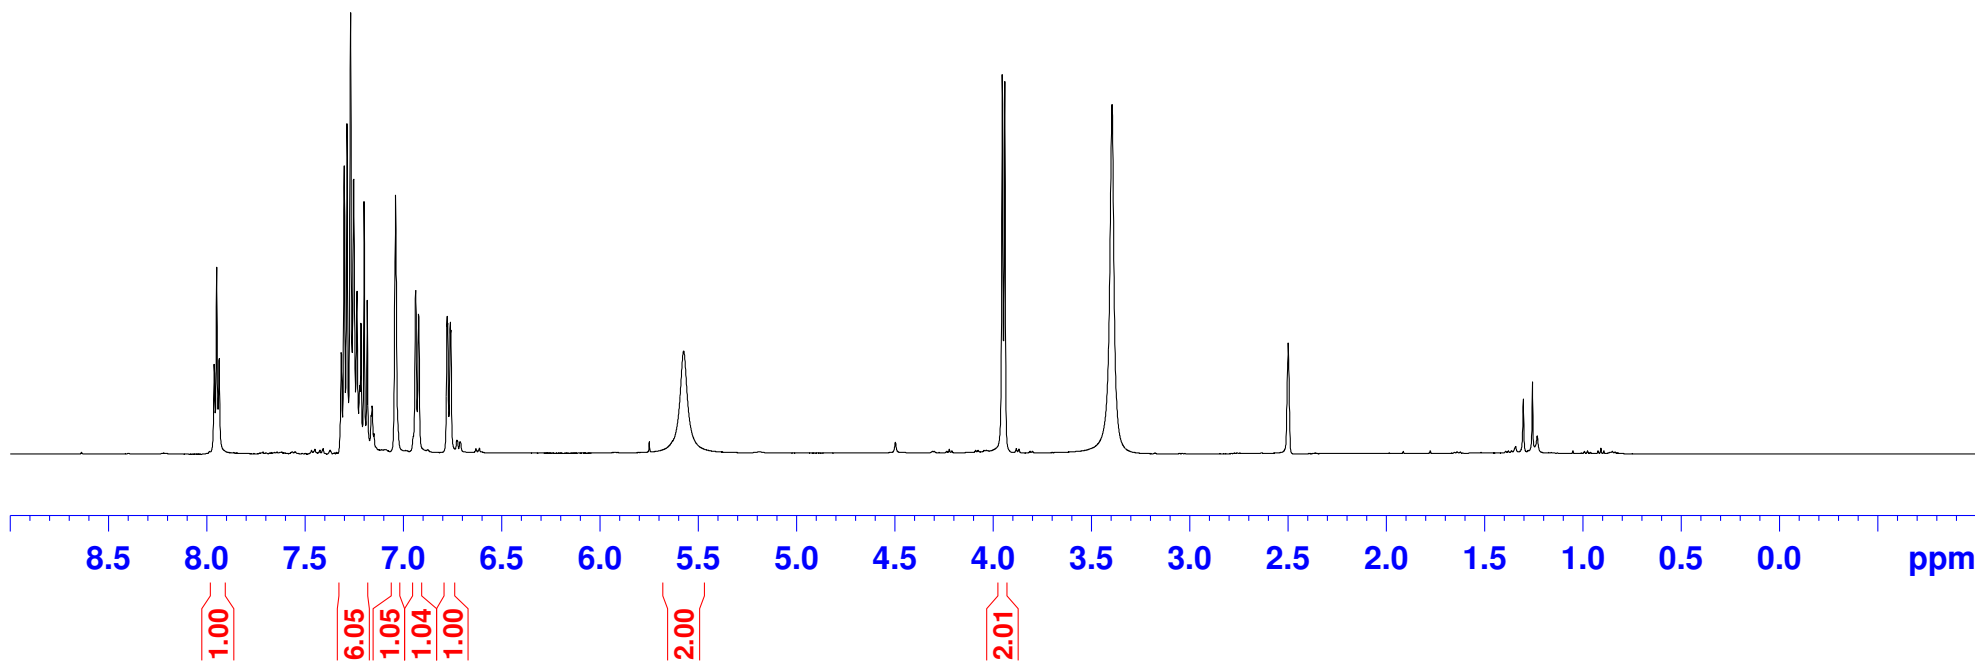

3-amino-N-benzylbenzenesulfonamide  
Proton DMSO-d6

— 149.636  
— 141.394  
— 138.231  
  { 129.853  
  { 128.511  
  { 127.814  
  { 127.398  
— 117.475  
— 113.480  
— 111.424

{ 46.436  
{ 40.290  
{ 40.122  
{ 39.955  
{ 39.788  
{ 39.621  
{ 39.454  
{ 39.287

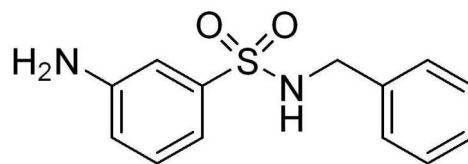

**3fa**

<sup>13</sup>C {<sup>1</sup>H} NMR (125 MHz, DMSO-d6)

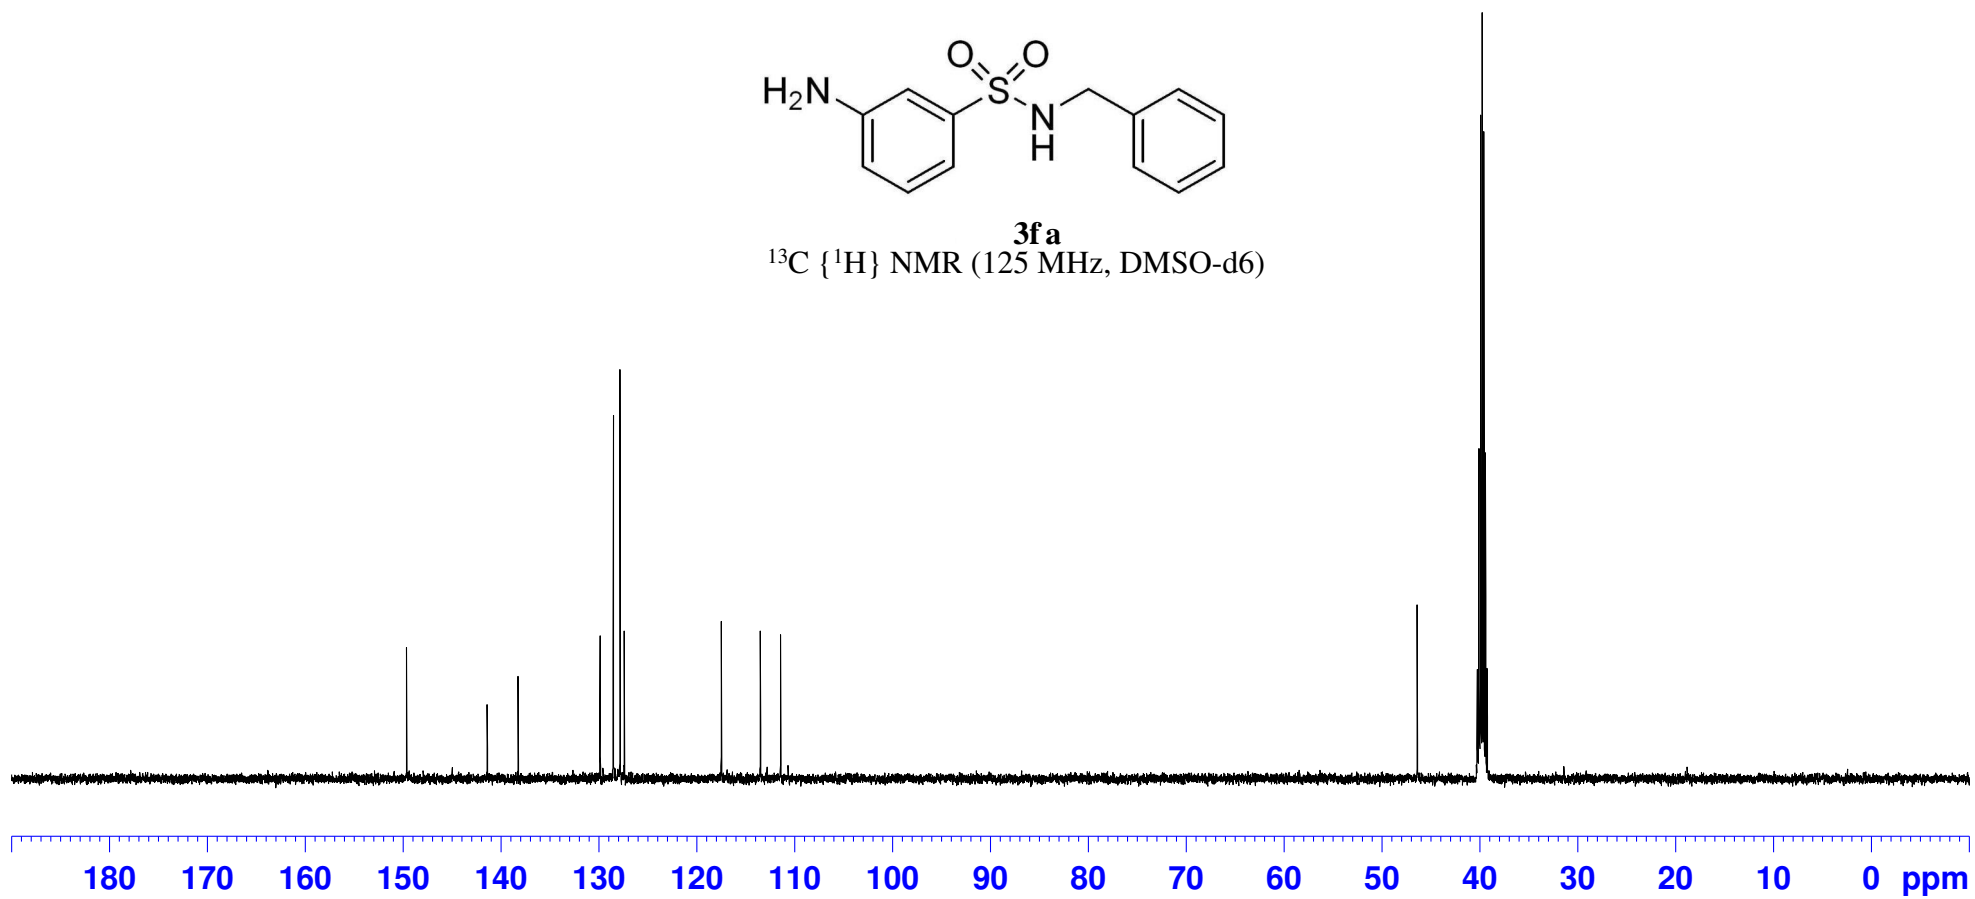

5-amino-N-benzyl-2-methylbenzenesulfonamide  
Proton DMSO-d6

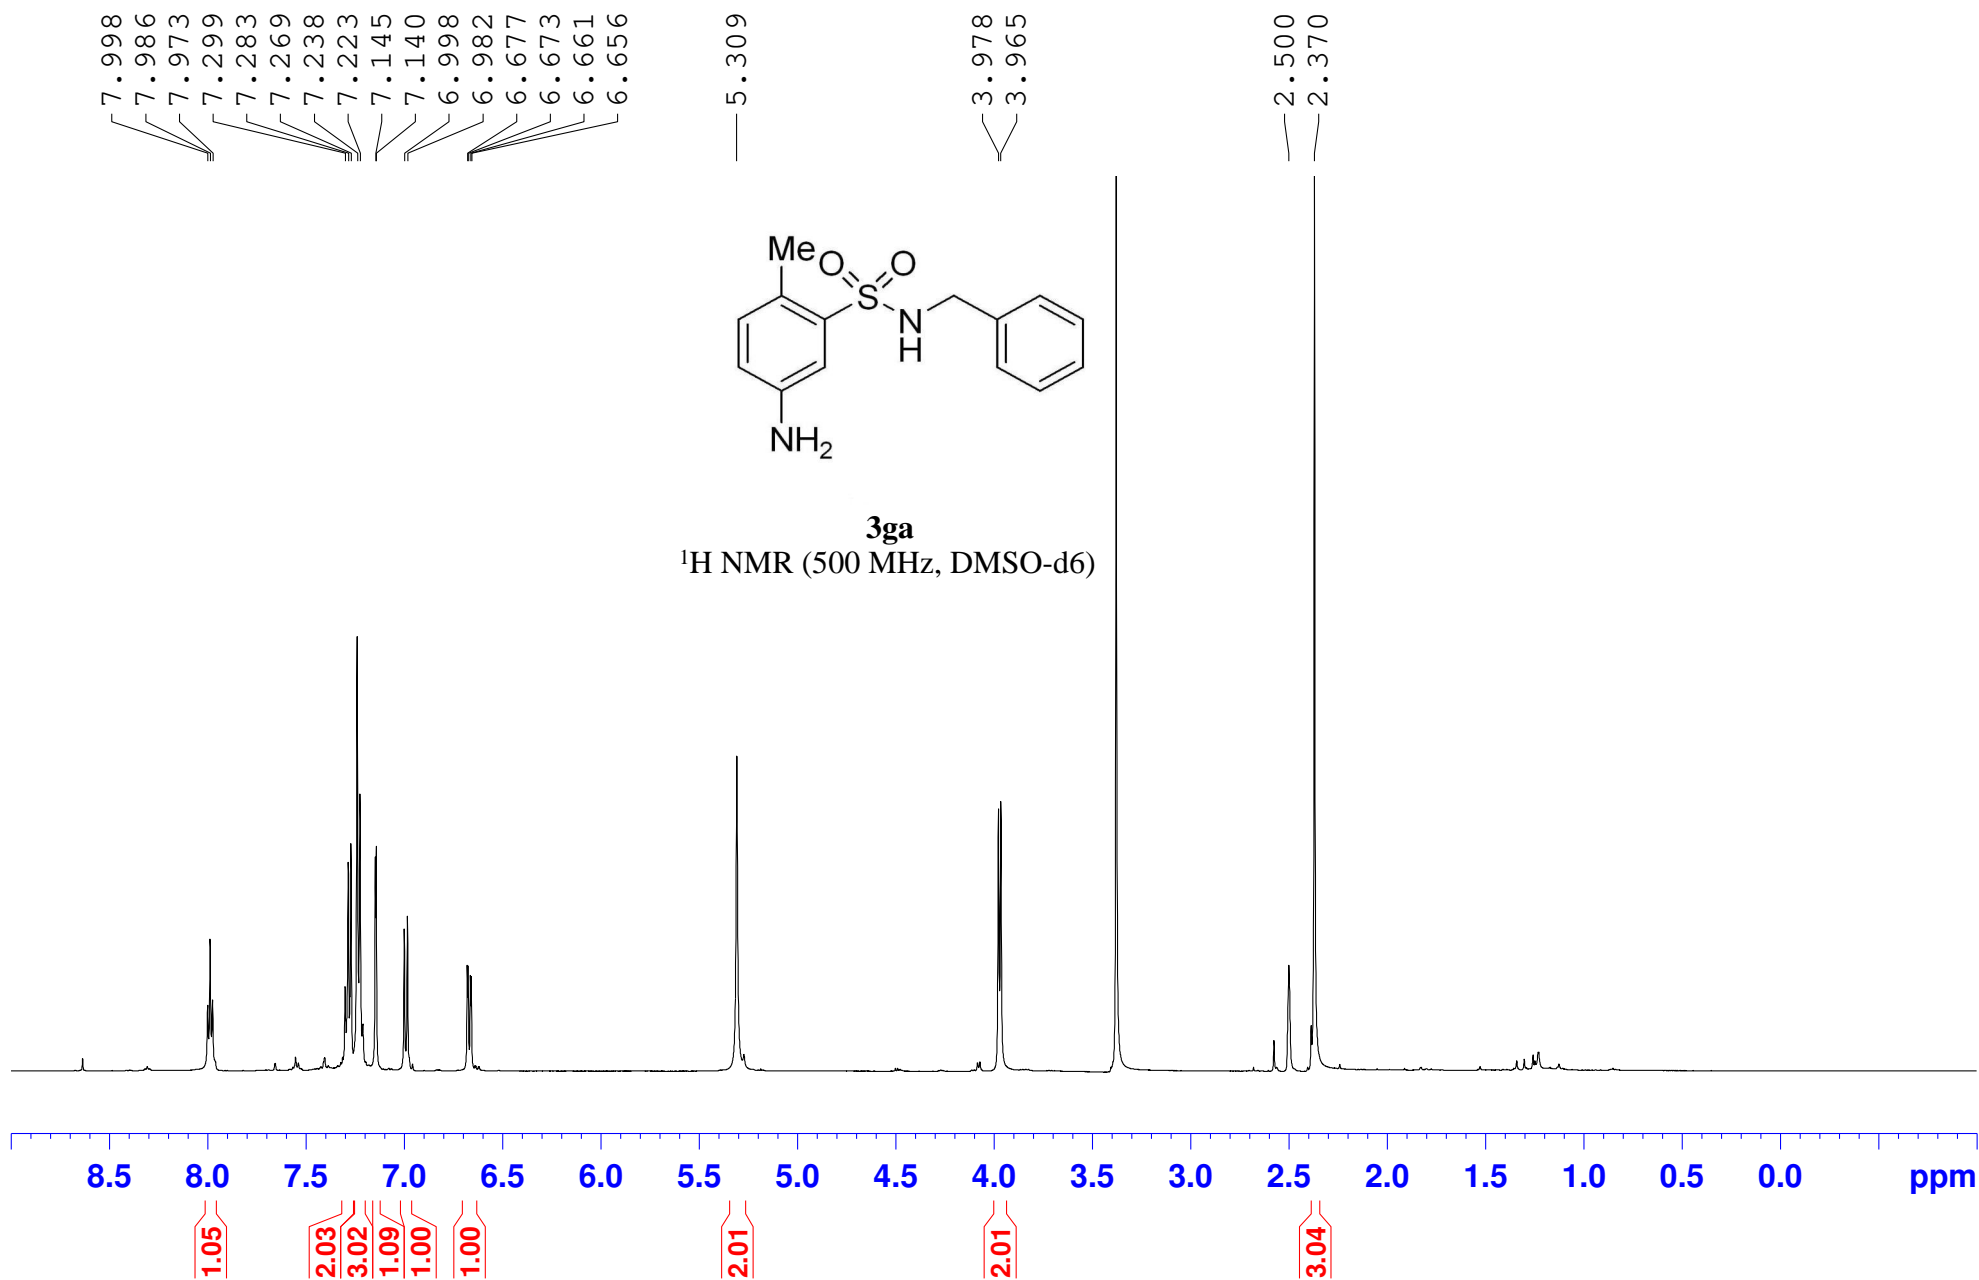

5-amino-N-benzyl-2-methylbenzenesulfonamide  
C13CPD DMSO-d6

— 147.137  
— 139.045  
— 138.482  
— 133.217  
— 128.447  
— 127.740  
— 127.334  
— 122.328  
— 117.589  
— 114.145

— 46.066  
— 40.292  
— 40.126  
— 39.959  
— 39.792  
— 39.625  
— 39.458  
— 39.291  
— 19.045

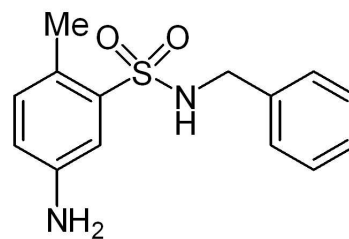

**3ga**

$^{13}\text{C}$  { $^1\text{H}$ } NMR (125 MHz, DMSO-d6)

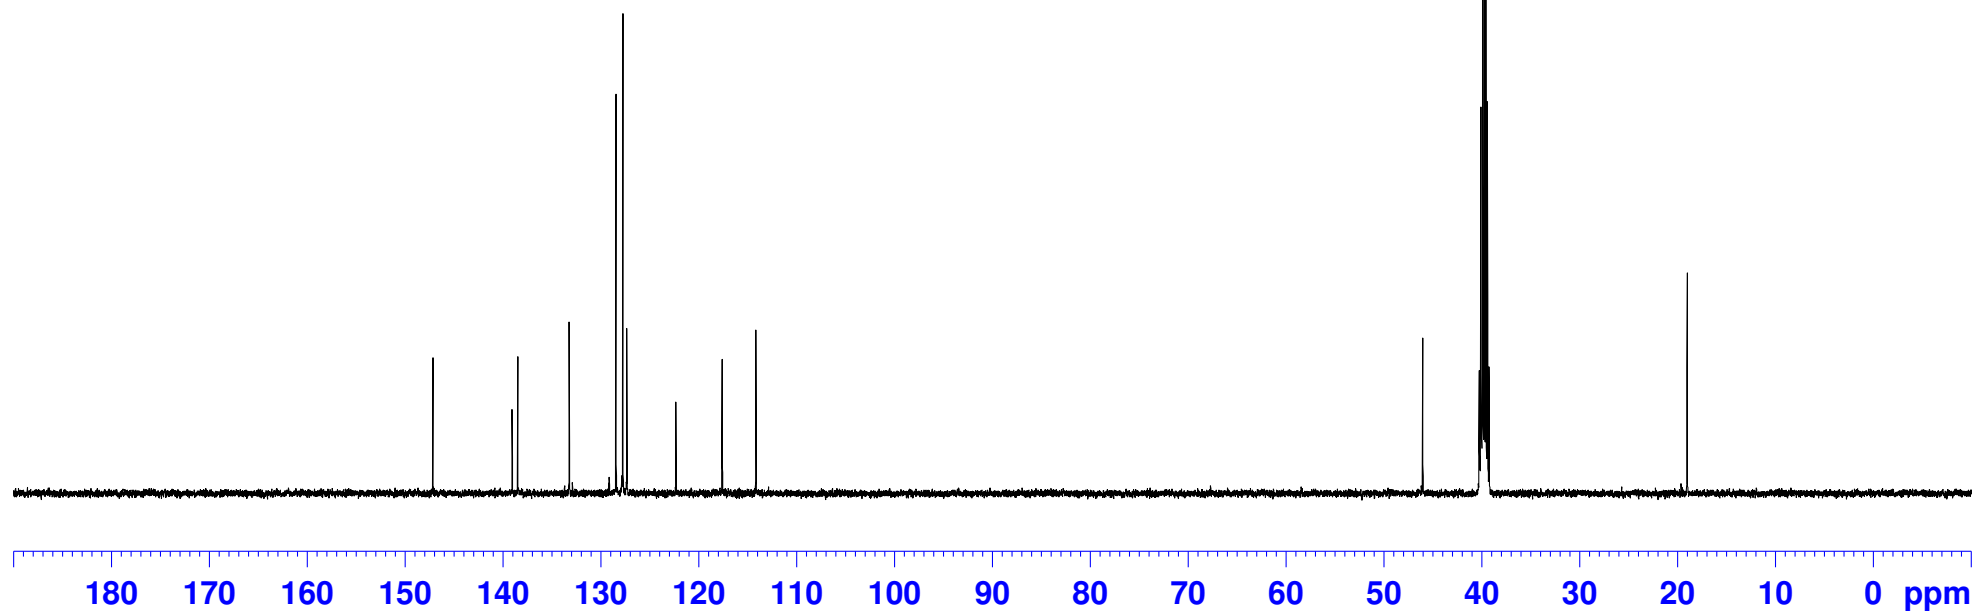

2-amino-N-benzylbenzenesulfonamide  
Proton DMSO-d6

8.073  
8.061  
8.050  
7.540  
7.524  
7.290  
7.275  
7.261  
7.245  
7.232  
7.219  
7.205  
6.836  
6.820  
6.630  
6.615  
6.600  
5.939

3.951  
3.939

2.500

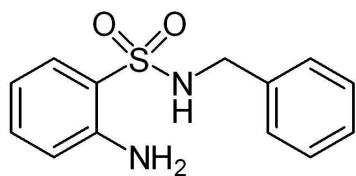

**3ha**

<sup>1</sup>H NMR (500 MHz, DMSO-d6)

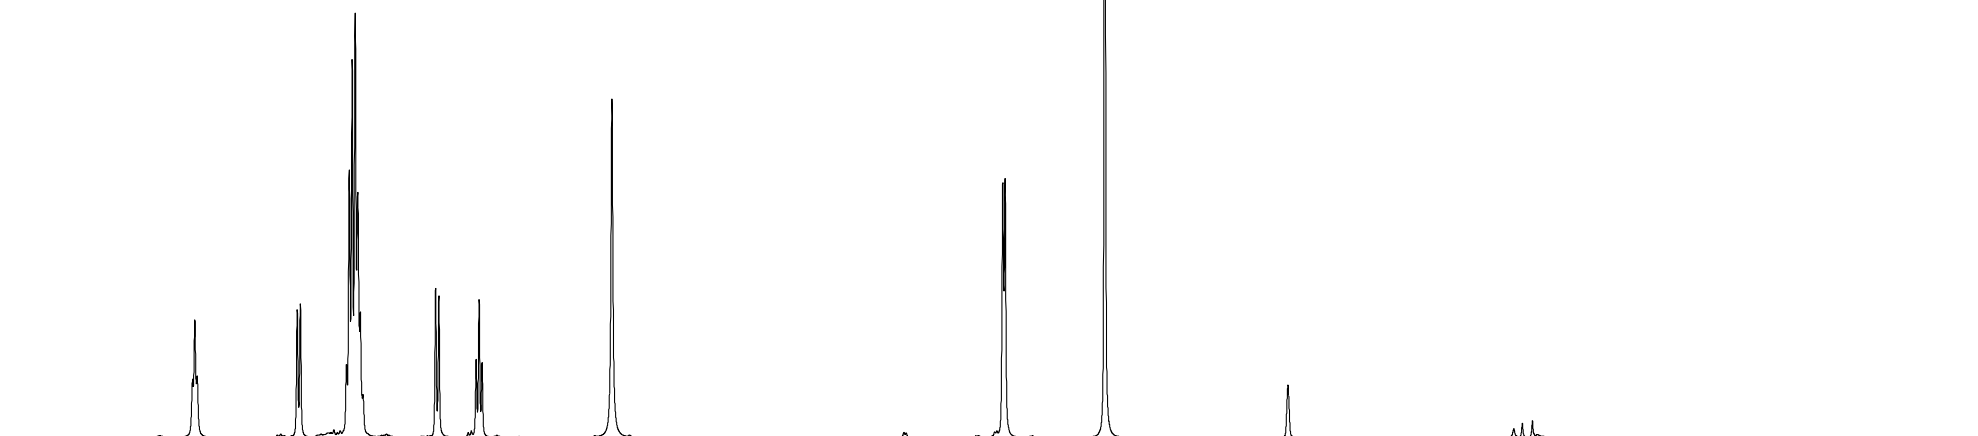

8.5

8.0

7.5

7.0

6.5

6.0

5.5

5.0

4.5

4.0

3.5

3.0

2.5

2.0

1.5

1.0

0.5

0.0

ppm

1.00

1.01

6.05

1.02

1.03

1.99

2.04

2-amino-N-benzylbenzenesulfonamide  
C13CPD DMSO-d6

— 146.507  
— 138.015  
— 133.766  
— 129.372  
— 128.485  
— 127.795  
— 127.406  
— 120.272  
— 117.190  
— 115.440

45.980  
40.263  
40.097  
39.930  
39.763  
39.596  
39.429  
39.262

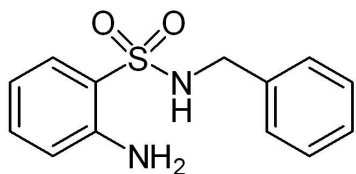

**3ha**

$^{13}\text{C}$  { $^1\text{H}$ } NMR (125 MHz, DMSO-d6)

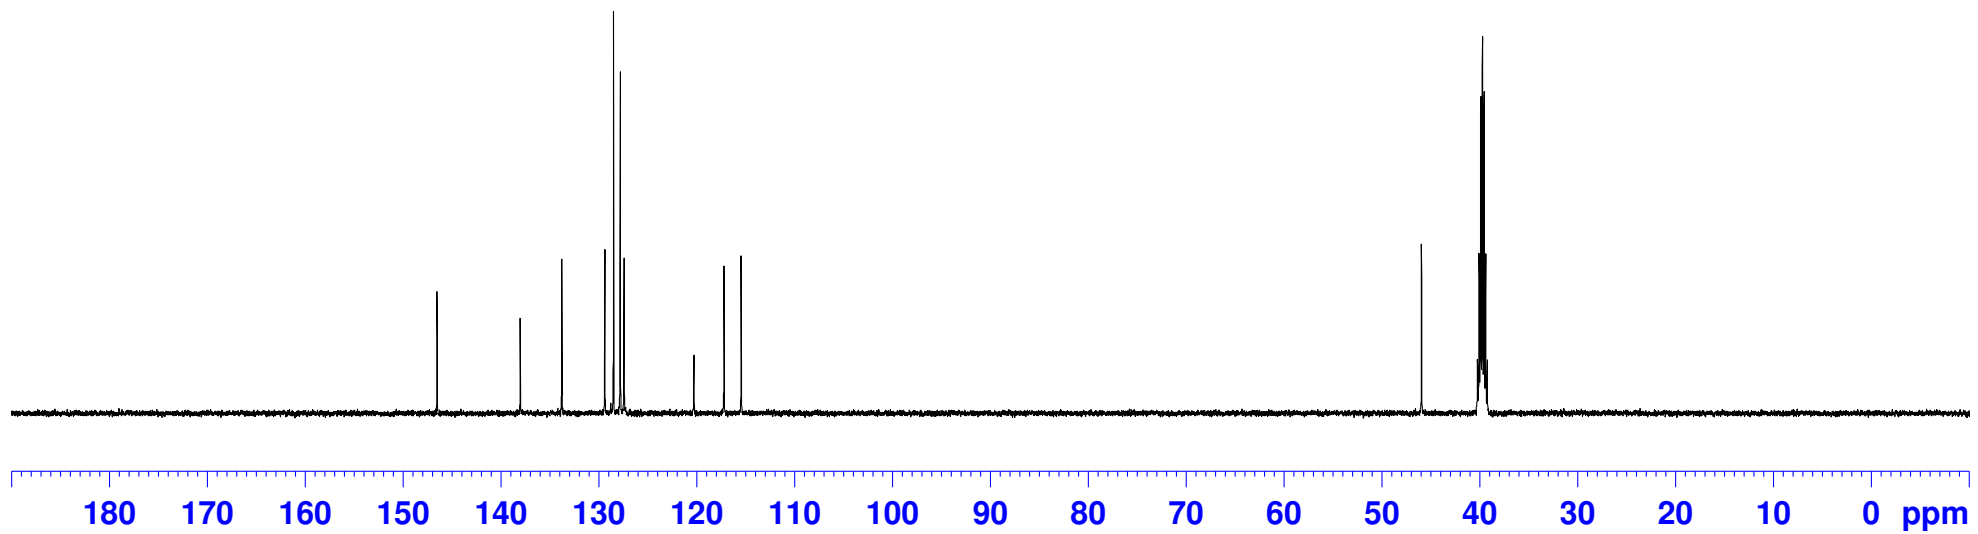

4-amino-N-phenethylbenzenesulfonamide  
Proton DMSO-d6

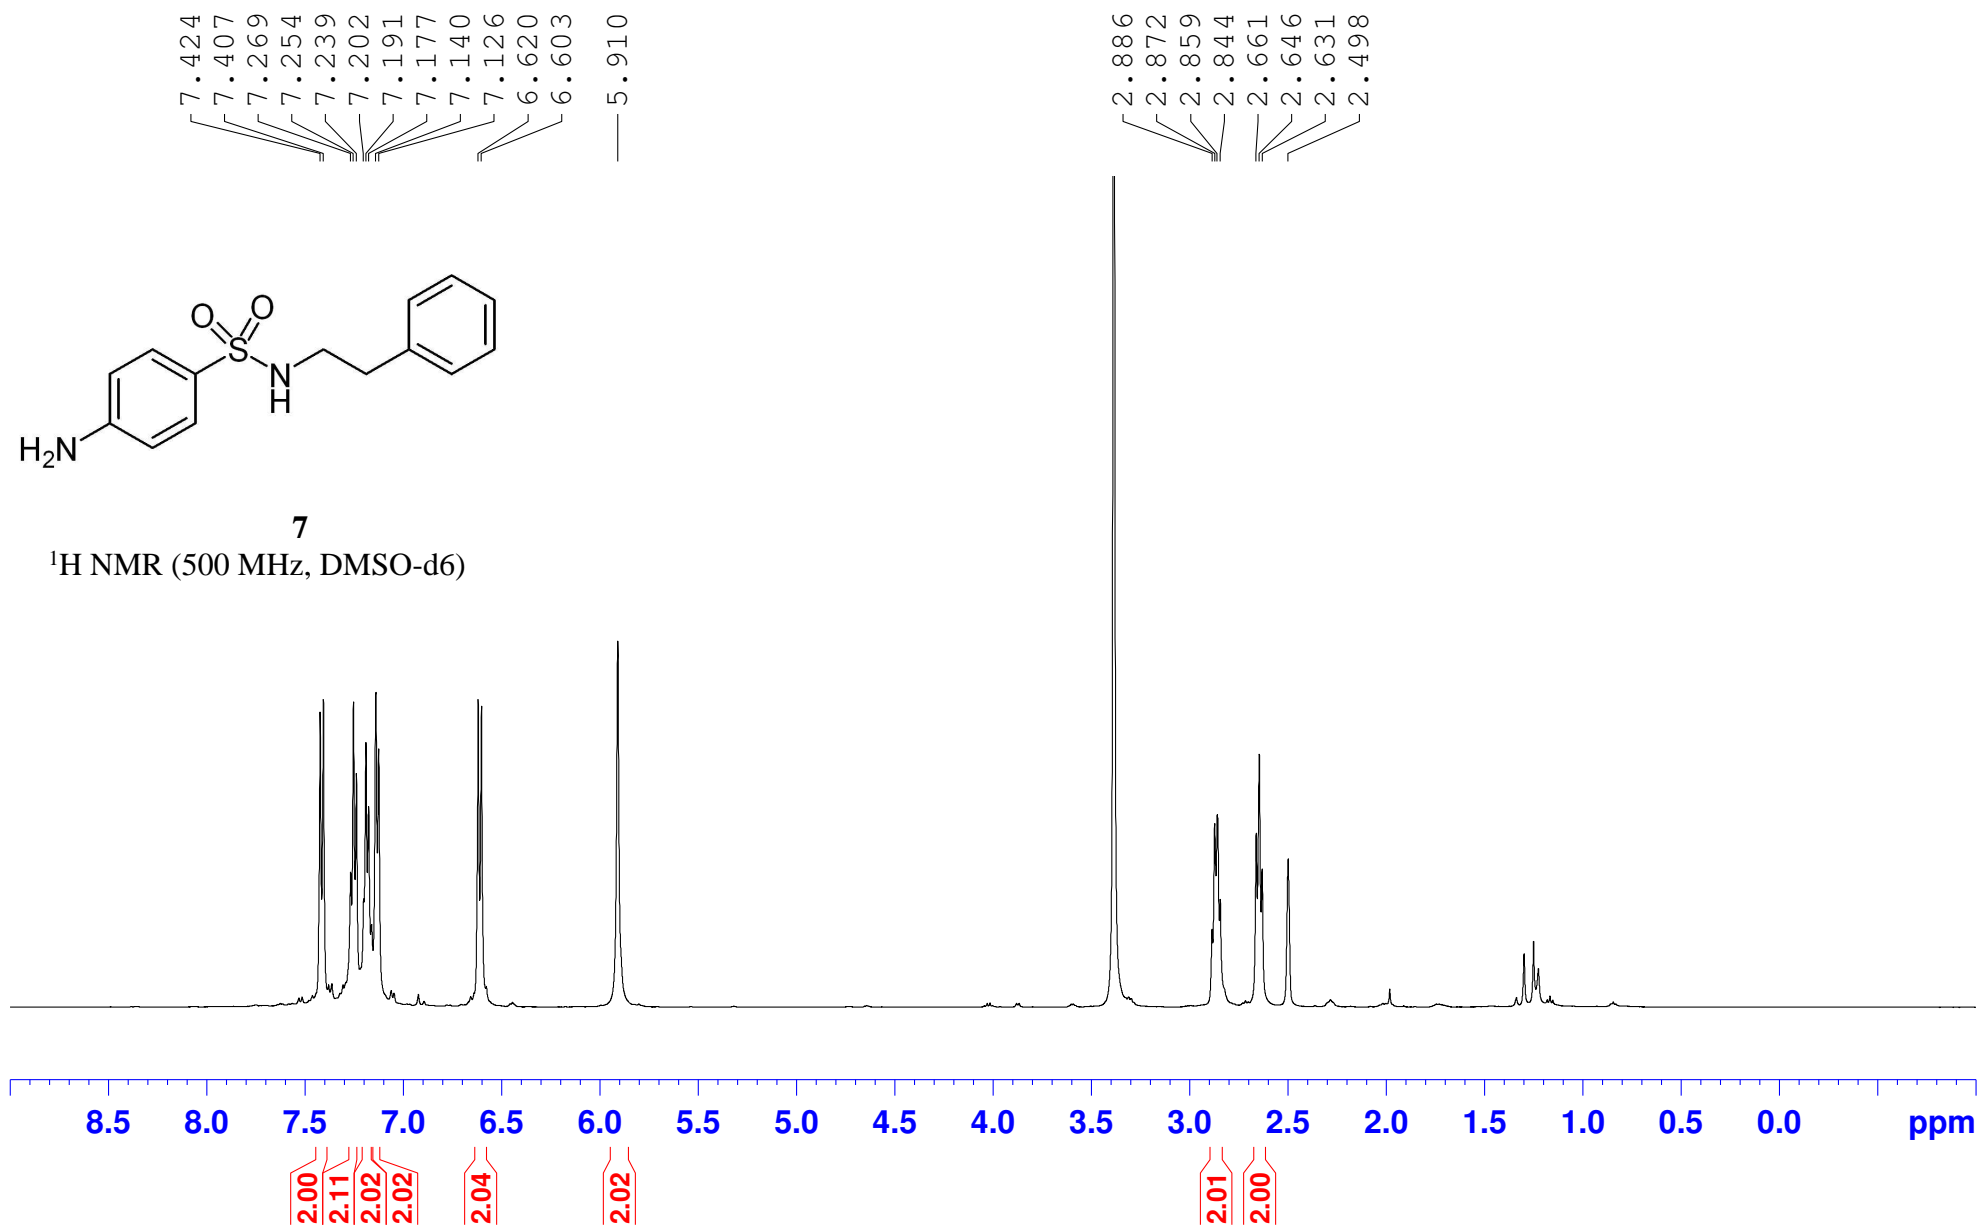

4-amino-N-phenethylbenzenesulfonamide  
C13CPD DMSO-d6

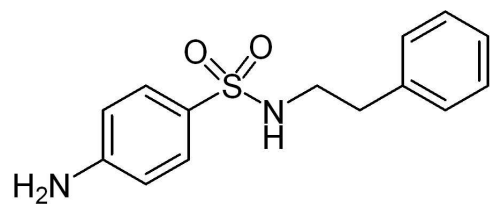

7

$^{13}\text{C}$  { $^1\text{H}$ } NMR (125 MHz, DMSO-d6)

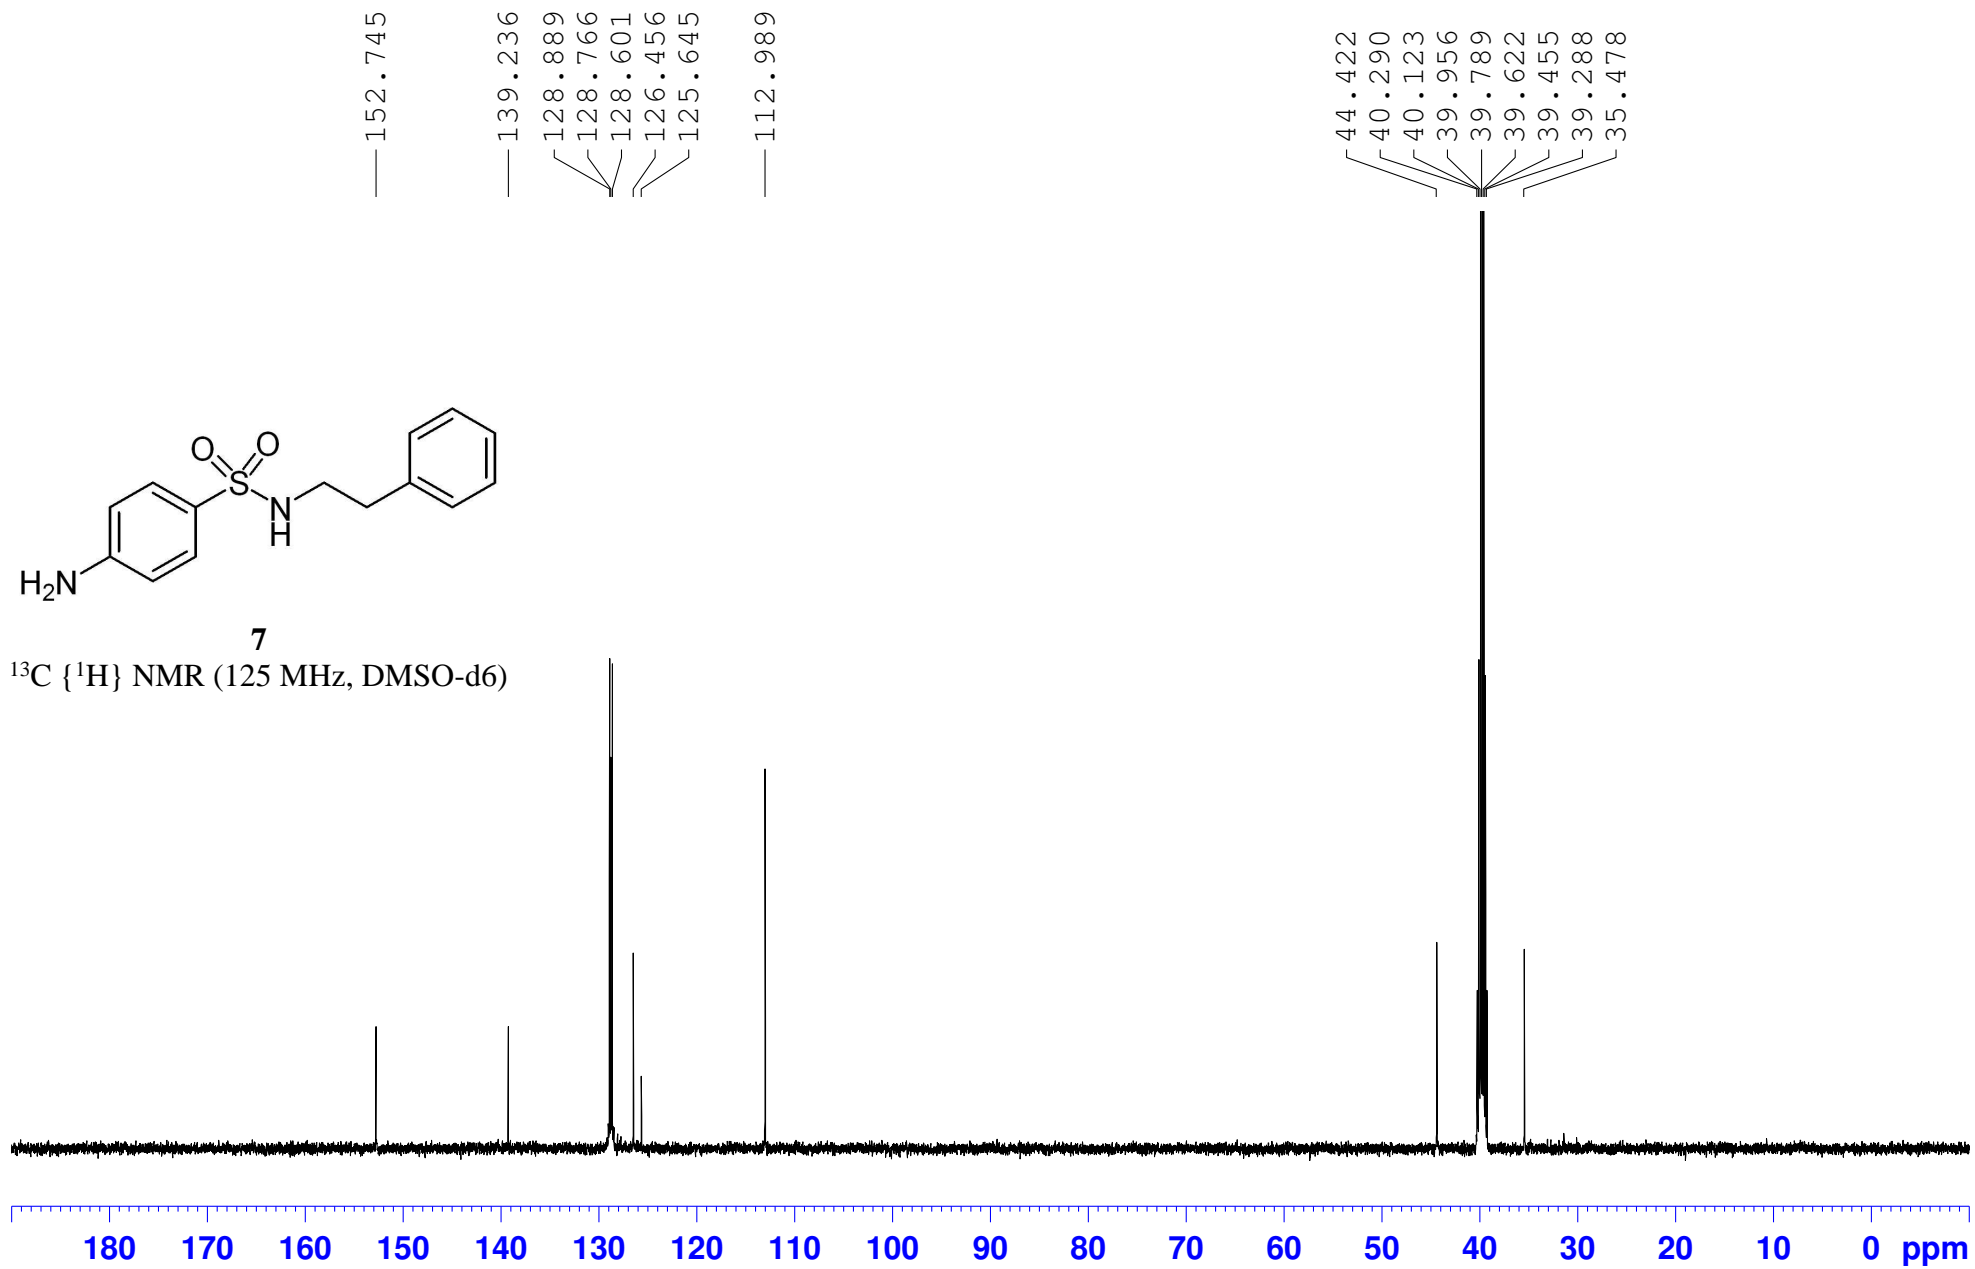



4-((3-chloro-1,4-dioxo-1,4-dihydronaphthalen-2-yl)amino)-N-phenethylbenzenesulfonamide  
Proton DMSO-d6

9.540  
8.054  
8.039  
7.888  
7.873  
7.858  
7.839  
7.824  
7.809  
7.707  
7.690  
7.632  
7.621  
7.609  
7.279  
7.264  
7.255  
7.251  
7.238  
7.201  
7.187  
7.172  
7.153  
7.138

2.994  
2.980  
2.966  
2.952  
2.682  
2.666  
2.652  
2.500

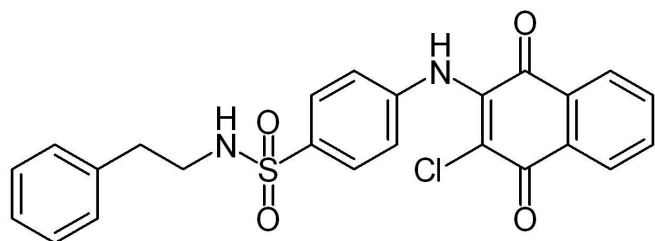

9

<sup>1</sup>H NMR (500 MHz, DMSO-d6)

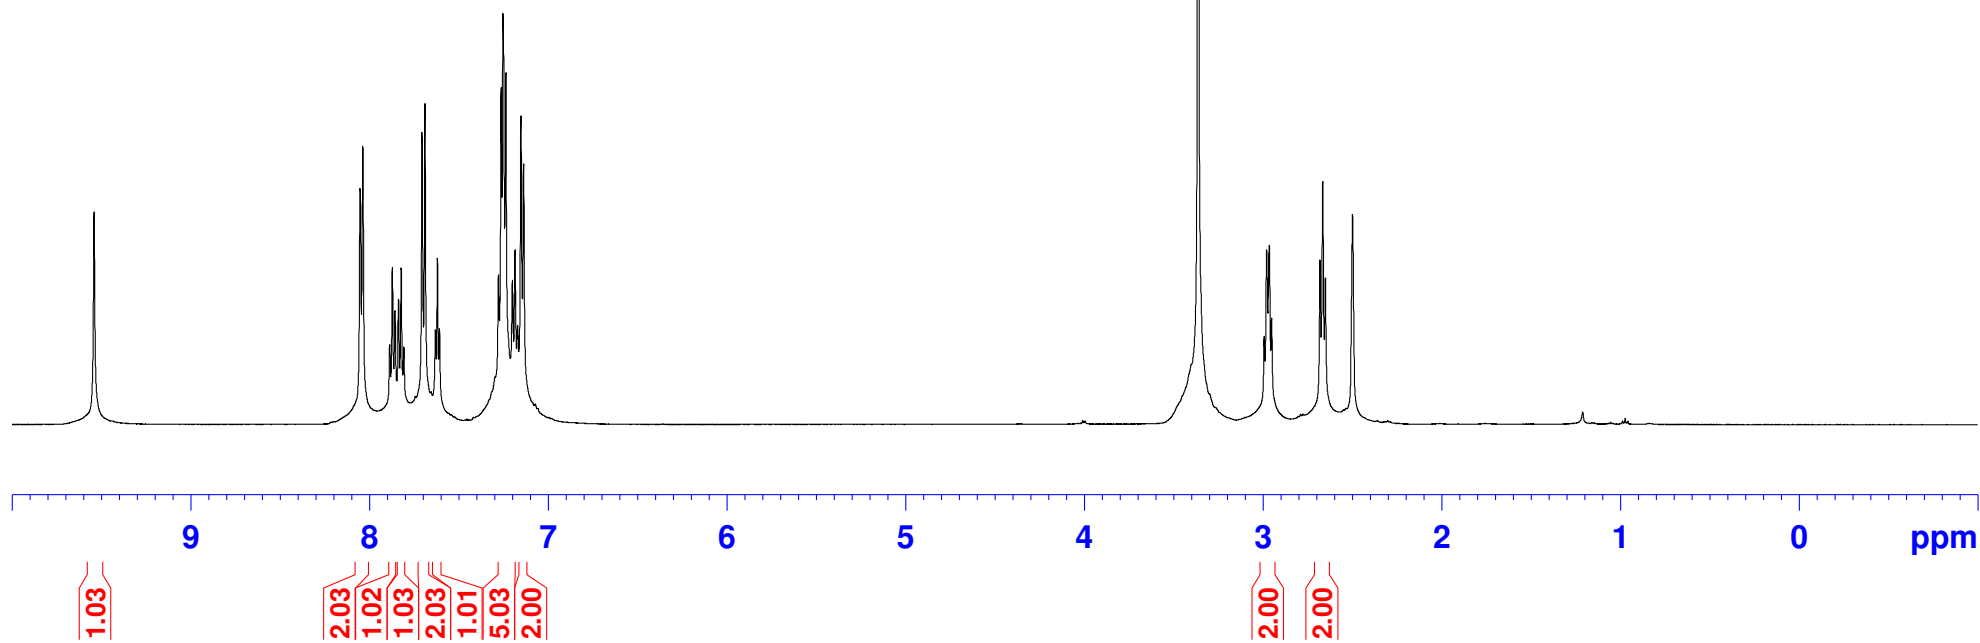

4-((3-chloro-1,4-dioxo-1,4-dihydronaphthalen-2-yl)amino)-N-phenethylbenzenesulfonamide  
C13CPD DMSO-d6

180.159  
177.240

143.135  
142.953  
139.000  
135.015  
134.820  
133.783  
131.995  
130.717  
128.910  
128.621  
127.018  
126.874  
126.523  
122.793  
118.662

44.415  
40.280  
40.113  
39.945  
39.778  
39.611  
39.445  
39.273  
35.521

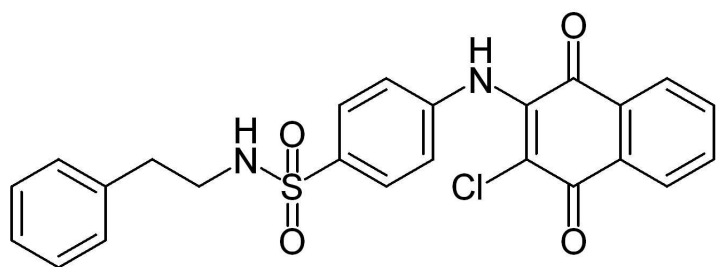

9

$^{13}\text{C}$  { $^1\text{H}$ } NMR (125 MHz, DMSO-d6)

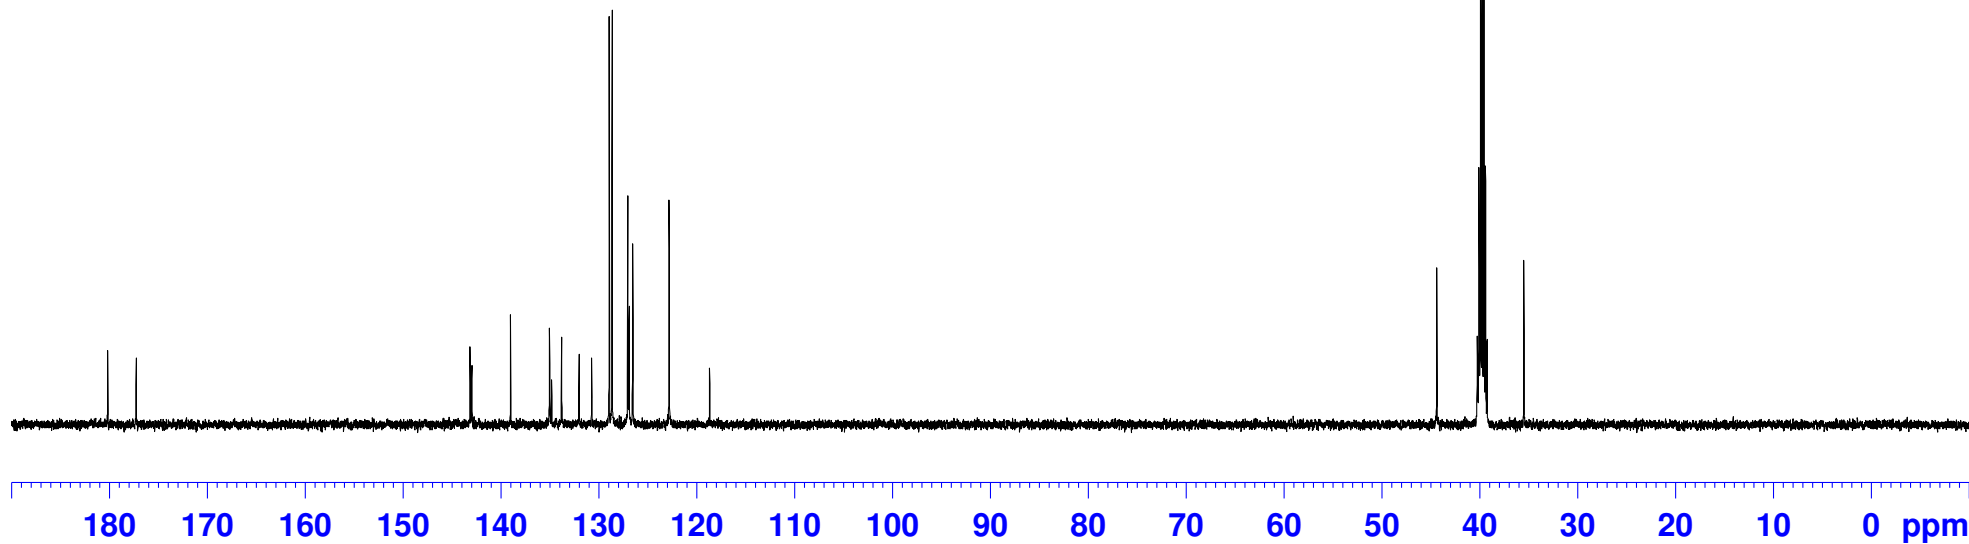

Supplement: d2qm00357k1.pdf [file d2qm00357k1.pdf]
